# Supplementary material for: Enhancing the stereoselectivity of Me 2 GaOR(NHC) species in the ring-opening polymerization of rac -lactide, with the help of the chelation effect
Source: Royal Society of Chemistry journal article supplement (doi:10.1039/d4ra05320f), 2024-01-01
Supplement: d4ra05320f1.pdf [file d4ra05320f1.pdf]

## Supporting information

### Enhancing the stereoselectivity of Me<sub>2</sub>GaOR(NHC) species in the ring-opening polymerization of *rac*-lactide, with the help of the chelation effect

Paweł Horeglad,<sup>a,\*</sup> Anna Rola-Noworyta,<sup>a</sup> Dawid Tuszyński,<sup>a</sup> Iga Fabianowska,<sup>a</sup> Natalia Agnieszka Marek,<sup>a</sup> Patrycja Gładysz,<sup>a</sup> Ireneusz Wielgus,<sup>a</sup> and Anna Maria Dąbrowska<sup>a</sup>

<sup>a</sup> Faculty of Chemistry, Warsaw University of Technology, Noakowskiego 3, 00-664, Warsaw, Poland.

- 1) VT <sup>1</sup>H NMR data for complexes 3 and 4 (Figures S1 – S26)
- 2) FTIR data for complexes 3 and 4 (Figures S27 – S42)
- 3) <sup>13</sup>C NMR spectra of PLA obtained with 1 and 2 (Figures S43 – S45)
- 4) MALDI-TOF and GPC of PLA obtained with complexes 1 and 3 (Figures S46 – S89)

# 1) VT $^1\text{H}$ NMR Data

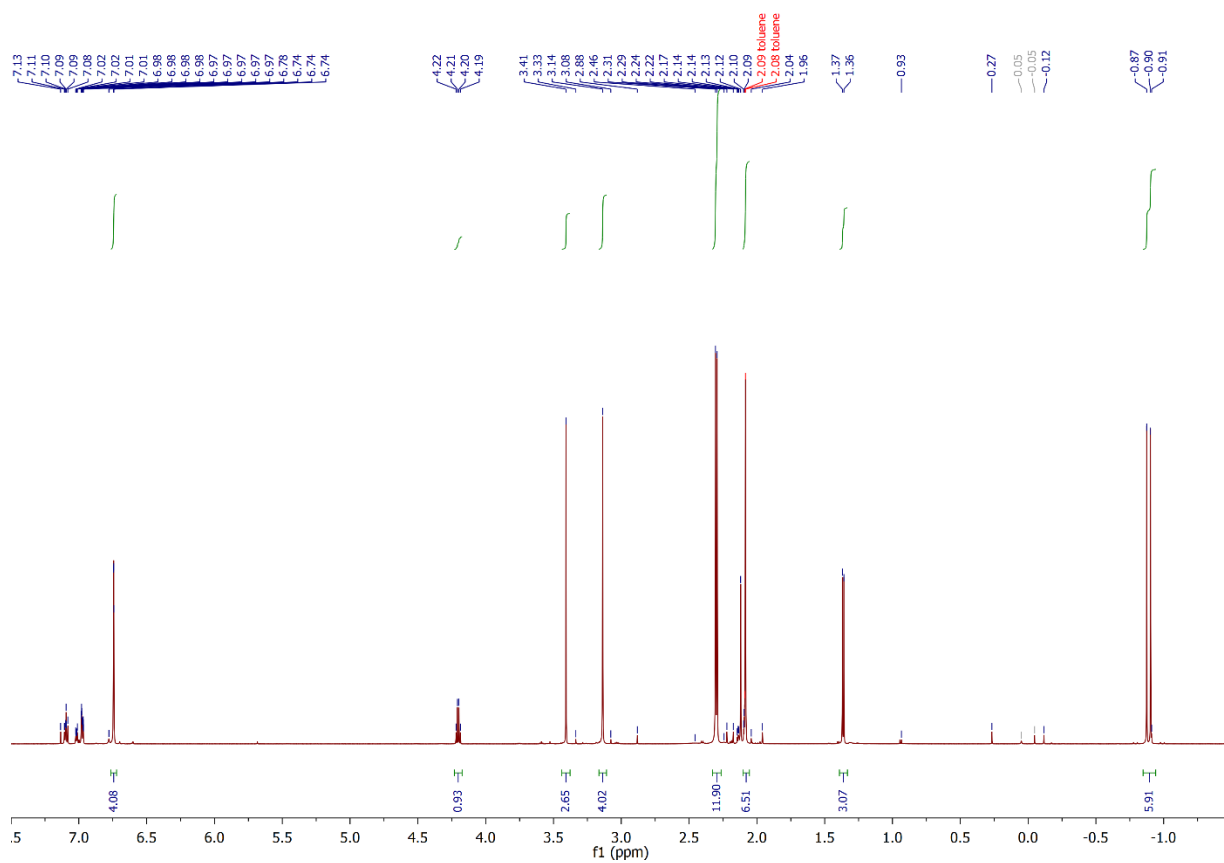

**Figure S1.**  $^1\text{H}$  NMR (toluene- $d_8$ , 400 MHz) spectrum of **3** at r.t.

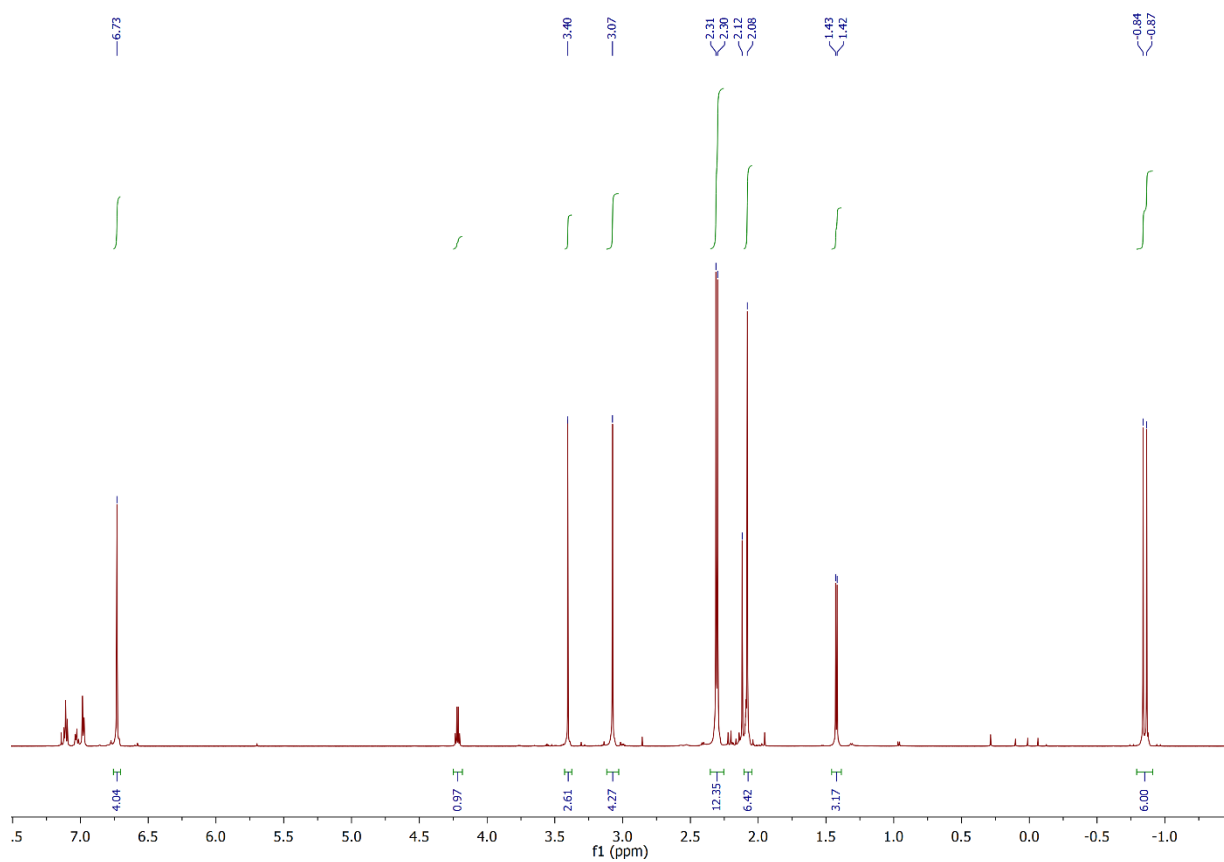

**Figure S2.**  $^1\text{H}$  NMR (toluene- $d_8$ , 400 MHz) spectrum of **3** at  $0^\circ\text{C}$

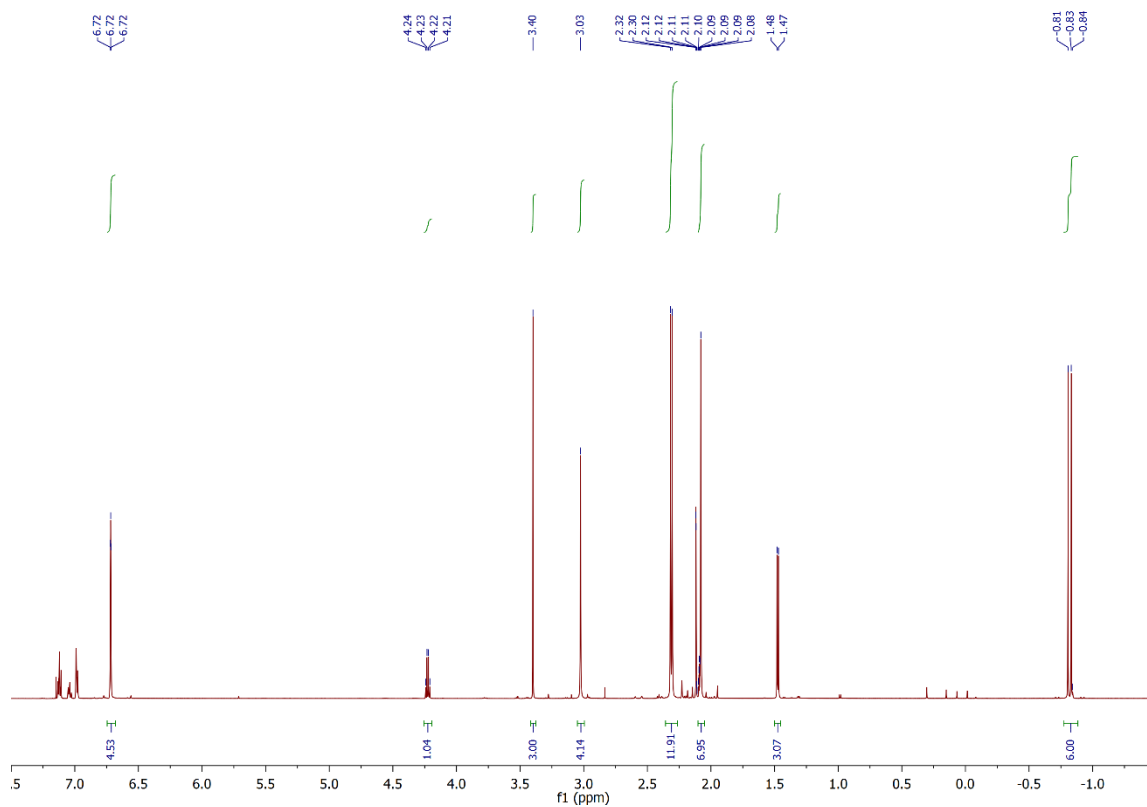

**Figure S3.**  $^1\text{H}$  NMR (toluene- $d_8$ , 400 MHz) spectrum of **3** at  $-20^\circ\text{C}$

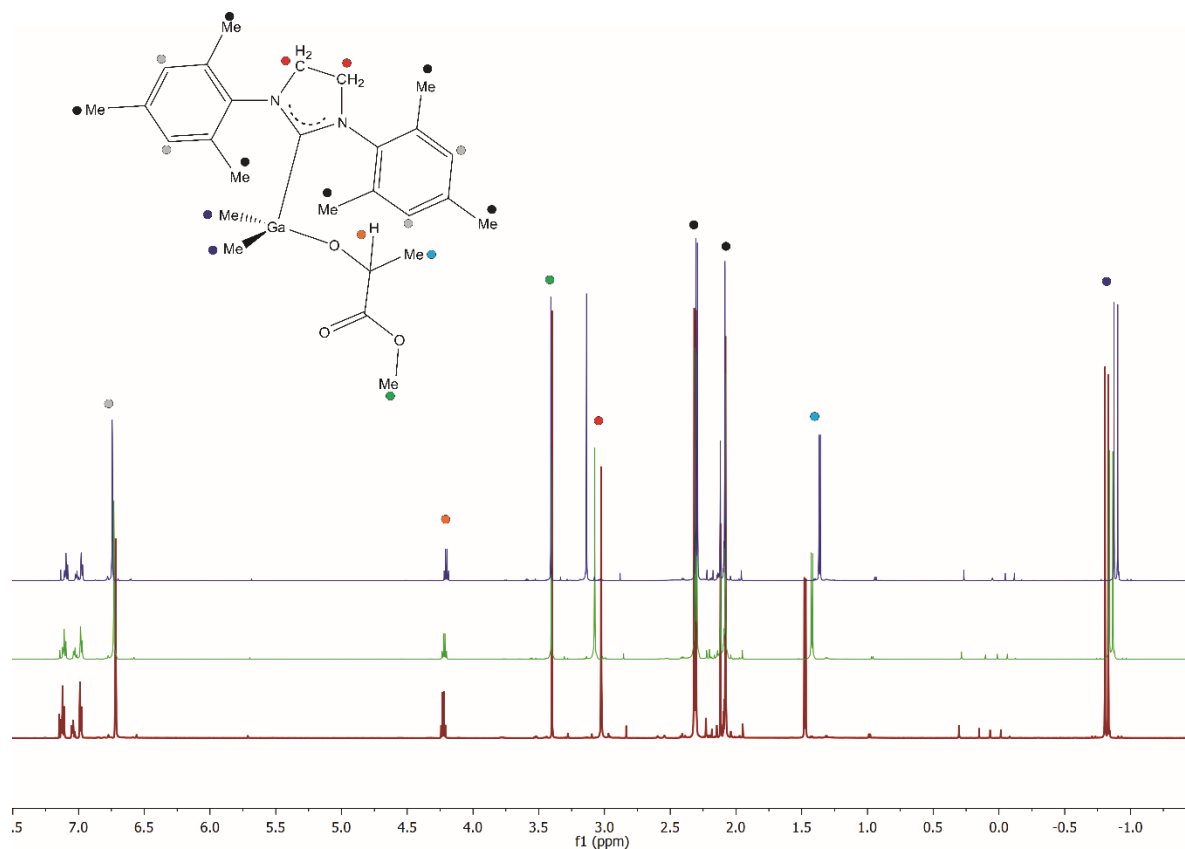

**Figure S4.** VT  $^1\text{H}$  NMR (toluene- $d_8$ , 400 MHz) spectra of **3** at r.t. (blue),  $0^\circ\text{C}$  (green) and  $-20^\circ\text{C}$  (red)

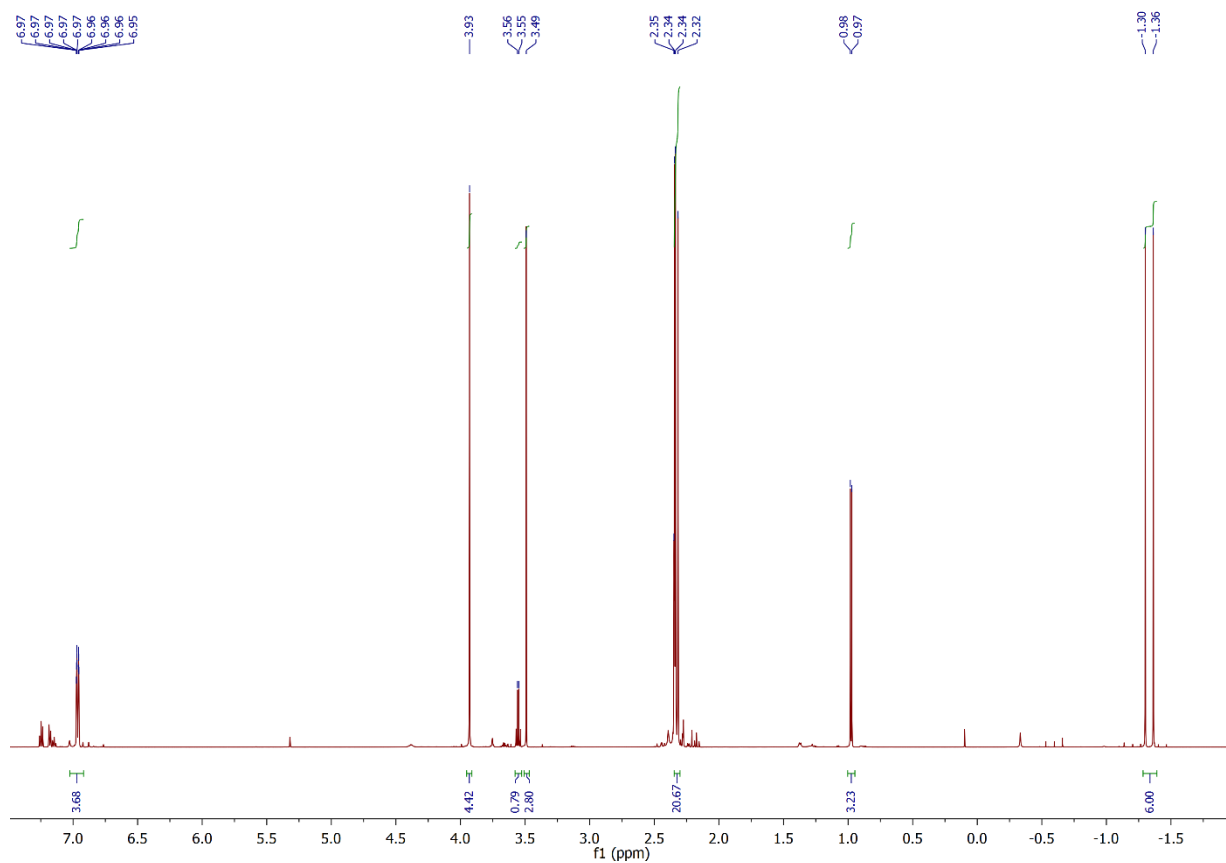

**Figure S5.**  $^1\text{H}$  NMR ( $\text{CD}_2\text{Cl}_2$ , 400 MHz) spectrum of **3** at r.t.

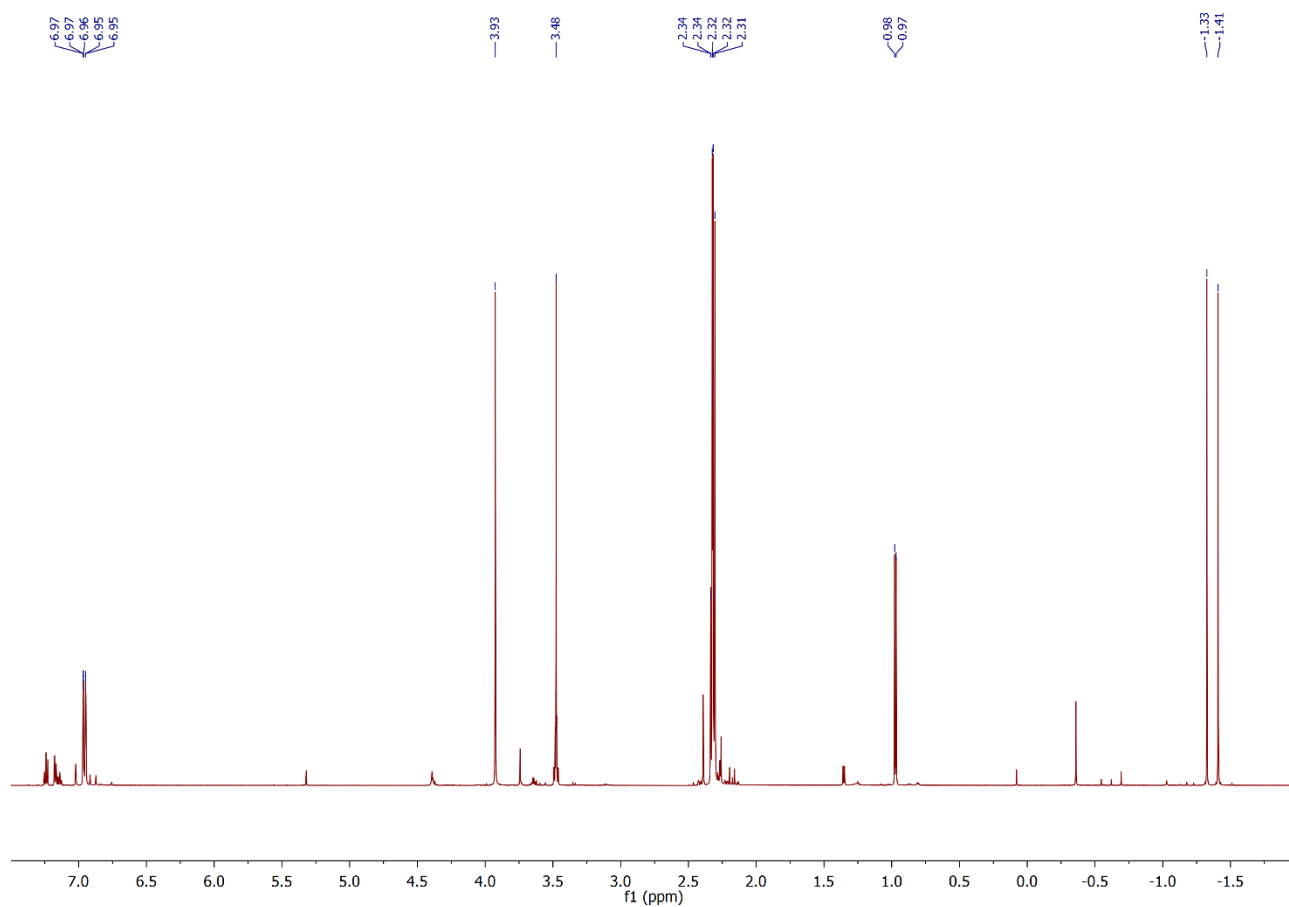

**Figure S6.**  $^1\text{H}$  NMR ( $\text{CD}_2\text{Cl}_2$ , 400 MHz) spectrum of **3** at  $0^\circ\text{C}$



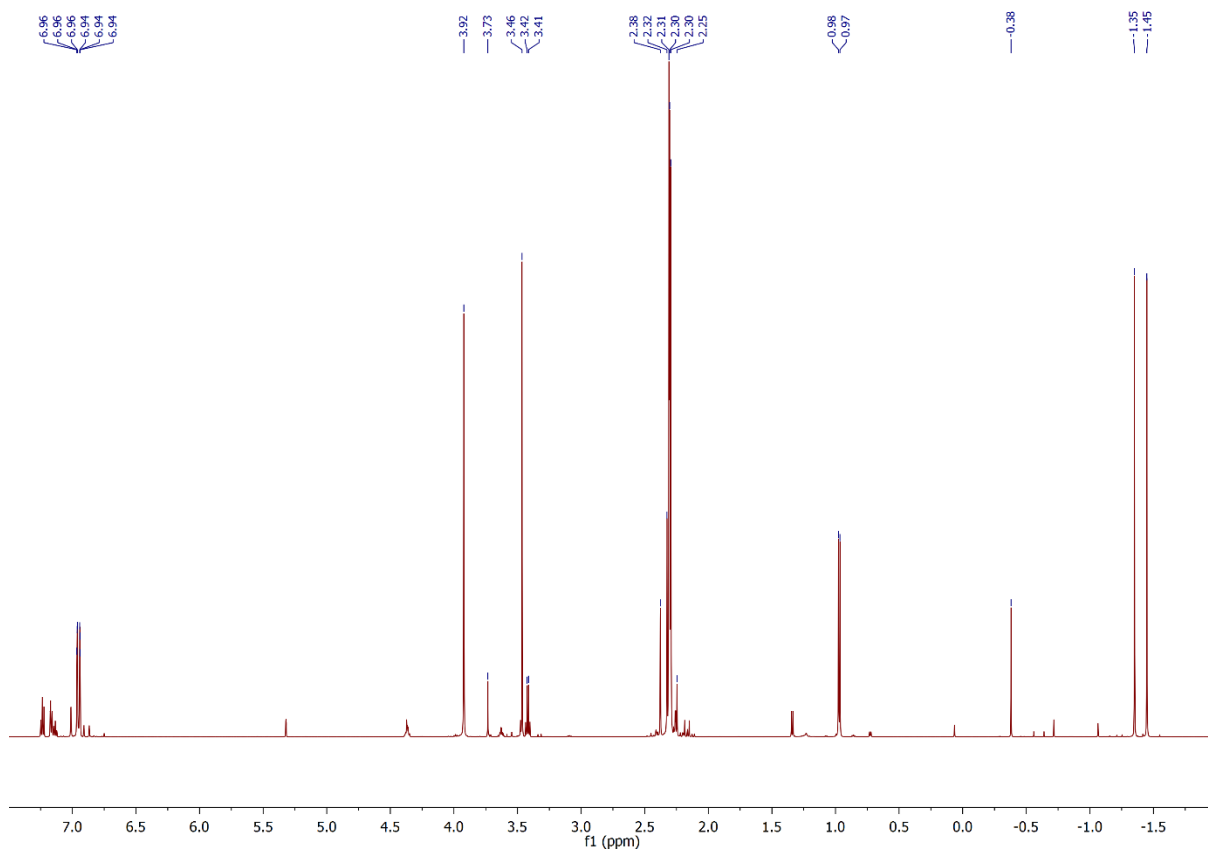

**Figure S7.**  $^1\text{H}$  NMR ( $\text{CD}_2\text{Cl}_2$ , 400 MHz) spectrum of **3** at  $-20^\circ\text{C}$

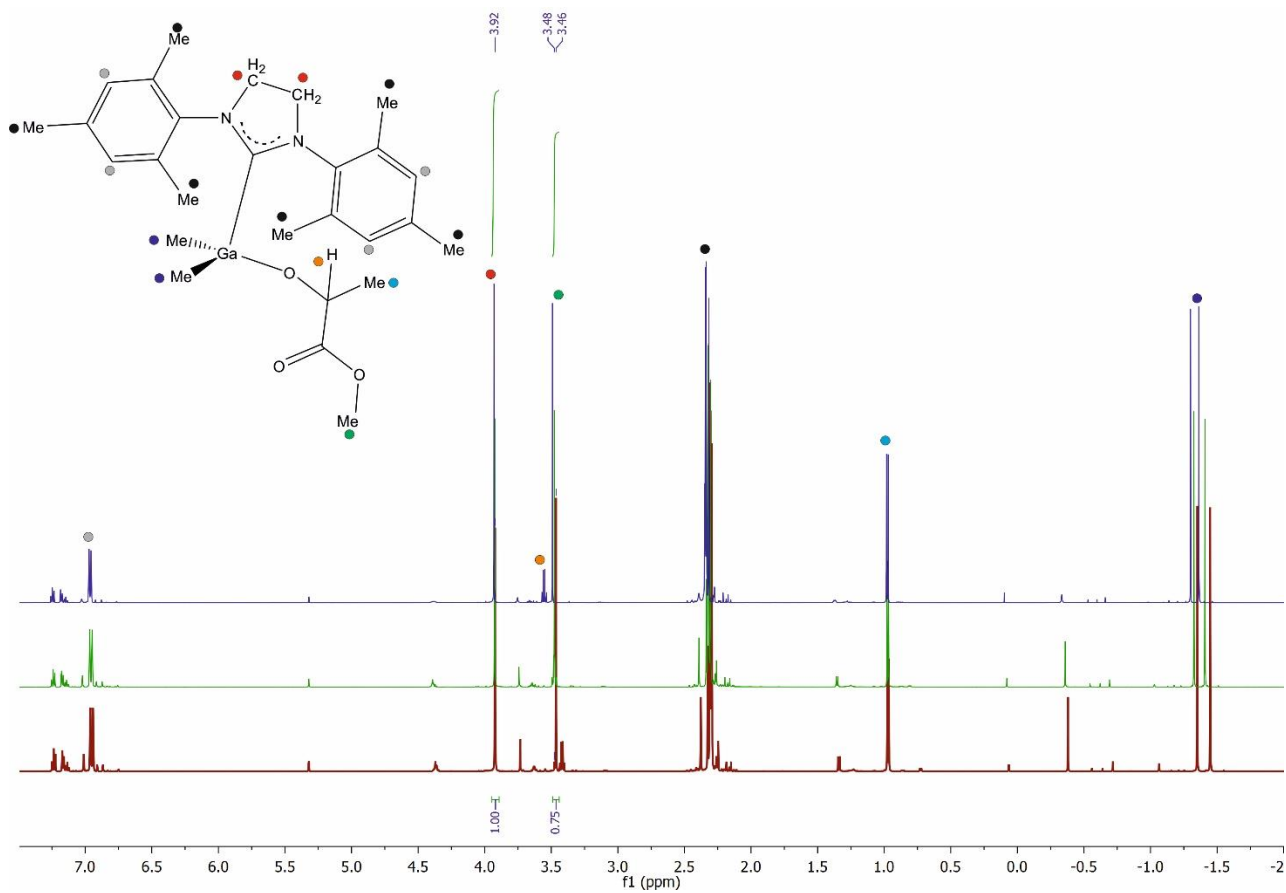

**Figure S8.** VT  $^1\text{H}$  NMR ( $\text{CD}_2\text{Cl}_2$ , 400 MHz) spectra of **3** at r.t. (blue),  $0^\circ\text{C}$  (green) and  $-20^\circ\text{C}$

(red)

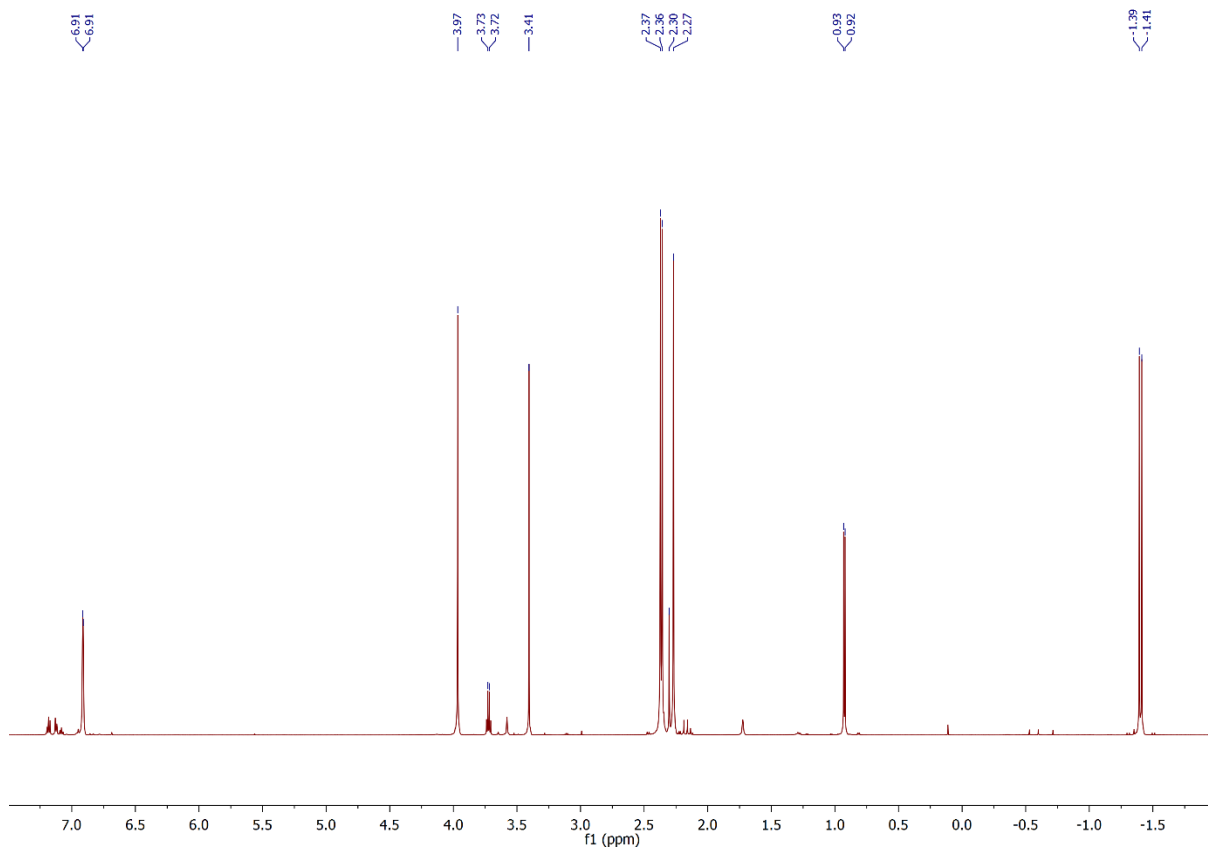

**Figure S9.**  $^1\text{H}$  NMR (THF- $d_8$ , 400 MHz) spectrum of **3** at r.t.

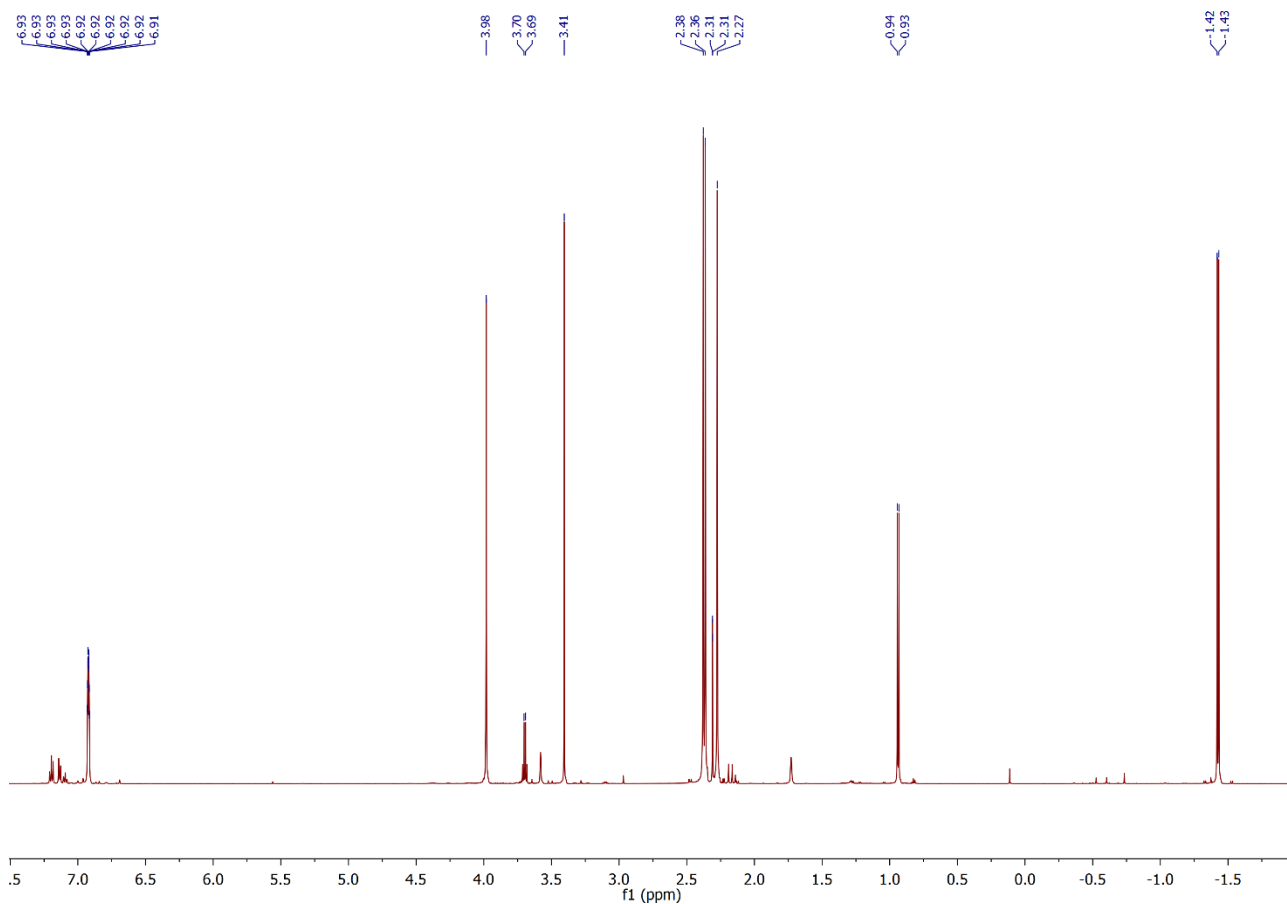

**Figure S10.**  $^1\text{H}$  NMR (THF- $d_8$ , 400 MHz) spectrum of **3** at  $0^\circ\text{C}$

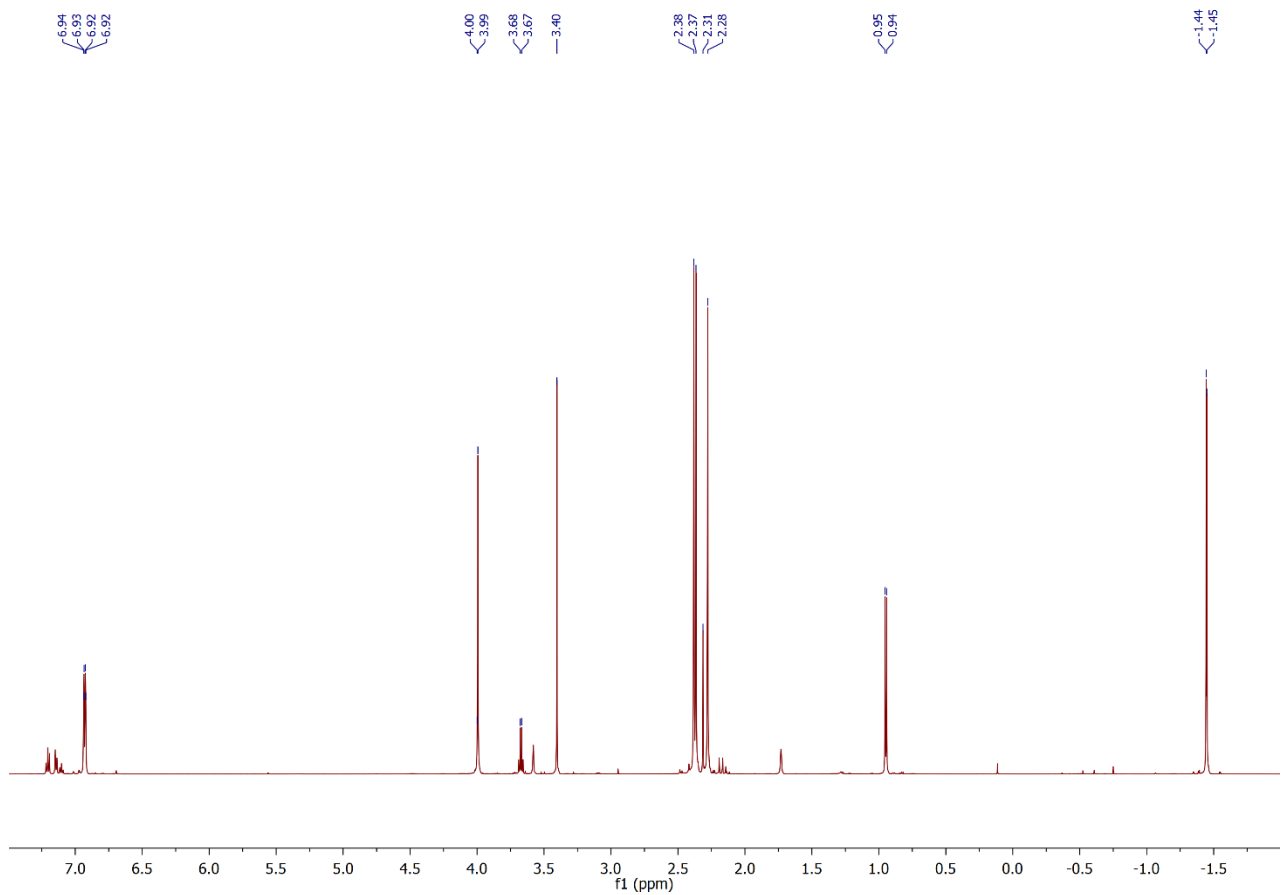

**Figure S11.**  $^1\text{H}$  NMR (THF- $d_8$ , 400 MHz) spectrum of **3** at  $-20^\circ\text{C}$

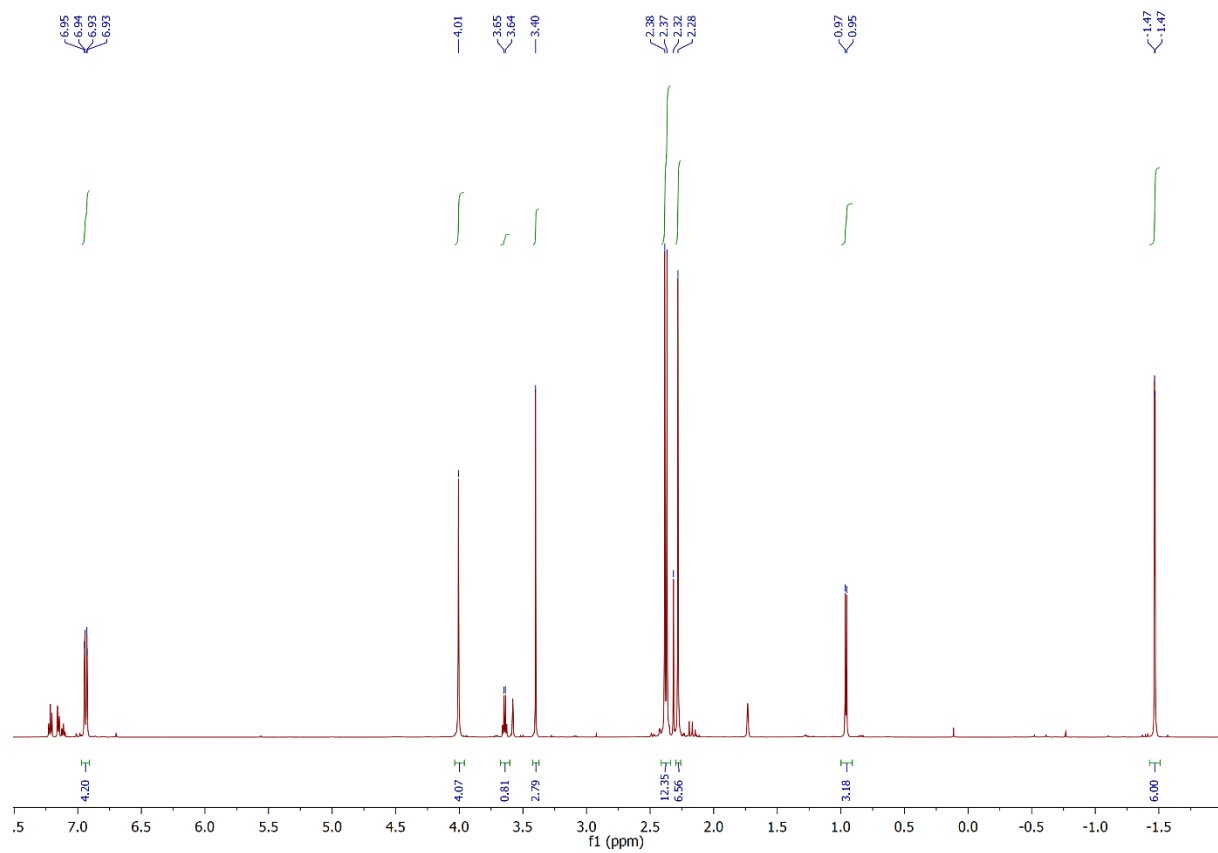

**Figure S12.**  $^1\text{H}$  NMR (THF- $d_8$ , 400 MHz) spectrum of **3** at  $-40^\circ\text{C}$

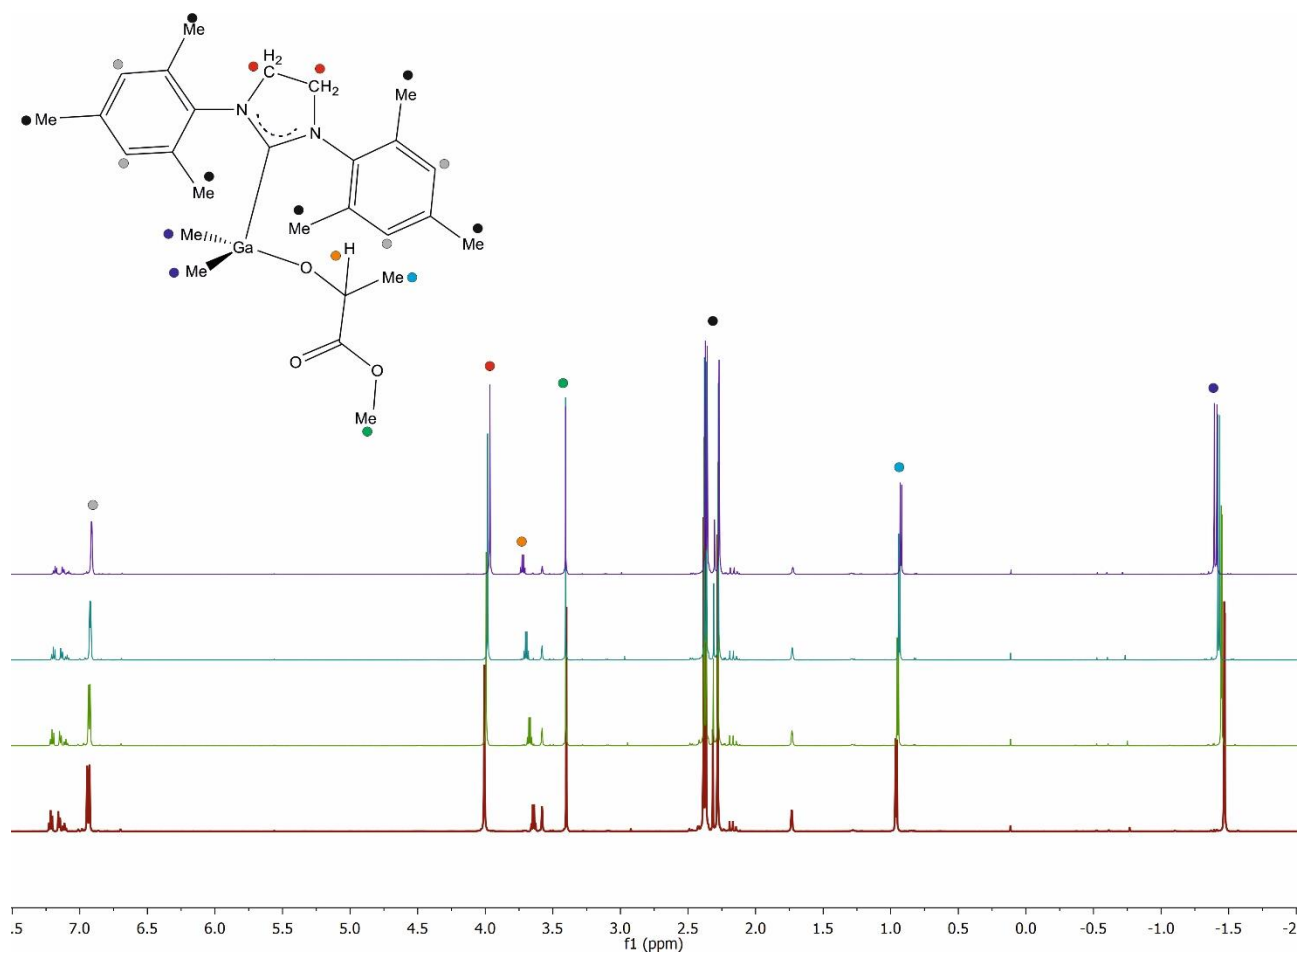

**Figure S13.** VT  $^1\text{H}$  NMR (THF- $d_8$ , 400 MHz) spectra of **3** at r.t. (purple),  $0^\circ\text{C}$  (blue),  $-20^\circ\text{C}$  (green) and  $-40^\circ\text{C}$  (red)

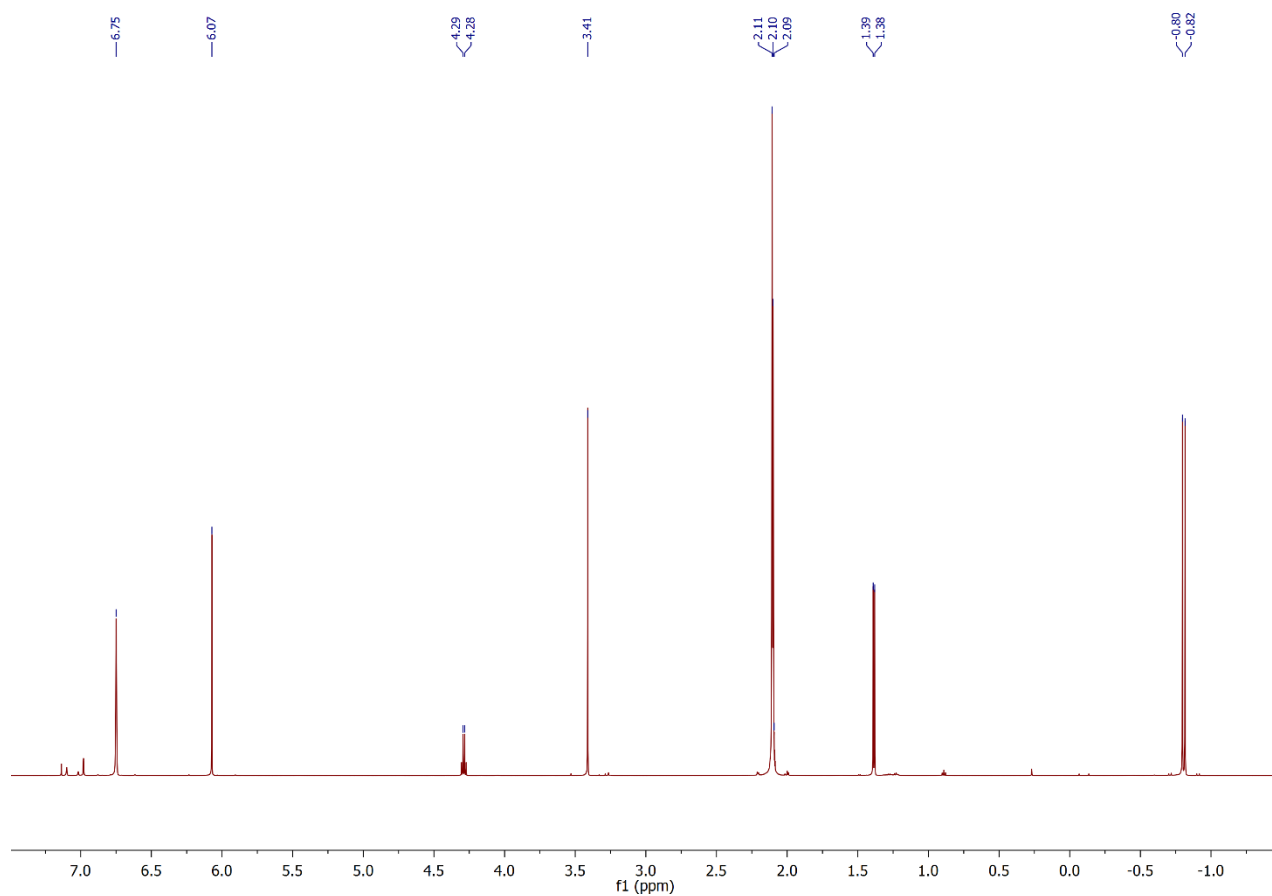

**Figure S14.**  $^1\text{H}$  NMR (toluene- $d_8$ , 400 MHz) spectrum of **4** at r.t.

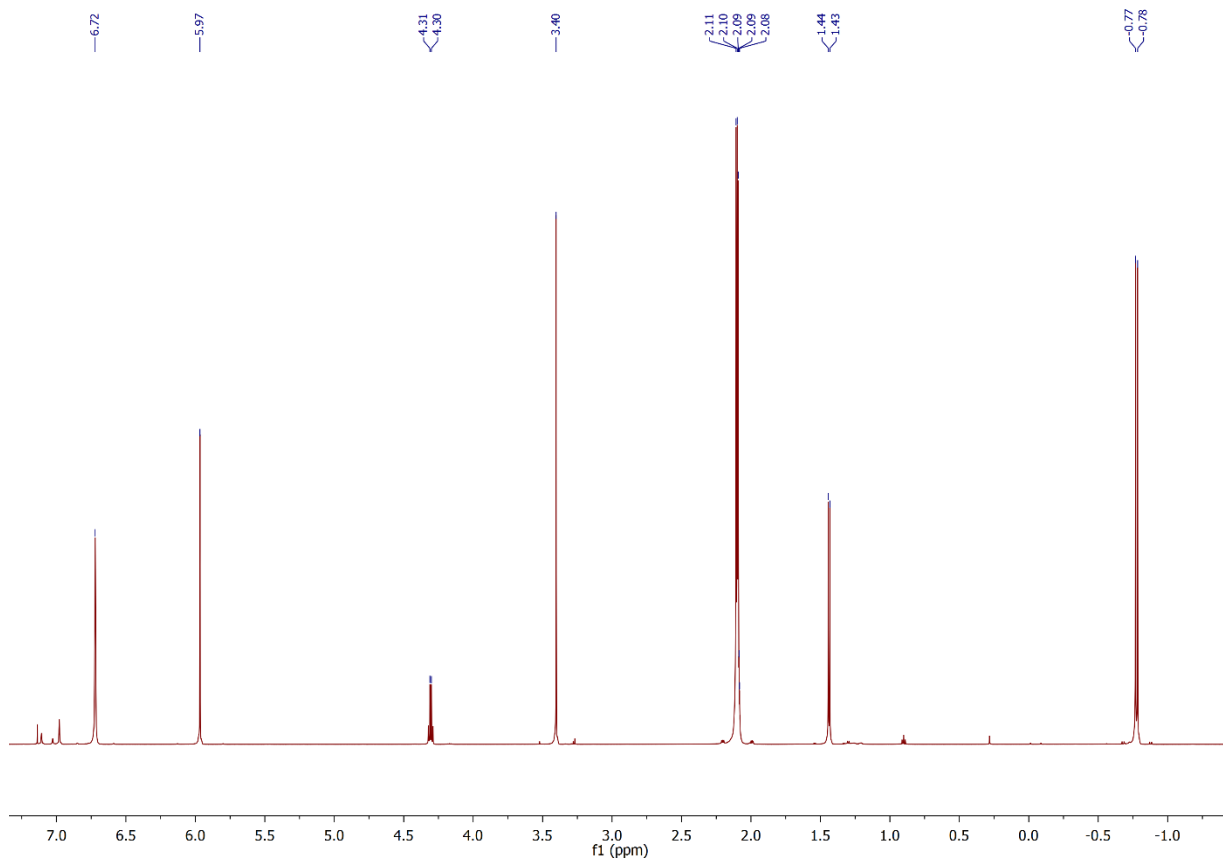

**Figure S15.**  $^1\text{H}$  NMR (toluene- $d_8$ , 400 MHz) spectrum of **4** at  $0^\circ\text{C}$

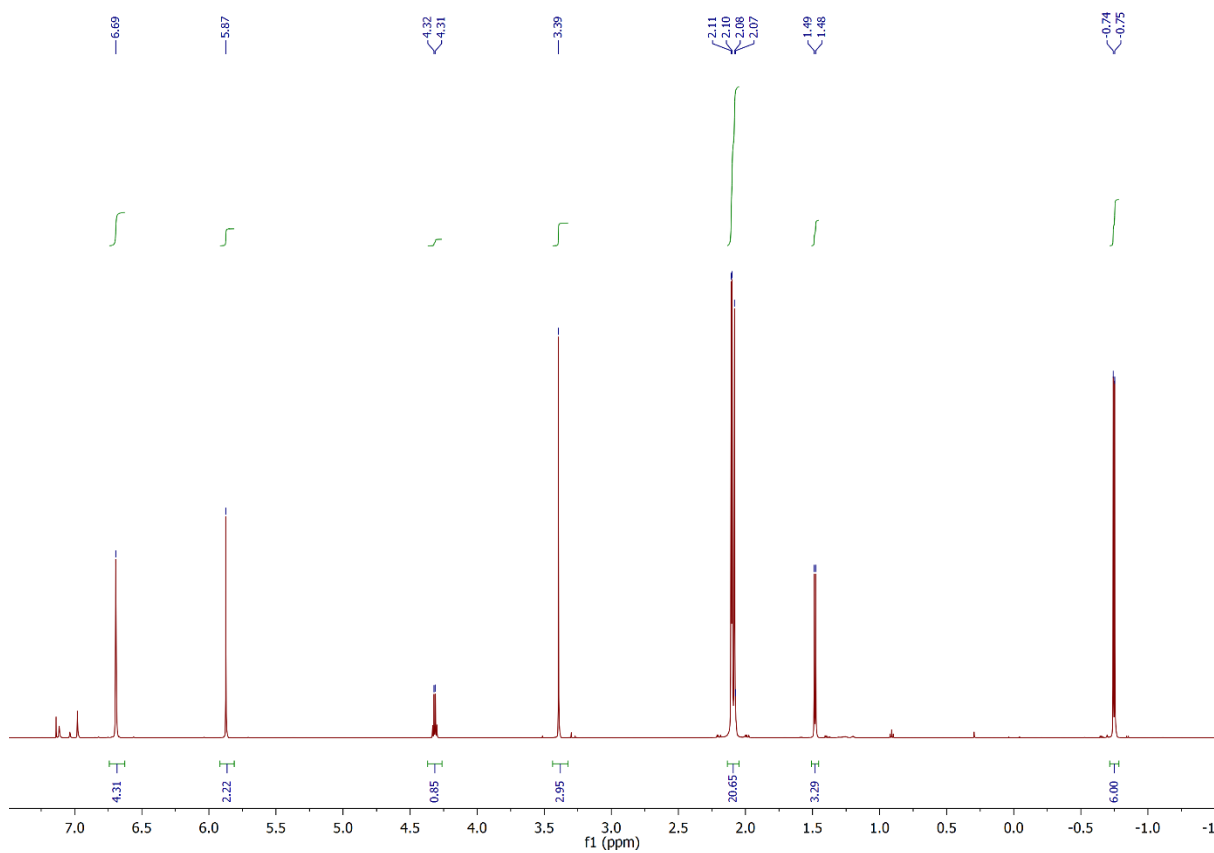

**Figure S16.**  $^1\text{H}$  NMR (toluene- $d_8$ , 400 MHz) spectrum of **4** at  $-20^\circ\text{C}$

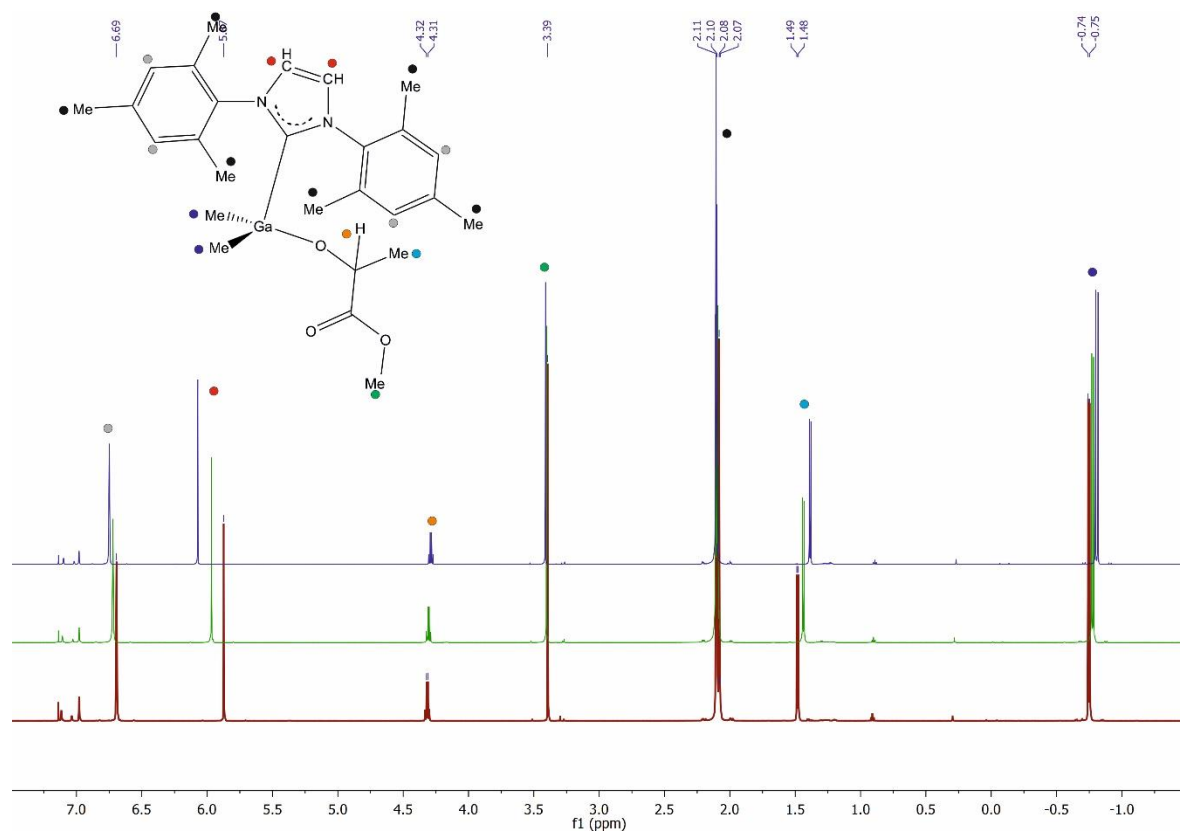

**Figure S17.** VT  $^1\text{H}$  NMR (toluene- $d_8$ , 400 MHz) spectra of **4** at r.t. (blue),  $0^\circ\text{C}$  (green) and  $-20^\circ\text{C}$  (red)

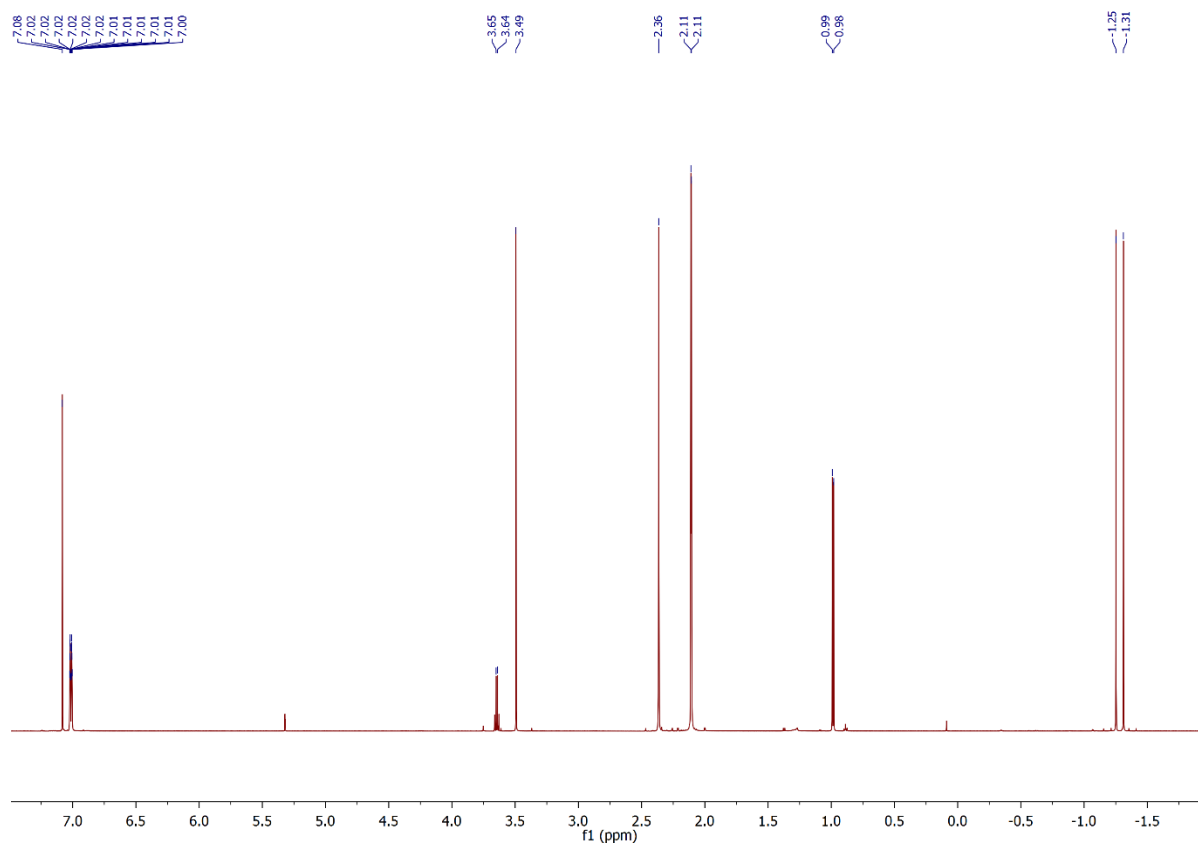

**Figure S18.**  $^1\text{H}$  NMR ( $\text{CD}_2\text{Cl}_2$ , 400 MHz) spectrum of **4** at r.t.

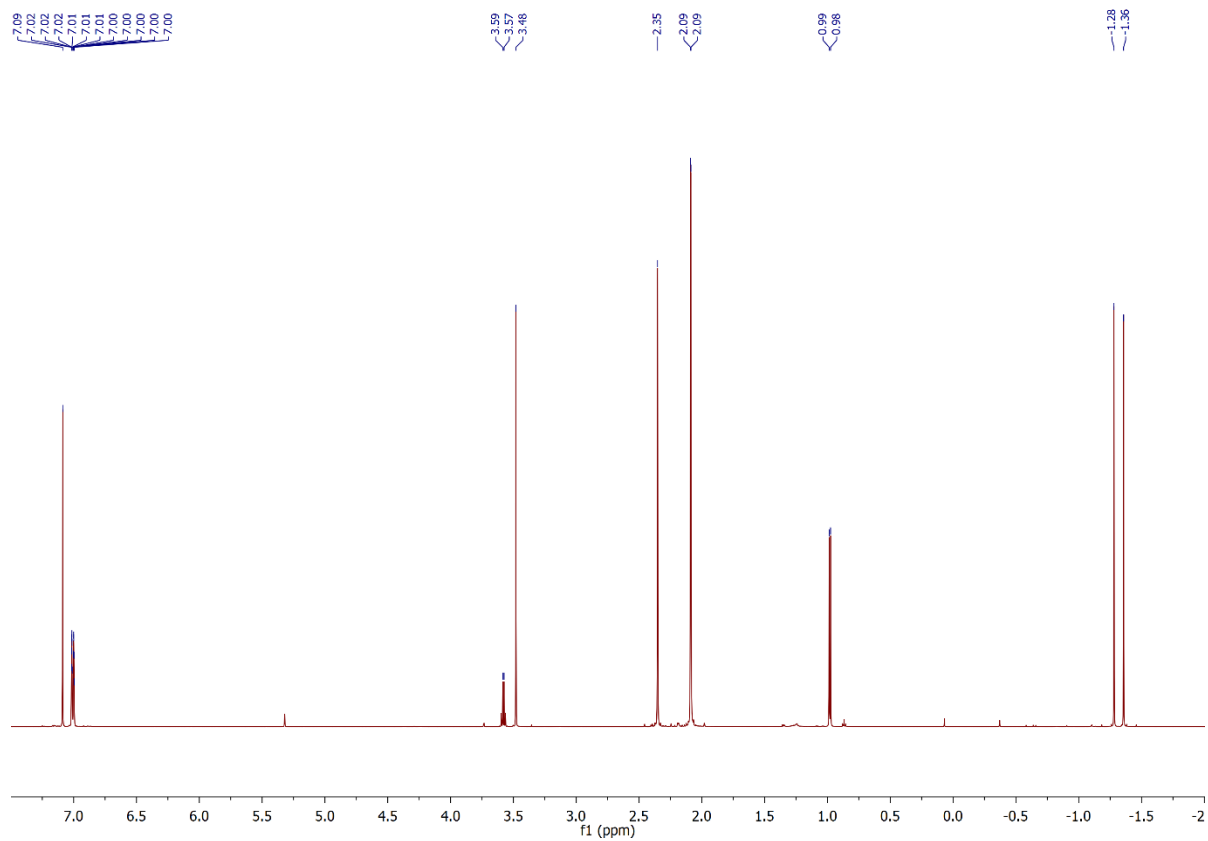

**Figure S19.**  $^1\text{H}$  NMR ( $\text{CD}_2\text{Cl}_2$ , 400 MHz) spectrum of **4** at  $0^\circ\text{C}$

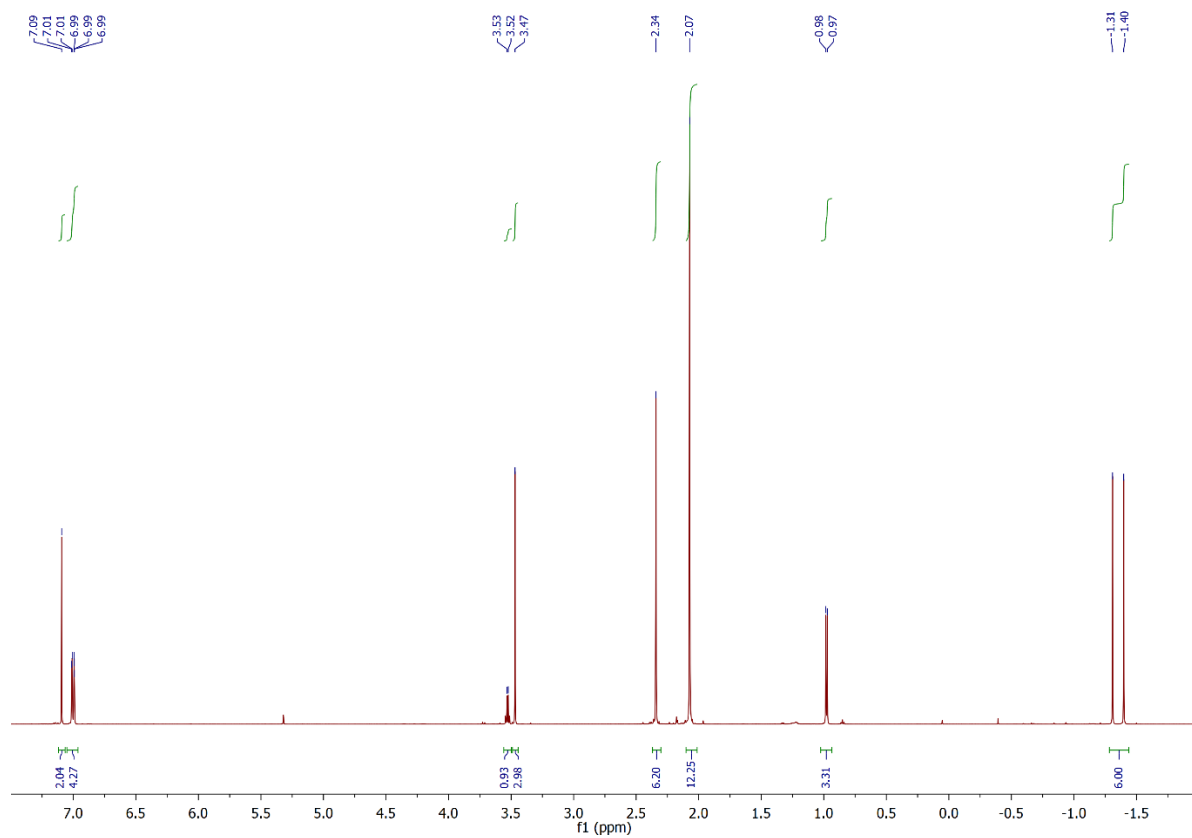

**Figure S20.**  $^1\text{H}$  NMR ( $\text{CD}_2\text{Cl}_2$ , 400 MHz) spectrum of **4** at  $-20^\circ\text{C}$

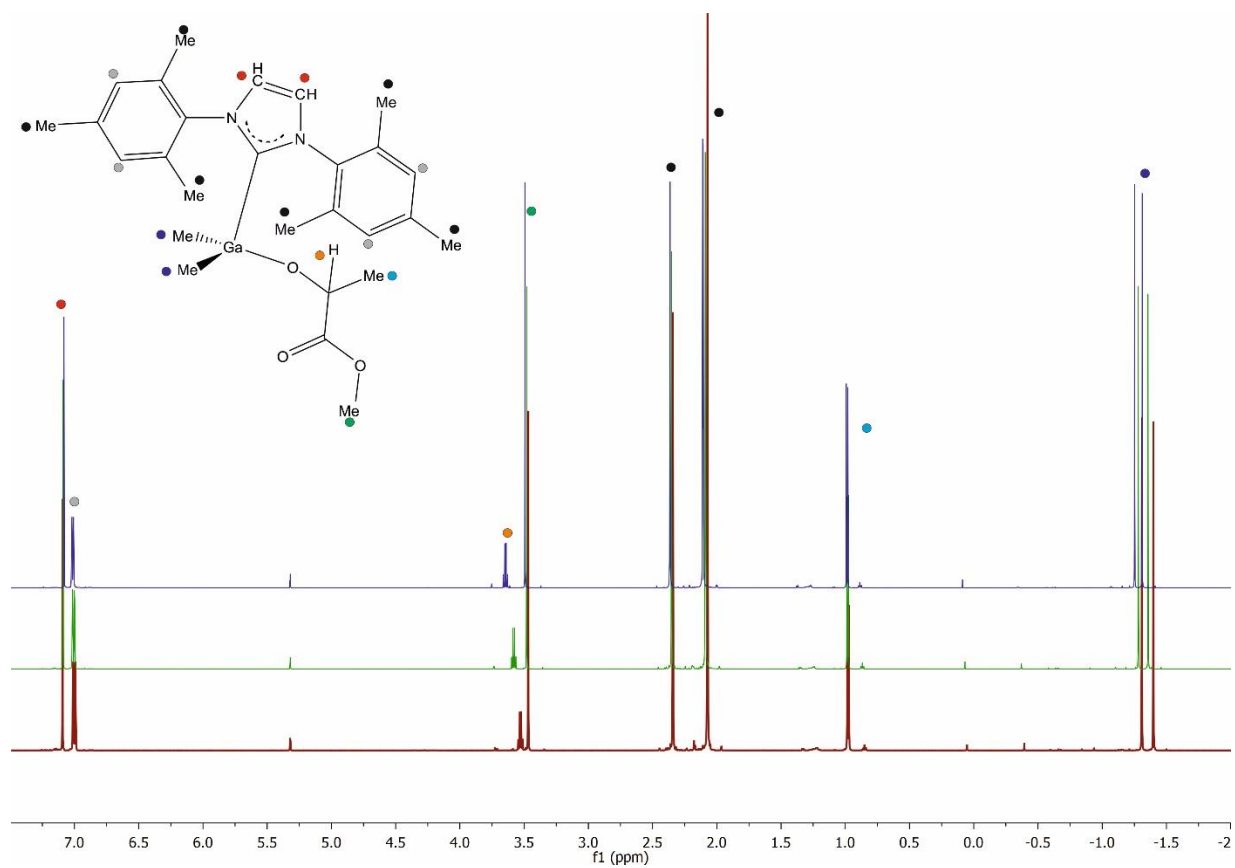

**Figure S21.** VT  $^1\text{H}$  NMR ( $\text{CD}_2\text{Cl}_2$ , 400 MHz) spectra of **4** at r.t. (blue),  $0^\circ\text{C}$  (green) and  $20^\circ\text{C}$  (red)

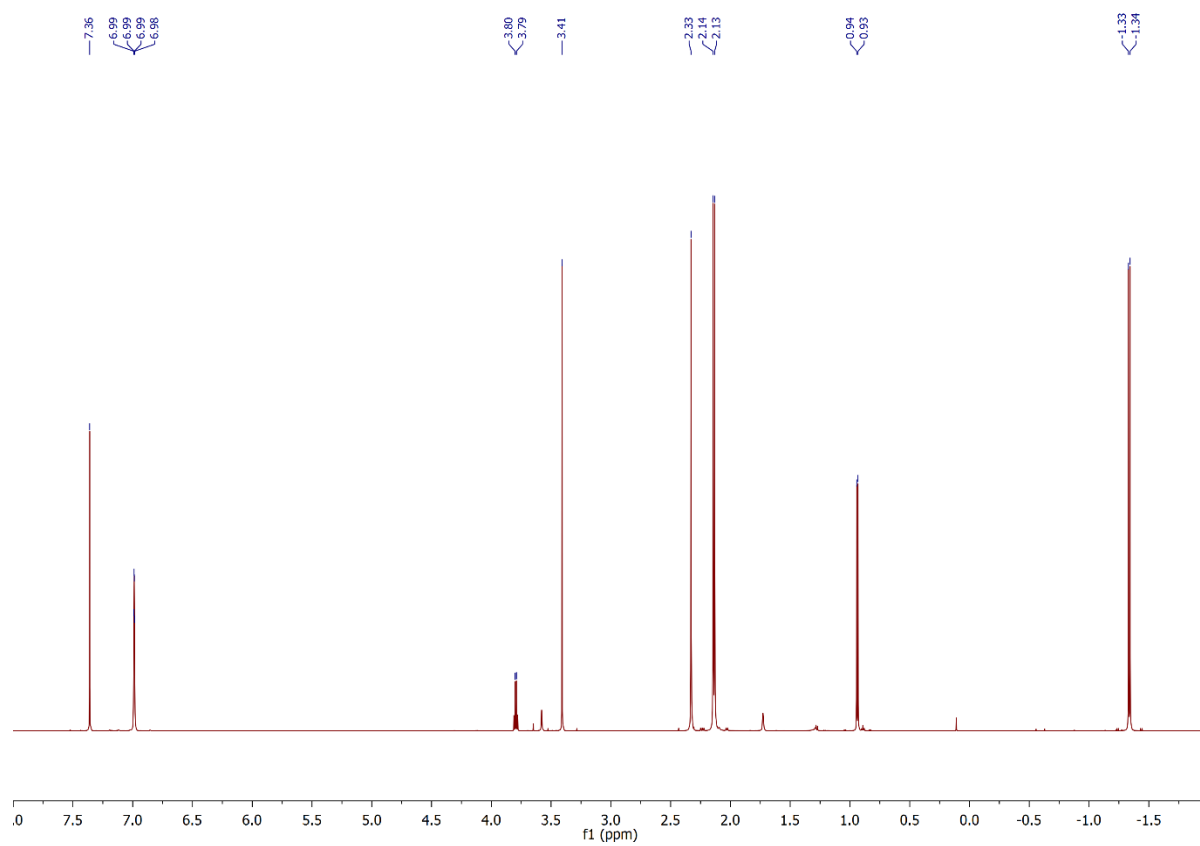

**Figure S22.**  $^1\text{H}$  NMR ( $\text{THF-}d_8$ , 400 MHz) spectrum of **4** at r.t.



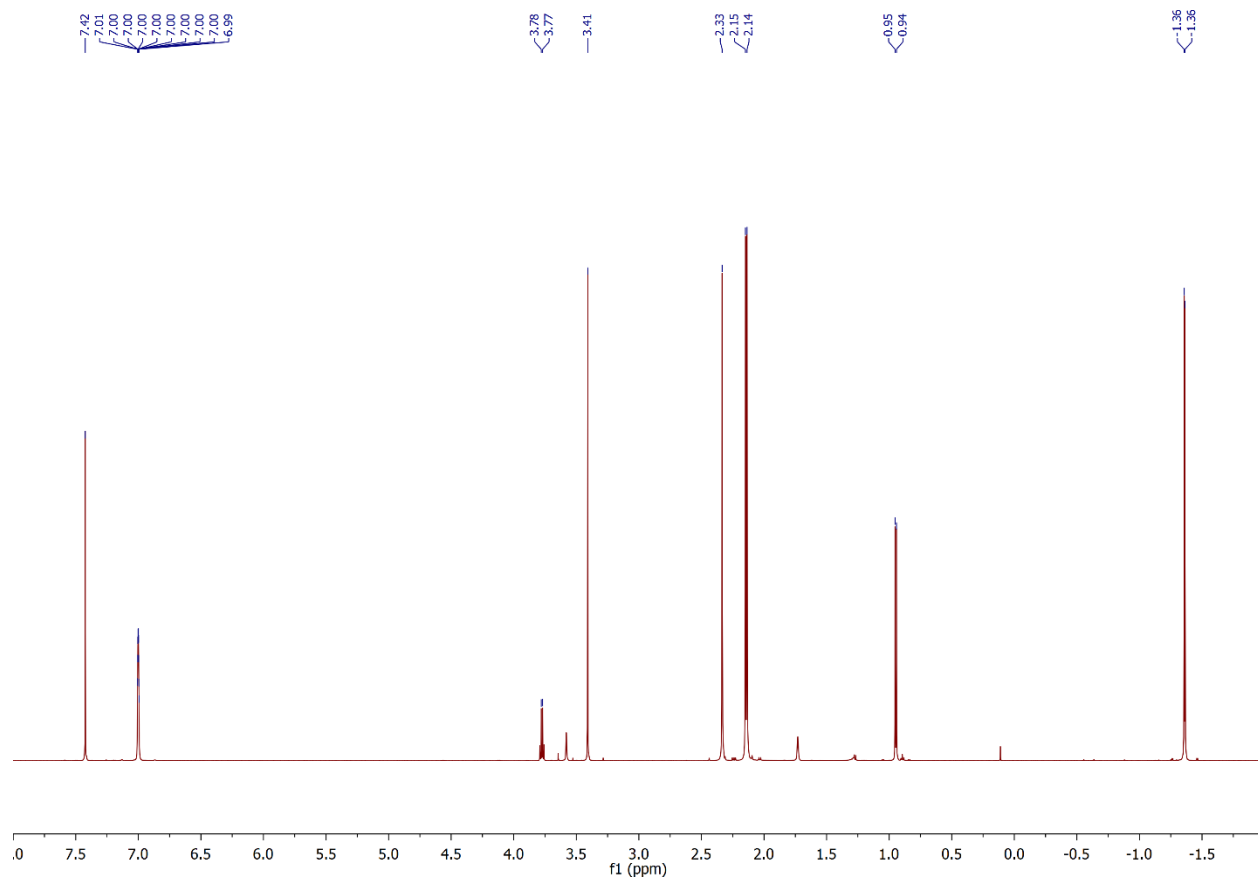

**Figure S23.**  $^1\text{H}$  NMR (THF- $d_8$ , 400 MHz) spectrum of **4** at  $0^\circ\text{C}$

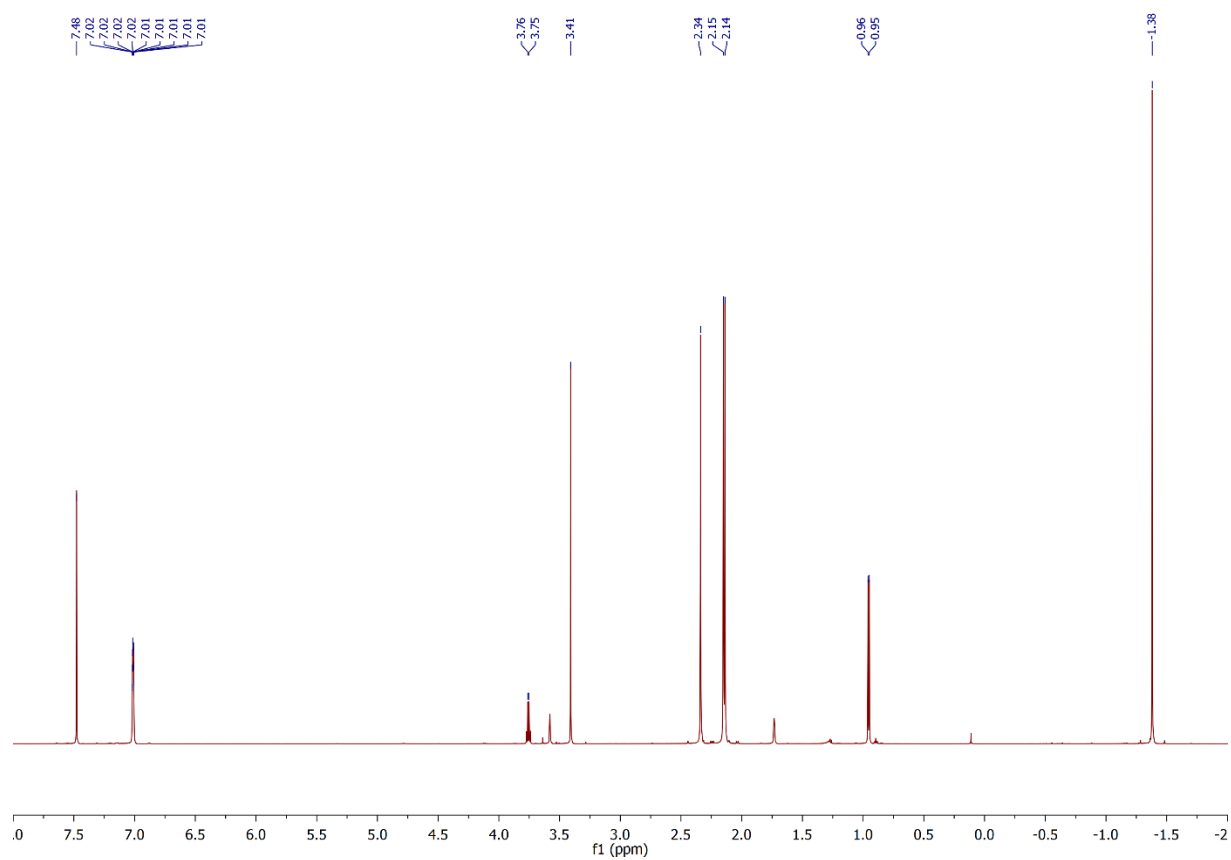

**Figure S24.**  $^1\text{H}$  NMR (THF- $d_8$ , 400 MHz) spectrum of **4** at  $-20^\circ\text{C}$

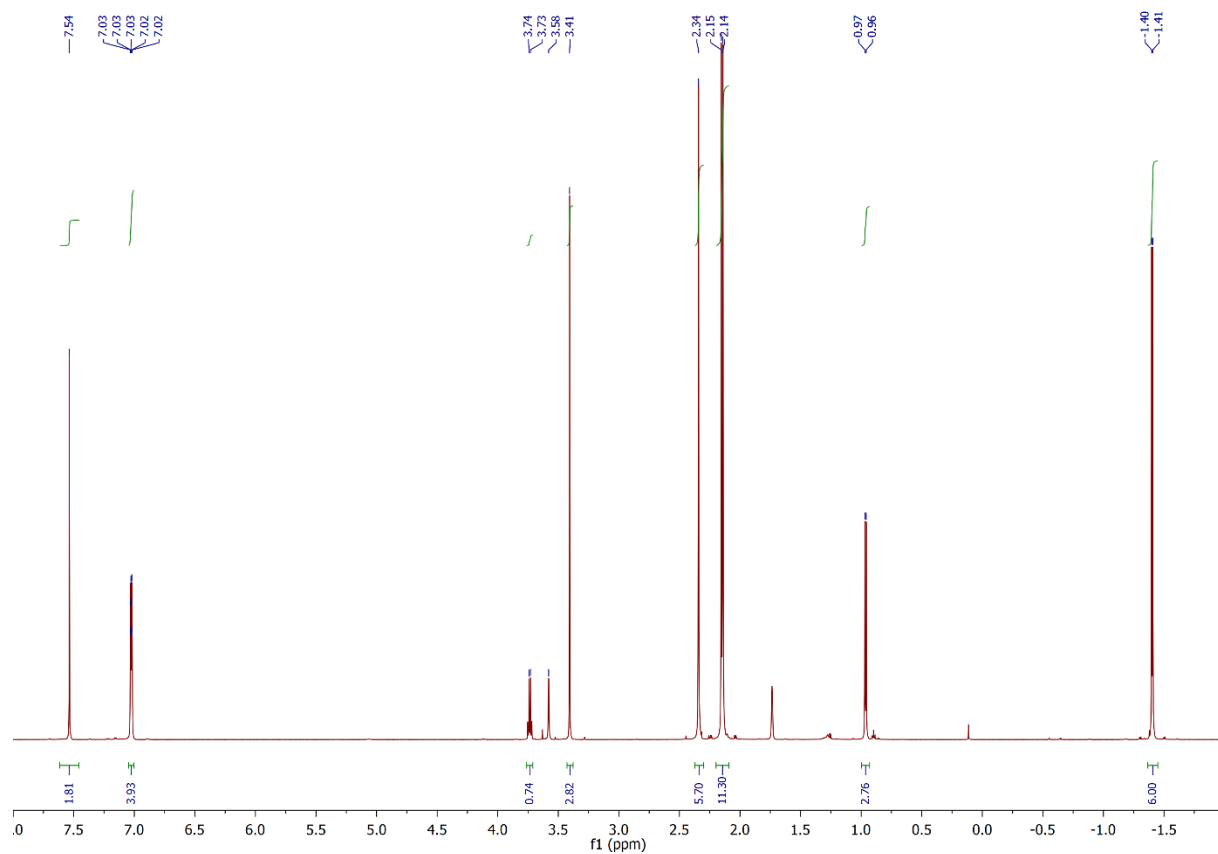

**Figure S25.**  $^1\text{H}$  NMR ( $\text{THF-}d_8$ , 400 MHz) spectrum of **4** at  $-40^\circ\text{C}$

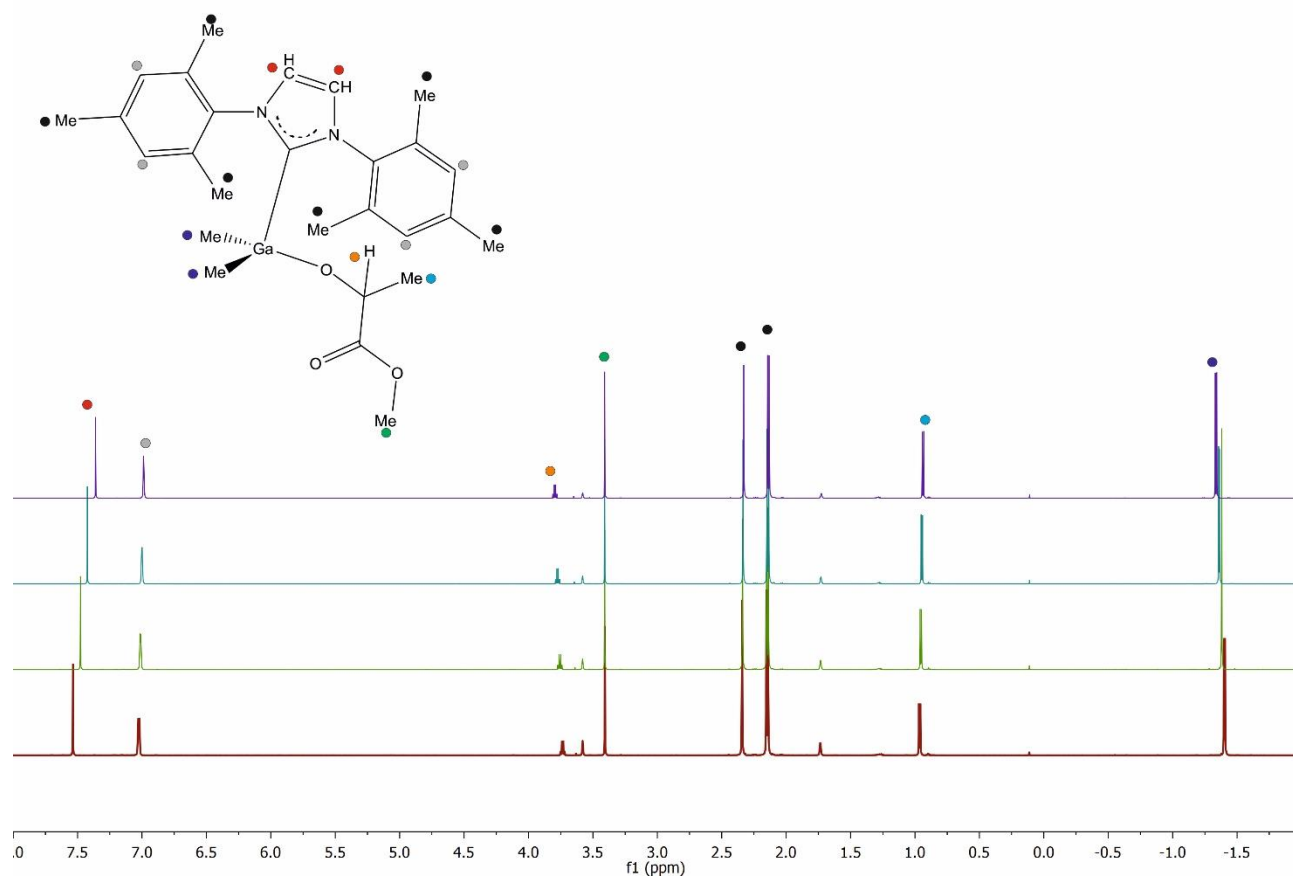

**Figure S26.** VT  $^1\text{H}$  NMR ( $\text{THF-}d_8$ , 400 MHz) spectra of **4** at r.t. (purple),  $0^\circ\text{C}$  (blue),  $-20^\circ\text{C}$  (green) and  $-40^\circ\text{C}$  (red)

## 2) FTIR

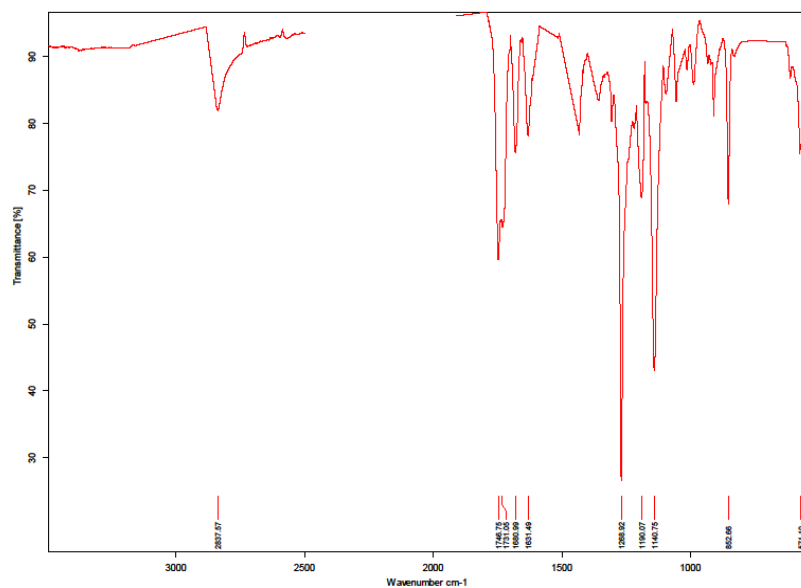

**Figure S27.** FTIR spectrum of 3% solution of complex **3** in toluene.

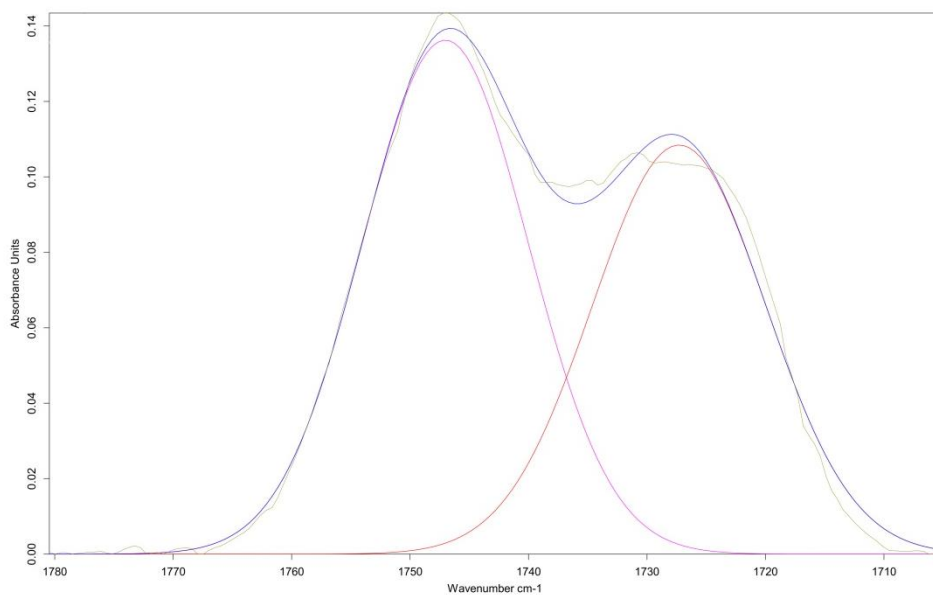

**Figure S28.** FTIR spectrum of 3% solution of complex **3** in toluene. Spectrum of C=O band deconvoluted for two bands **FWHM** – Full Width Half Maximum.

| Peak Position | Absorbance | FWHM      | Area     | Peak Type       |
|---------------|------------|-----------|----------|-----------------|
| 1726.340597   | 0.063908   | 18.316655 | 1.246039 | 0%Lorentz+Gauss |
| 1748.195446   | 0.093912   | 16.482831 | 1.695958 | 6%Lorentz+Gauss |

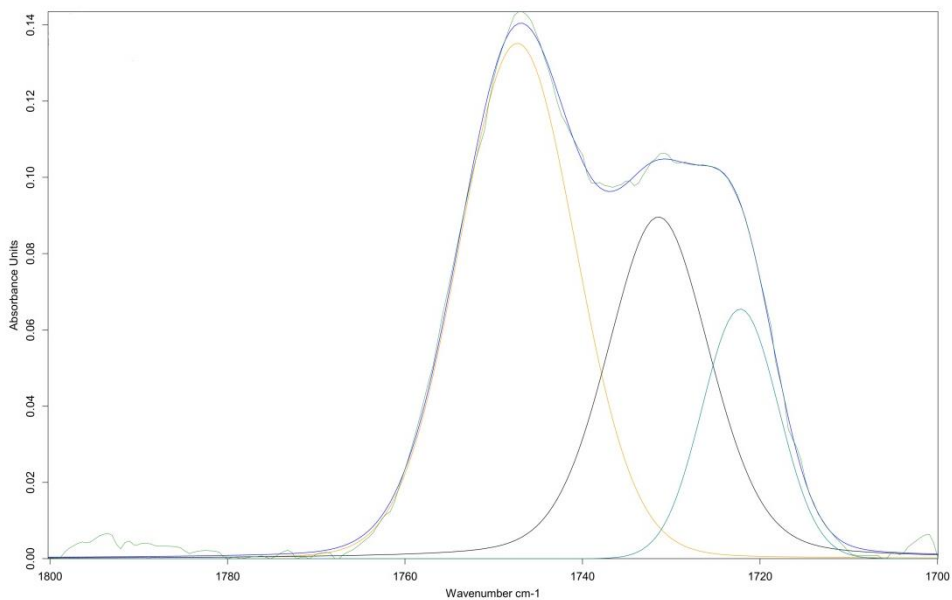

**Figure S29.** FTIR spectrum of 3% solution of complex **3** in toluene. Spectrum of C=O band deconvoluted for three bands.

| Peak Position | Absorbance | FWHM      | Area     | Peak Type        |
|---------------|------------|-----------|----------|------------------|
| 1722.081993   | 0.062386   | 9.754557  | 0.695758 | 16%Lorentz+Gauss |
| 1733.180318   | 0.049468   | 11.306937 | 0.595393 | 0%Lorentz+Gauss  |
| 1748.549451   | 0.096721   | 15.075776 | 1.655648 | 14%Lorentz+Gauss |

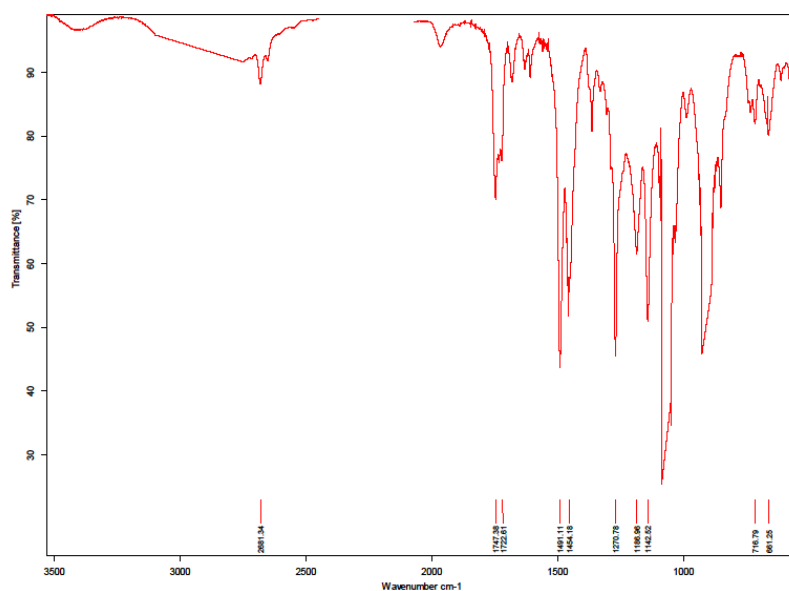

**Figure S30.** FTIR spectrum of 3% solution of complex **3** in THF.

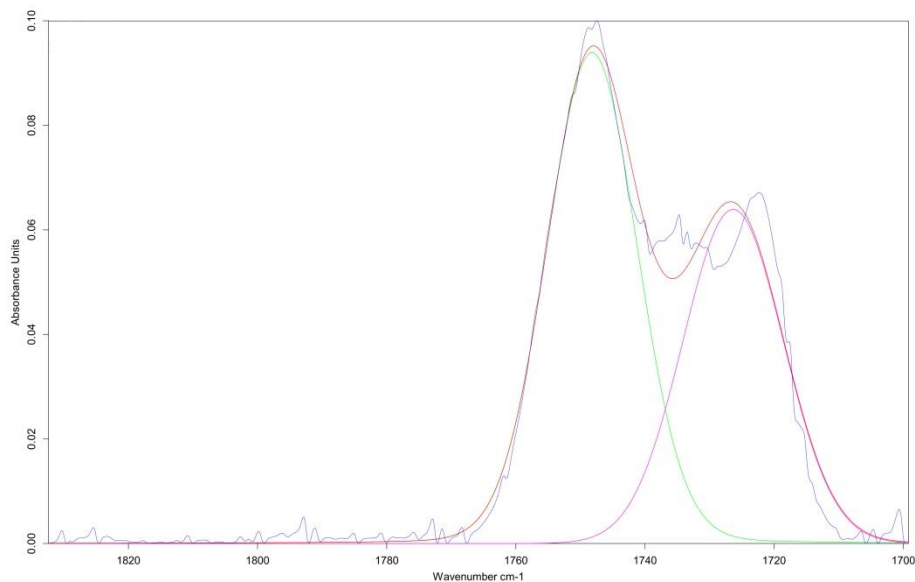

**Figure S31.** FTIR spectrum of 3% solution of complex **3** in THF. Spectrum of C=O band deconvoluted for two bands.

| Peak Position | Absorbance | FWHM      | Area     | Peak Type       |
|---------------|------------|-----------|----------|-----------------|
| 1726.340597   | 0.063908   | 18.316655 | 1.246039 | 0%Lorentz+Gauss |
| 1748.195446   | 0.093912   | 16.482831 | 1.695958 | 6%Lorentz+Gauss |

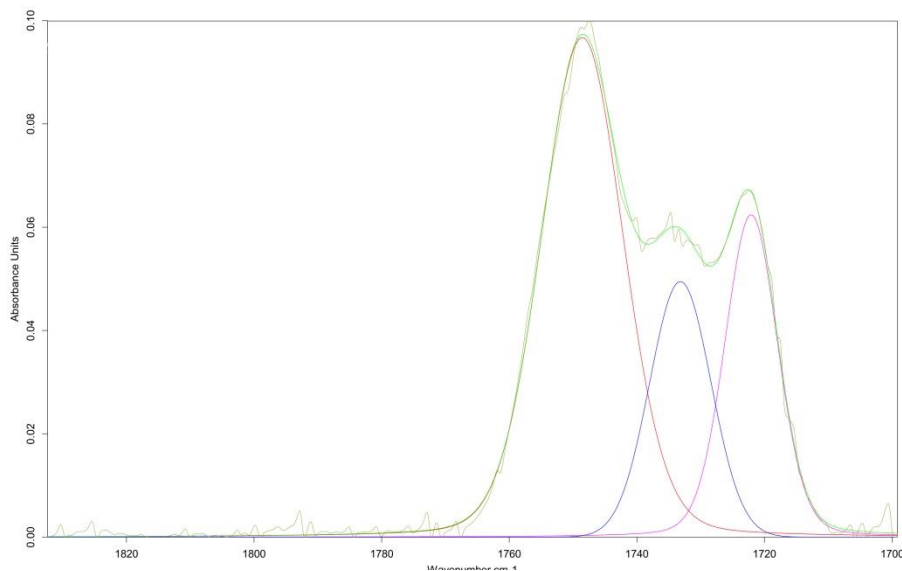

**Figure S32.** FTIR spectrum of 3% solution of complex **3** in THF. Spectrum of C=O band deconvoluted for three bands.

| Peak Position | Absorbance | FWHM      | Area     | Peak Type        |
|---------------|------------|-----------|----------|------------------|
| 1722.081993   | 0.062386   | 9.754557  | 0.695758 | 16%Lorentz+Gauss |
| 1733.180318   | 0.049468   | 11.306937 | 0.595393 | 0%Lorentz+Gauss  |

|             |          |           |          |                  |
|-------------|----------|-----------|----------|------------------|
| 1748.549451 | 0.096721 | 15.075776 | 1.655648 | 14%Lorentz+Gauss |
|-------------|----------|-----------|----------|------------------|

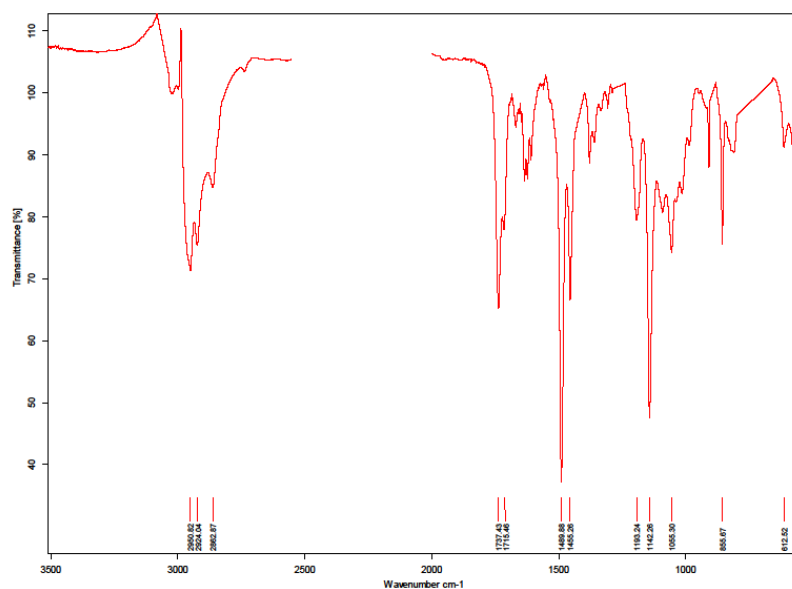

**Figure S33.** FTIR spectrum of 3% solution of complex **3** in  $\text{CH}_2\text{Cl}_2$ .

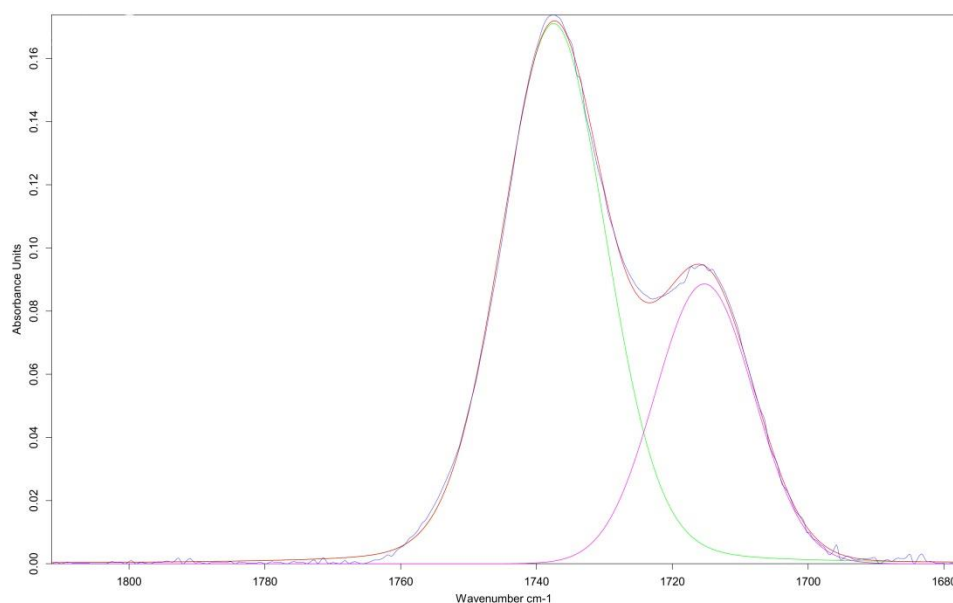

**Figure S34.** FTIR spectrum of 3% solution of complex **3** in  $\text{CH}_2\text{Cl}_2$ . Spectrum of C=O band deconvoluted for two bands.

| Peak Position | Absorbance | FWHM      | Area     | Peak Type        |
|---------------|------------|-----------|----------|------------------|
| 1715.274664   | 0.088592   | 17.110649 | 1.613592 | 0%Lorentz+Gauss  |
| 1737.474323   | 0.171038   | 18.237052 | 3.533763 | 14%Lorentz+Gauss |

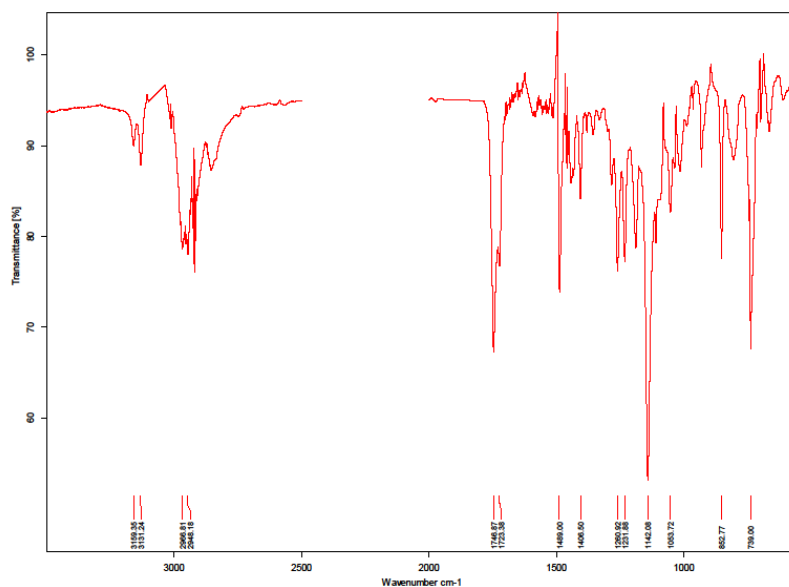

**Figure S35.** FTIR spectrum of 3% solution of complex **4** in toluene.

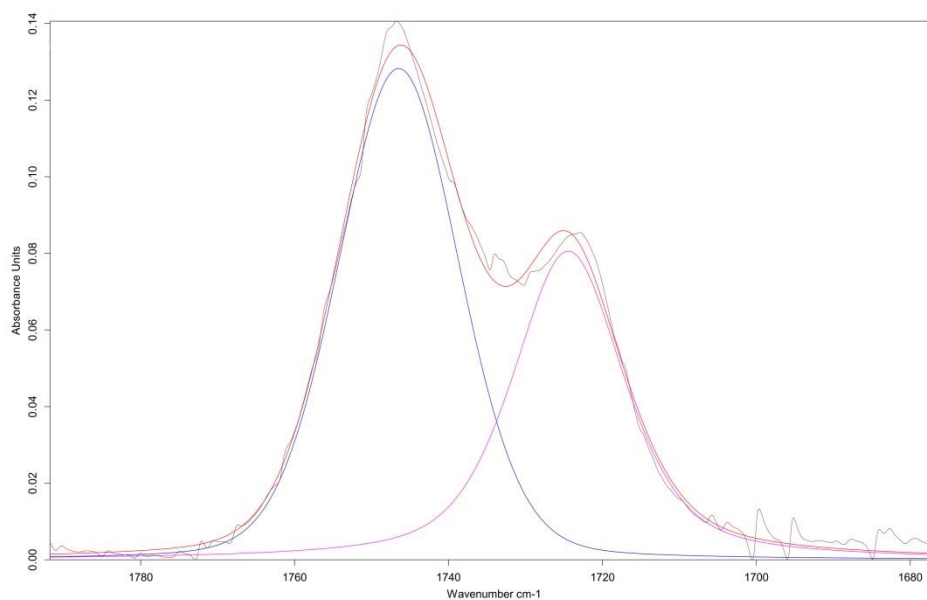

**Figure S36.** FTIR spectrum of 3% solution of complex **4** in toluene. Spectrum of C=O band deconvoluted for two bands.

| Peak Position | Absorbance | FWHM      | Area     | Peak Type         |
|---------------|------------|-----------|----------|-------------------|
| 1724.434753   | 0.080569   | 17.109827 | 1.842607 | 54% Lorentz+Gauss |
| 1746.465898   | 0.128244   | 18.492731 | 2.708876 | 15% Lorentz+Gauss |

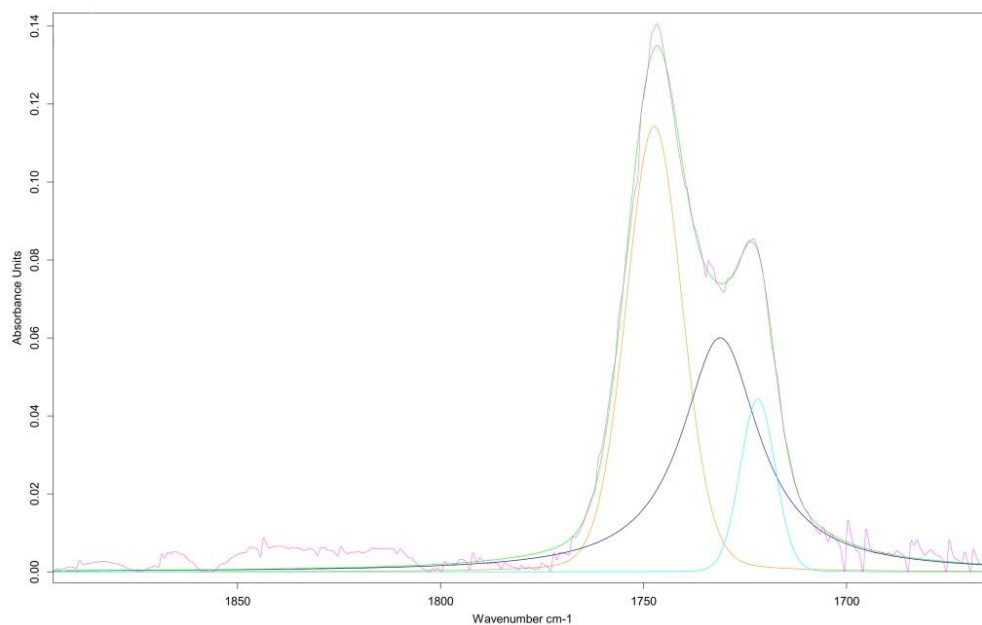

**Figure S37.** FTIR spectrum of 3% solution of complex **4** in toluene. Spectrum of C=O band deconvoluted for three bands.

| Peak Position | Absorbance | FWHM      | Area     | Peak Type          |
|---------------|------------|-----------|----------|--------------------|
| 1721.863847   | 0.044304   | 10.141491 | 0.487971 | 4% Lorentz+Gauss   |
| 1731.105339   | 0.060030   | 22.959413 | 2.164961 | 100% Lorentz+Gauss |
| 1747.369518   | 0.114319   | 16.265737 | 2.105625 | 13% Lorentz+Gauss  |

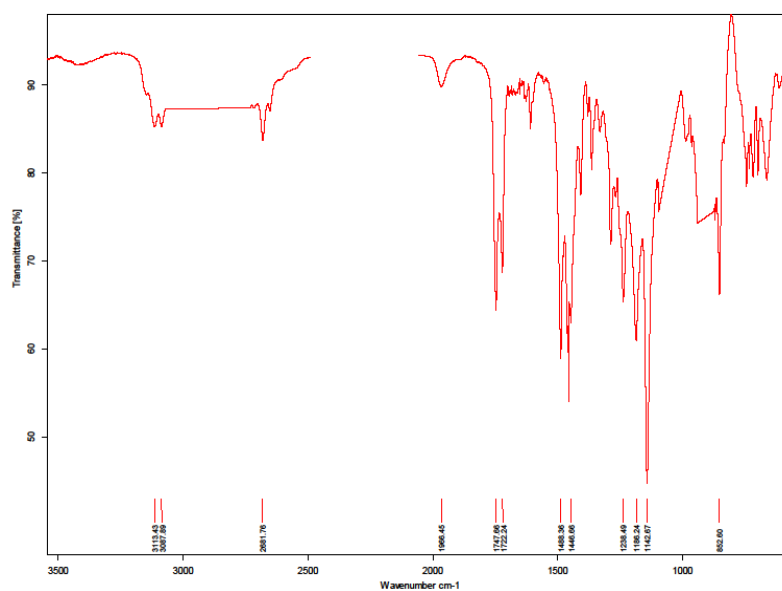

**Figure S38.** FTIR spectrum of 3% solution of complex **4** in THF.



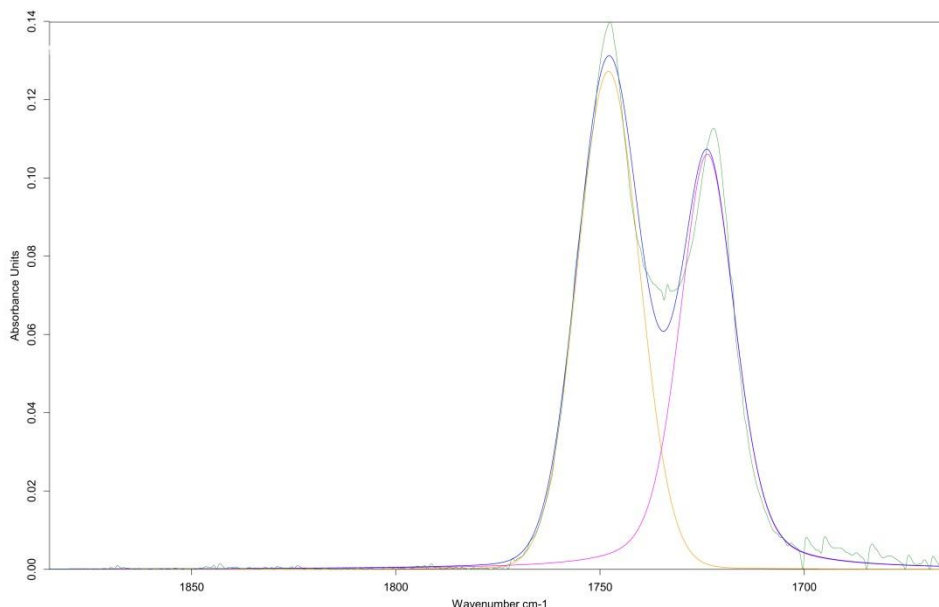

**Figure S39.** FTIR spectrum of 3% solution of complex **4** in THF. Spectrum of C=O band deconvoluted for two bands.

| Peak Position | Absorbance | FWHM      | Area     | Peak Type         |
|---------------|------------|-----------|----------|-------------------|
| 1723.709394   | 0.106060   | 16.120654 | 2.134105 | 36% Lorentz+Gauss |
| 1747.924977   | 0.127205   | 17.978735 | 2.471268 | 3% Lorentz+Gauss  |

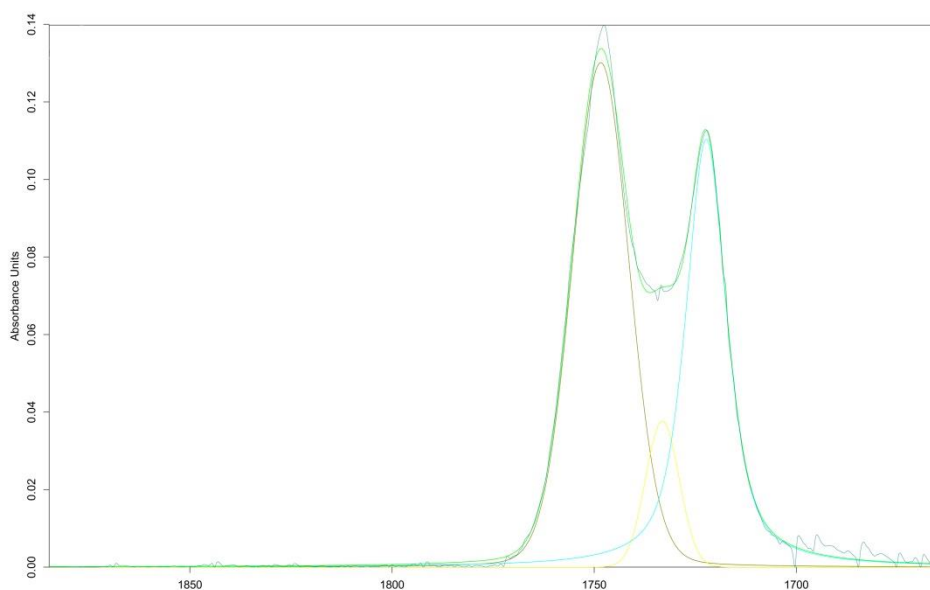

**Figure S40.** FTIR spectrum of 3% solution of complex **4** in THF. Spectrum of C=O band deconvoluted for three bands.

| Peak Position | Absorbance | FWHM      | Area     | Peak Type         |
|---------------|------------|-----------|----------|-------------------|
| 1722.285661   | 0.110339   | 12.014184 | 1.841557 | 64% Lorentz+Gauss |
| 1733.142974   | 0.037659   | 9.835361  | 0.394268 | 0% Lorentz+Gauss  |
| 1748.379309   | 0.130130   | 16.522038 | 2.384595 | 9% Lorentz+Gauss  |

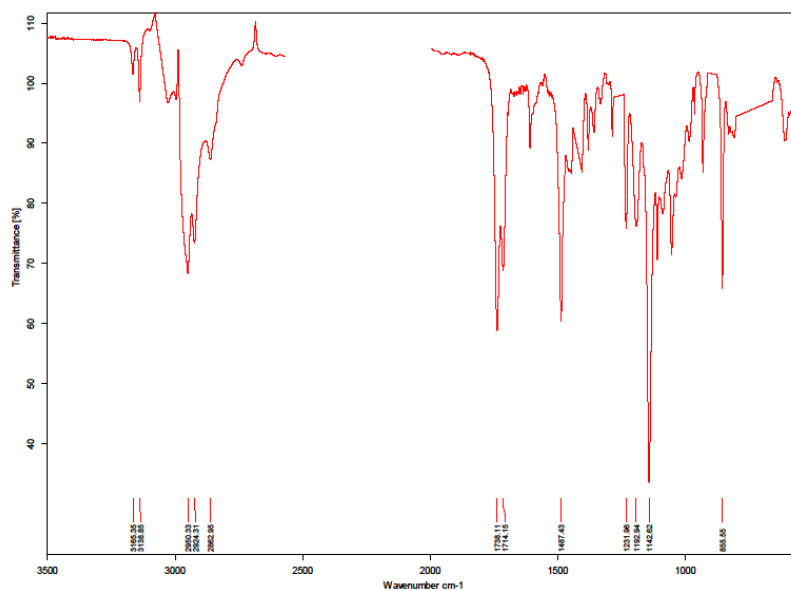

**Figure S41.** . FTIR spectrum of 3% solution of complex **4** in CH<sub>2</sub>Cl<sub>2</sub>.

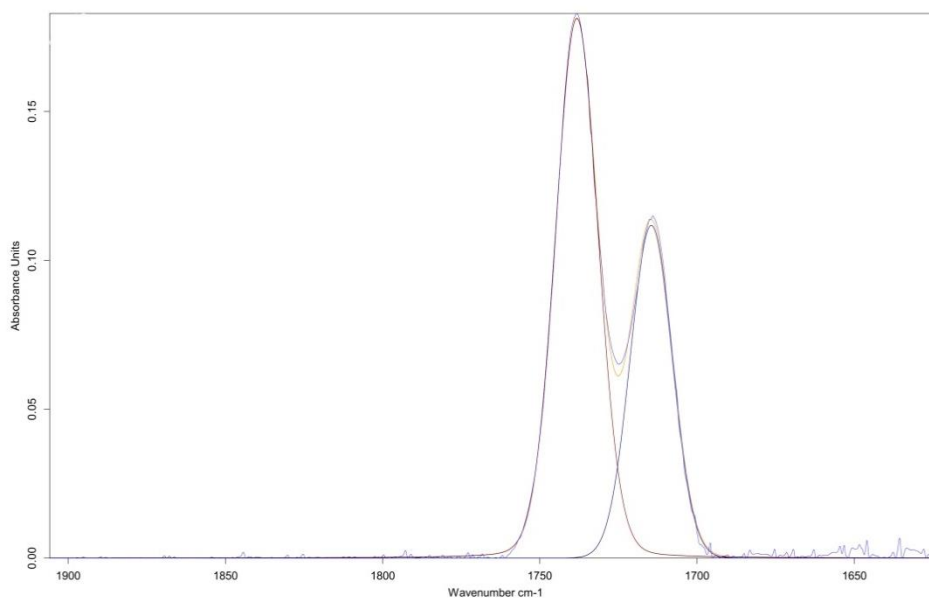

**Figure S42.** FTIR spectrum of 3% solution of complex **4** in CH<sub>2</sub>Cl<sub>2</sub>. Spectrum of C=O band deconvoluted for two bands.

| Peak Position | Absorbance | FWHM      | Area     | Peak Type        |
|---------------|------------|-----------|----------|------------------|
| 1714.579417   | 0.111738   | 15.692485 | 1.866484 | 0% Lorentz+Gauss |
| 1738.245088   | 0.181180   | 15.896046 | 3.190238 | 9% Lorentz+Gauss |

### 3) Polymerization data

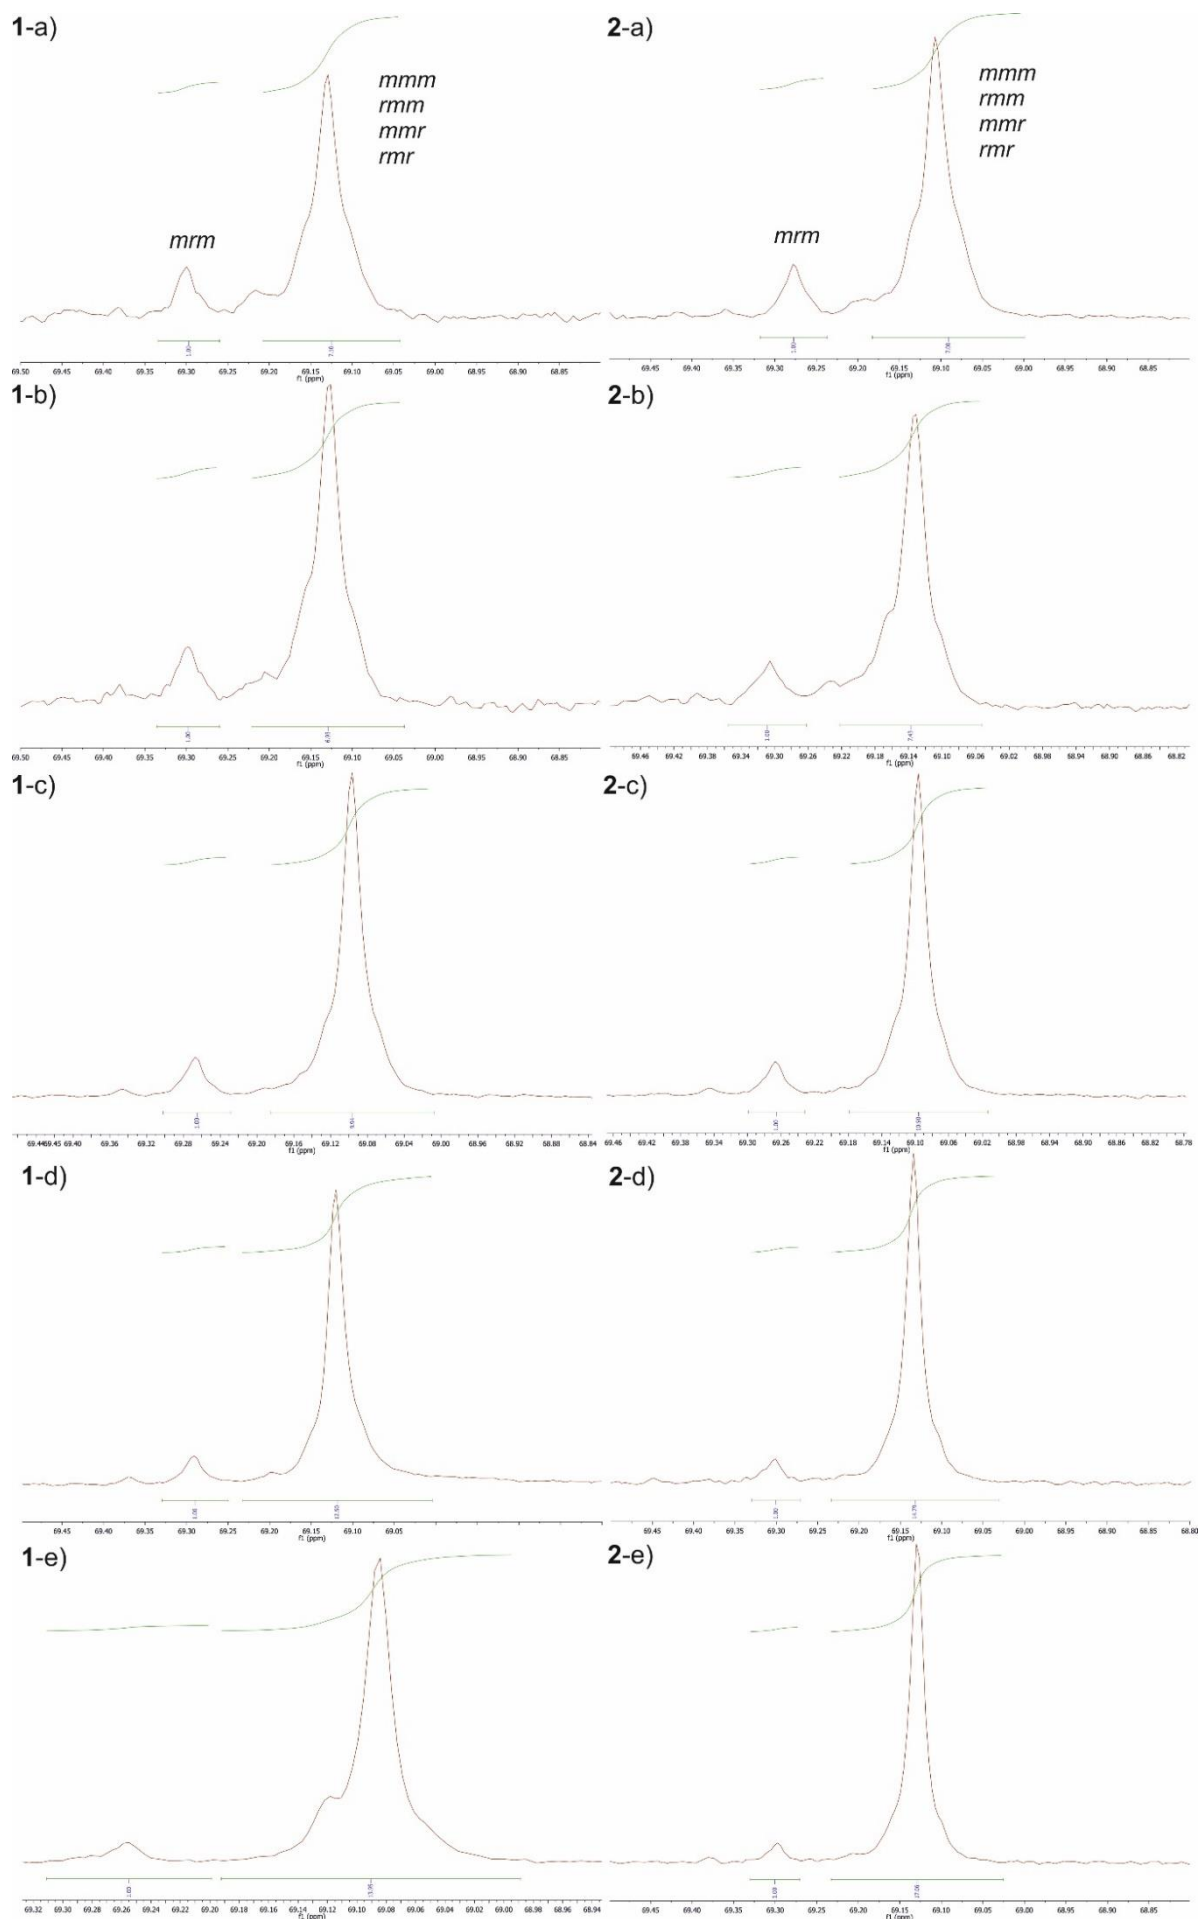

**Figure S43** <sup>13</sup>C NMR (CDCl<sub>3</sub>, 100 MHz) spectra of the methine region of PLA prepared by polymerization of *rac*-LA with 1 and 2 in toluene at: 40°C (a), r.t. (b), 0°C (c), -20°C (d), -40°C (e)

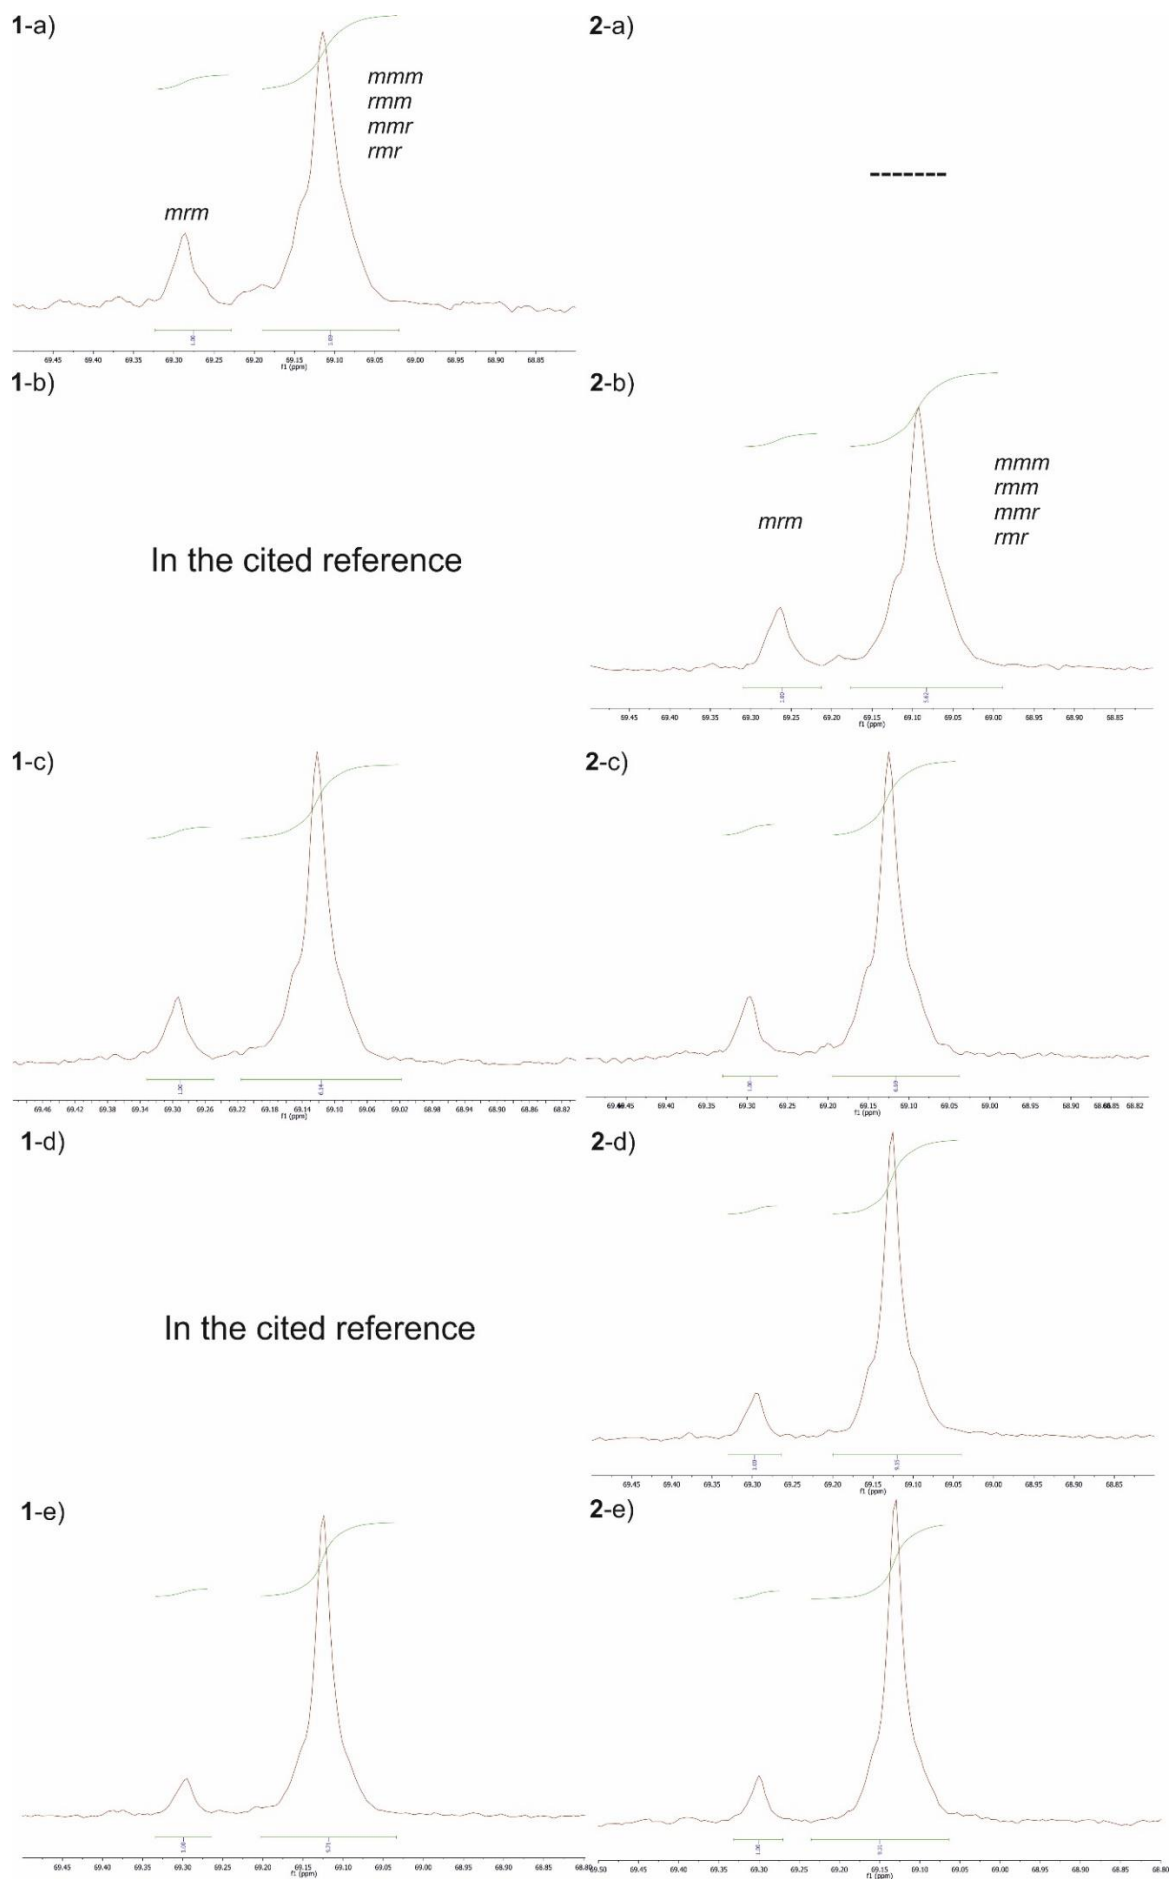

**Figure S44**  $^{13}\text{C}$  NMR ( $\text{CDCl}_3$ , 100 MHz) spectra of the methine region of PLA prepared by polymerization of *rac*-LA with **1** and **2** in  $\text{CH}_2\text{Cl}_2$  at: 40°C (a), r.t. (b), 0°C (c), -20°C (d), -40°C (e)

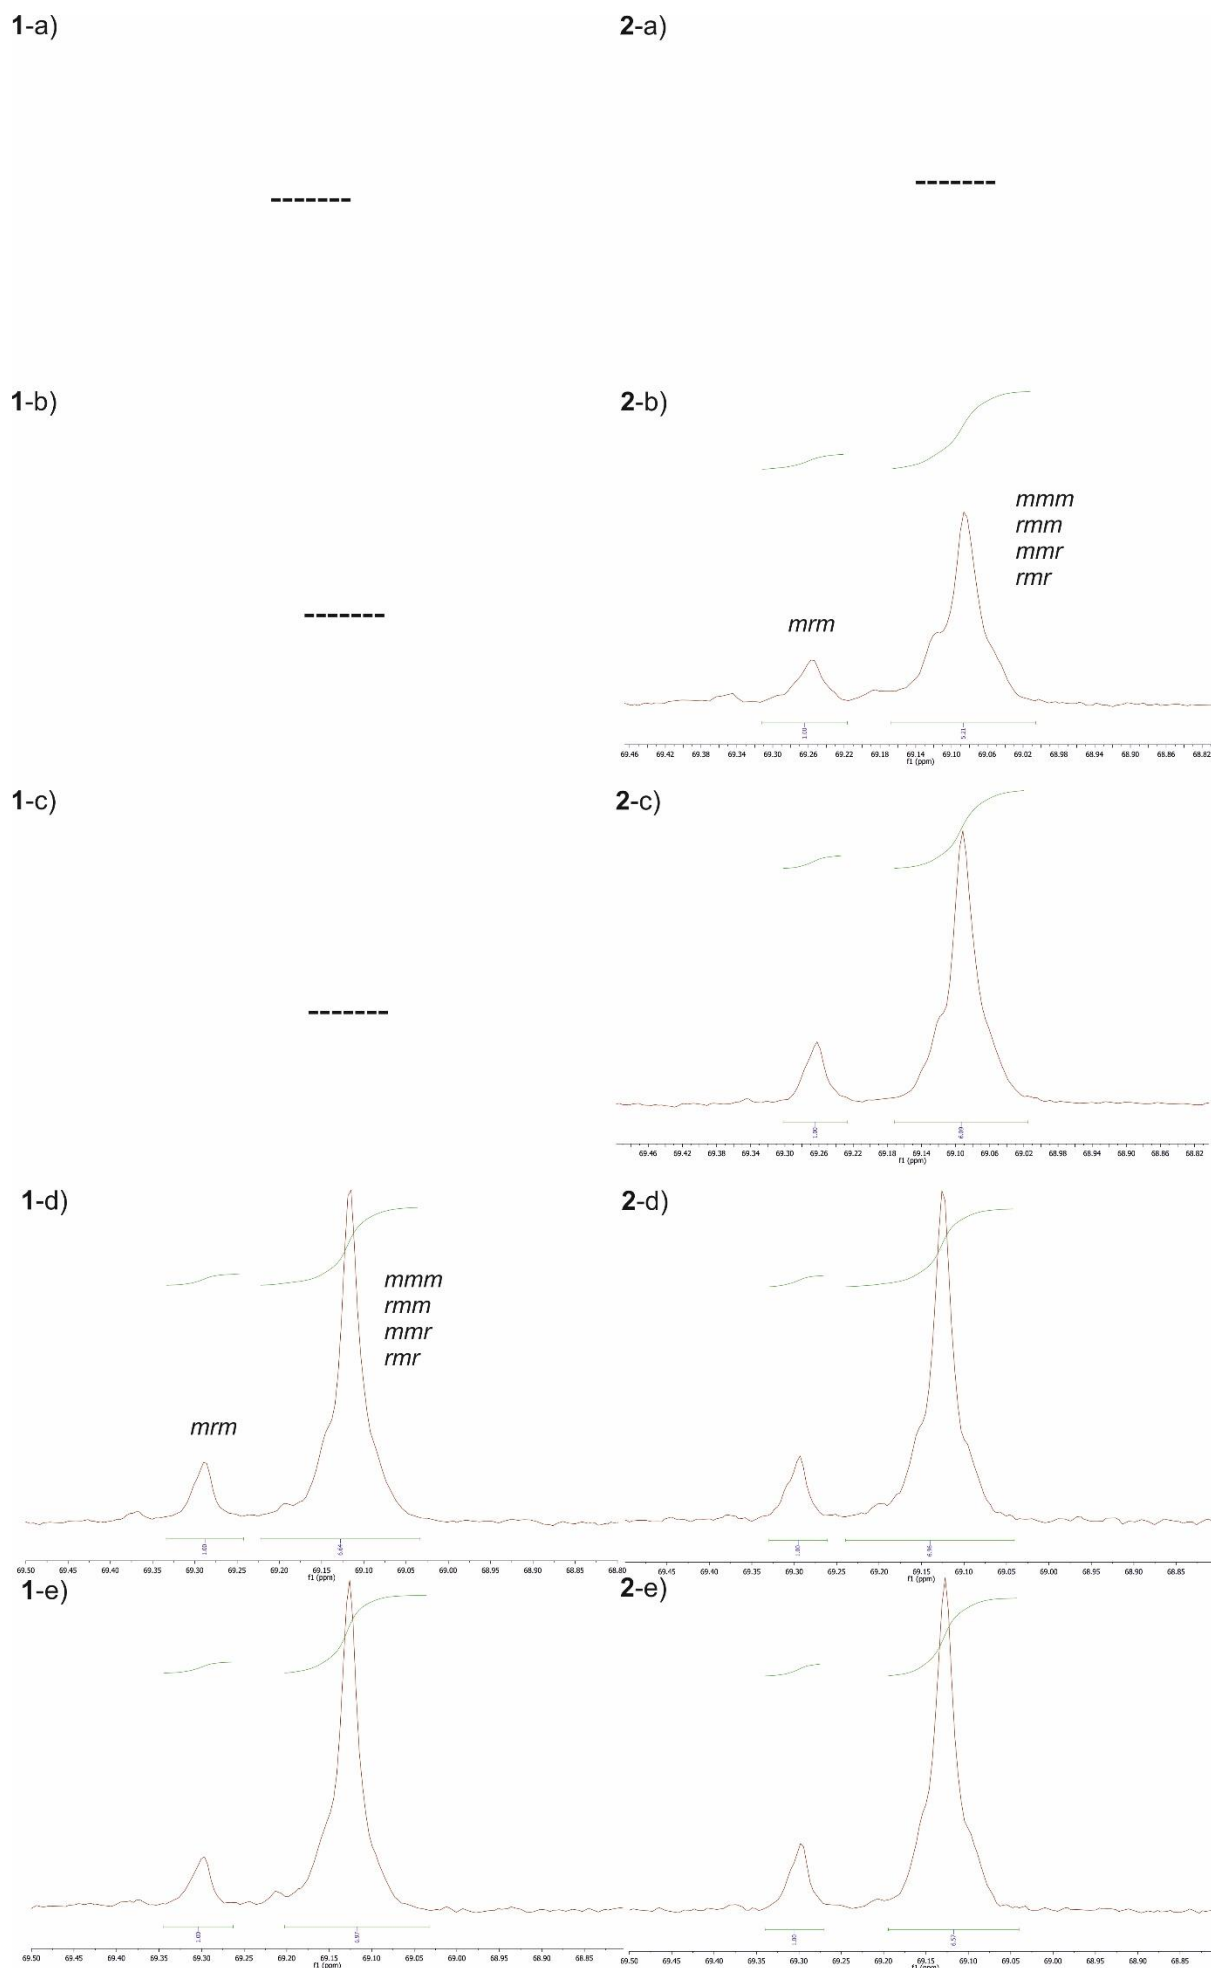

**Figure S45**  $^{13}\text{C}$  NMR (CDCl<sub>3</sub>, 100 MHz) spectra of the methine region of PLA prepared by polymerization of *rac*-LA with **1** and **2** in THF at: 40°C (a), r.t. (b), 0°C (c), -20°C (d), -40°C (e)

#### 4) MALDI-TOF and GPC of PLA obtained with complexes 1 and 3

polytool

Date: 12/23/2021 Time: 16:42

FileName: ...M-1.0\_DCTB\_K\_RP700-3500\_P36\_c5\0\_K16\1\1SRef\data\1\peaklist.xml  
 peak integrals - NM 1.0 (CHCl3)  
 DCTB+K RP 700-3500 Da P=36% c=5

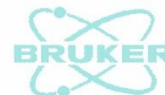

\* 1000

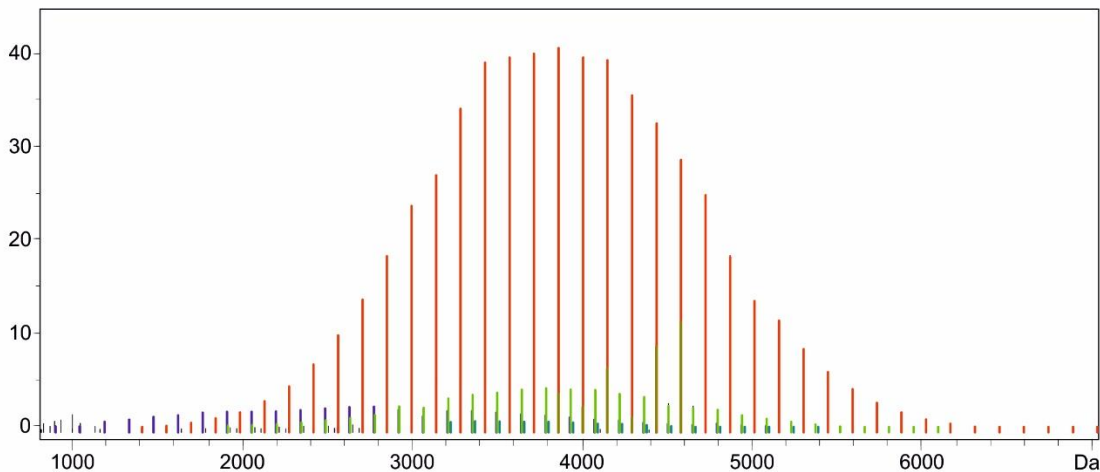

| n | ser. | rep.unit | resid.   | end1 | end2 | cation  | Mn      | Mw      | pd      | DP      | % I. | cnt |
|---|------|----------|----------|------|------|---------|---------|---------|---------|---------|------|-----|
| 1 | 1    | 144.054  | 76.0954  |      |      | 38.9637 | 3848.65 | 4014.98 | 1.04322 | 26.7168 | 74.7 | 40  |
| 2 | 2    | 144.054  | -0.61353 |      |      | 38.9637 | 2640.04 | 3026.08 | 1.14622 | 18.3268 | 5.7  | 31  |
| 3 | 3    | 144.054  | 3.35827  |      |      | 38.9637 | 3831.29 | 3996.39 | 1.04309 | 26.5963 | 8.3  | 30  |
| 4 | 4    | 144.054  | 18.0490  |      |      | 38.9637 | 3964.42 | 4043.65 | 1.01999 | 27.5205 | 1.5  | 16  |
| 5 | 5    | 144.054  | 74.0545  |      |      | 38.9637 | 4144.76 | 4161.70 | 1.00409 | 28.7723 | 2.2  | 6   |

Traces

D:\Dane\Mass\_Spectra\Rok\_2021\Work\NM-1.0\_DCTB\_K\_RP700-3500\_P36\_c5\0\_K16\1\1SRef

Comment 1 NM 1.0 (CHCl3)  
 Comment 2 DCTB+K RP 700-3500 Da P=36% c=5

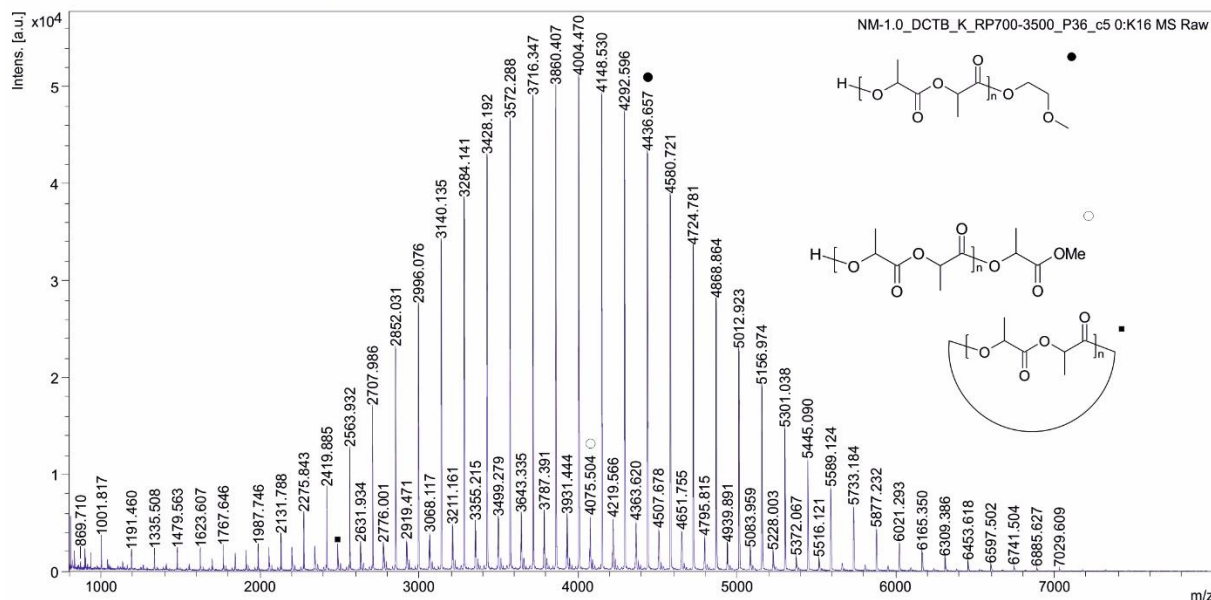

Bruker Daltonics flexAnalysis

page 1 of 1  
 printed: 12/23/2021 16:39:38

**Figure S46.** MALDI-TOF spectrum of PLA obtained with **1** in toluene at 40°C, Table 1, entry 1. Figure 1 (→)

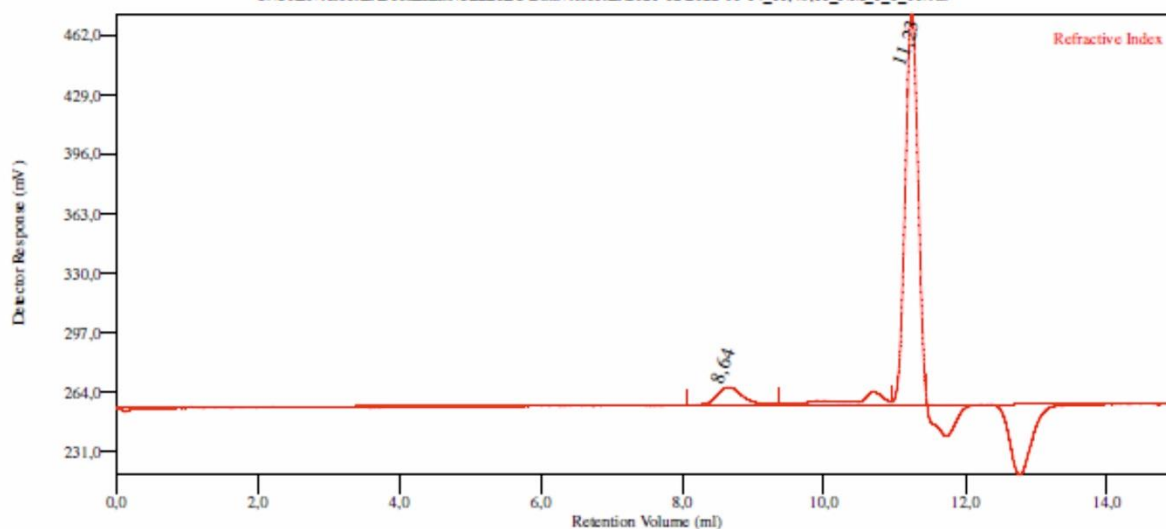

Conventional Calibration - Homopolymers : Results

|                         |        |         |
|-------------------------|--------|---------|
| Peak RV - (ml)          | 8,643  | 11,233  |
| Mn - (Daltons)          | 7 023  | 0       |
| Mw - (Daltons)          | 8 051  | 0       |
| Mz - (Daltons)          | 8 940  | 0       |
| Mp - (Daltons)          | 8 349  | 0       |
| Mw / Mn                 | 1,146  | 0,000   |
| Percent Above Mw:       | 0      | 100,000 |
| Percent Below Mw:       | 0      | 0,000   |
| Mw 10.0% Low            | 3 553  | 0       |
| Mw 10.0% High           | 13 319 | 0       |
| Wt Fr (Peak)            | 1,000  | 0,000   |
| RI Area - (mv ml)       | 4,27   | 45,35   |
| UV@240nm Area - (mv ml) | 0,00   | 0,00    |

|                          |                                             |
|--------------------------|---------------------------------------------|
| Annotation               |                                             |
| Method File              | CC_R1_PS_2021-09_z_dnia_2022-01-05-0003.vcm |
| Limits File              |                                             |
| Date Acquired            | Jan 14, 2022 - 11:45:11                     |
| Solvent                  | Chlorek metyleni                            |
| Acquisition Operator     | admin : Administrator                       |
| Calculation Operator     | admin : Administrator                       |
| Column Set               | Jordi DVB Mixed Bed                         |
| System                   | QDA MB                                      |
| Flow Rate - (ml/min)     | 1,000                                       |
| Ini Volume - (ul)        | 70,0                                        |
| Volume Increment - (ml)  | 0,00333                                     |
| Detector Temp. - (deg C) | 30,0                                        |
| Column Temp. - (deg C)   | 30,0                                        |
| OmniSEC Build Number     | 467                                         |

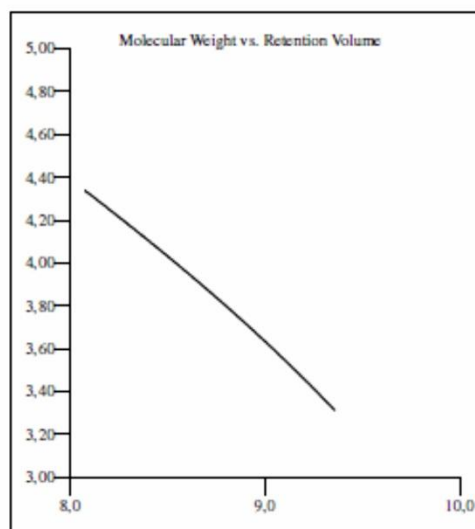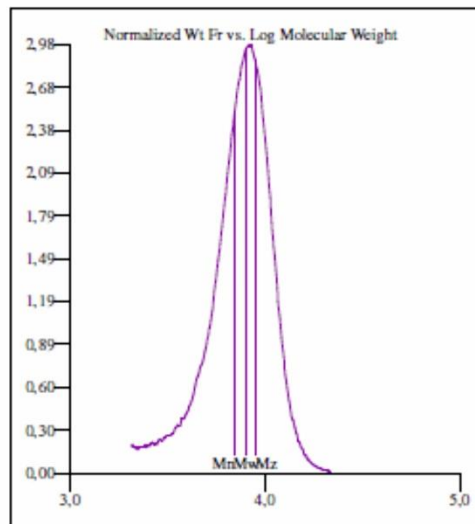

Figure S47. GPC eluogram of PLA obtained with **1** in toluene at 40°C, Table 1, entry 1.



FileName: ...-3.0\_DCTB\_K\_RP700-3500\_P28\_c50\0\_K22\1\1SRef\data\1\peaklist.xml  
 peak integrals - NM 3.0 (CHCl3)  
 DCTB+K RP 700-3500 Da P=28% c=50

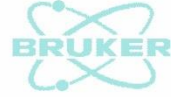

\* 1000

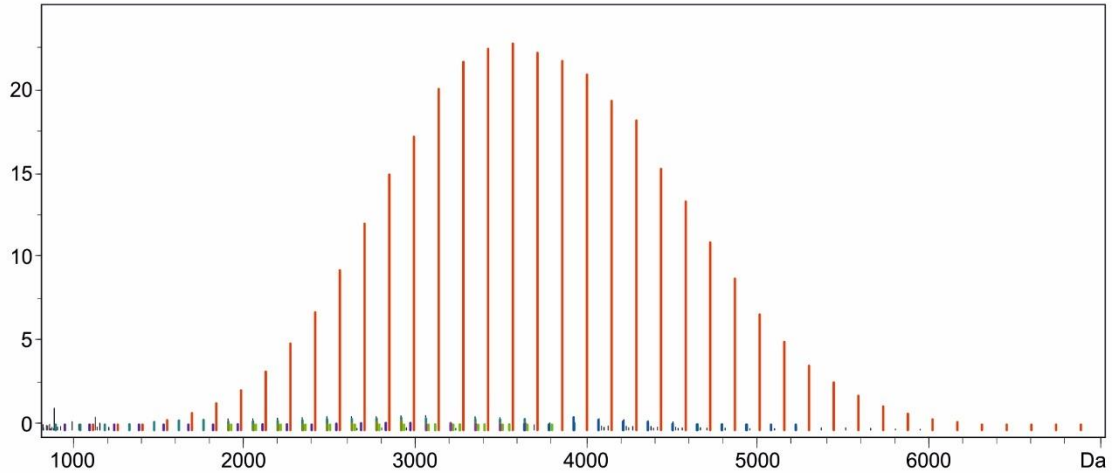

| n | ser. | rep.unit | resid.  | end1 | end2 | cation  | Mn      | Mw      | pd      | DP      | % I. | cnt |
|---|------|----------|---------|------|------|---------|---------|---------|---------|---------|------|-----|
| 1 | 1    | 144.050  | 76.0446 |      |      | 38.9637 | 3678.05 | 3866.73 | 1.05130 | 25.5331 | 86.3 | 43  |
| 2 | 2    | 144.050  | 55.6660 |      |      | 38.9637 | 2306.55 | 2524.42 | 1.09445 | 16.0121 | 1.3  | 20  |
| 3 | 3    | 144.050  | 55.9336 |      |      | 38.9637 | 3290.35 | 3298.05 | 1.00234 | 22.8417 | 0.2  | 4   |
| 4 | 4    | 144.050  | 1.25334 |      |      | 38.9637 | 2920.77 | 3281.72 | 1.12358 | 20.2761 | 4.1  | 30  |
| 5 | 5    | 144.050  | 3.53602 |      |      | 38.9637 | 2849.13 | 2923.13 | 1.02597 | 19.7787 | 0.9  | 13  |
| 6 | 6    | 144.050  | 3.99073 |      |      | 38.9637 | 3292.42 | 3303.86 | 1.00347 | 22.8561 | 0.3  | 5   |
| 7 | 7    | 144.050  | 17.9722 |      |      | 38.9637 | 2878.47 | 2980.12 | 1.03532 | 19.9824 | 0.5  | 14  |
| 8 | 8    | 144.050  | 142.470 |      |      | 38.9637 | 4222.53 | 4263.08 | 1.00961 | 29.3128 | 0.7  | 12  |

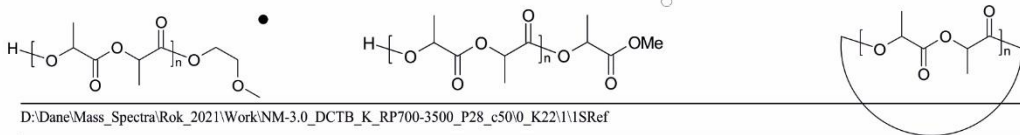

D:\Dane\Mass\_Spectra\Rok\_2021\Work\NM-3.0\_DCTB\_K\_RP700-3500\_P28\_c50\0\_K22\1\1SRef

Comment 1 NM 3.0 (CHCl3)  
 Comment 2 DCTB+K RP 700-3500 Da P=28% c=50

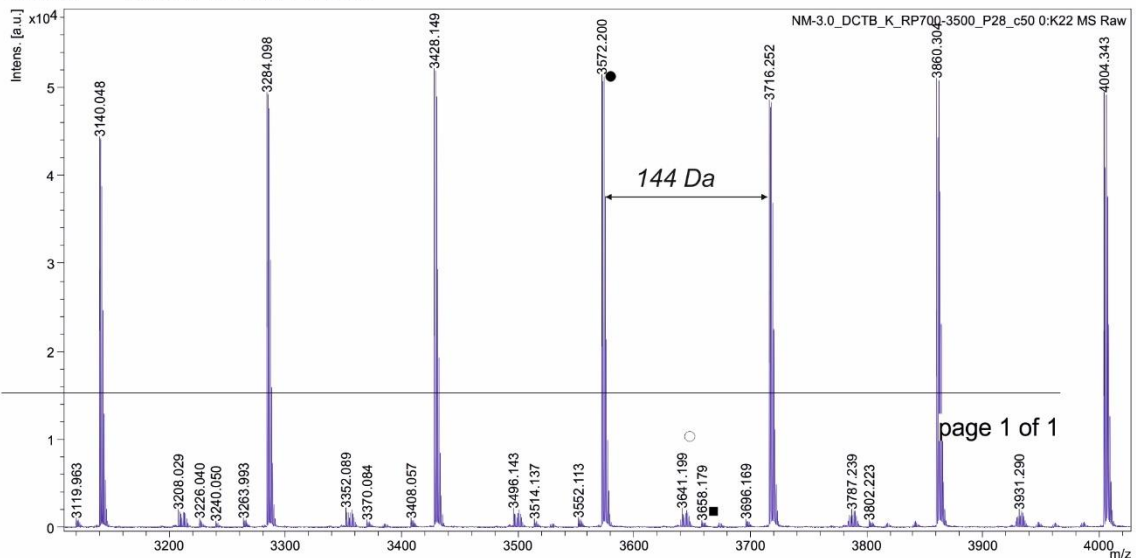

Bruker Daltonics flexAnalysis

printed: 12/23/2021 16:41:22

**Figure S48.** MALDI-TOF spectrum of PLA obtained with **1** in toluene at r.t., Table 1, entry

4. Figure 1 (—)



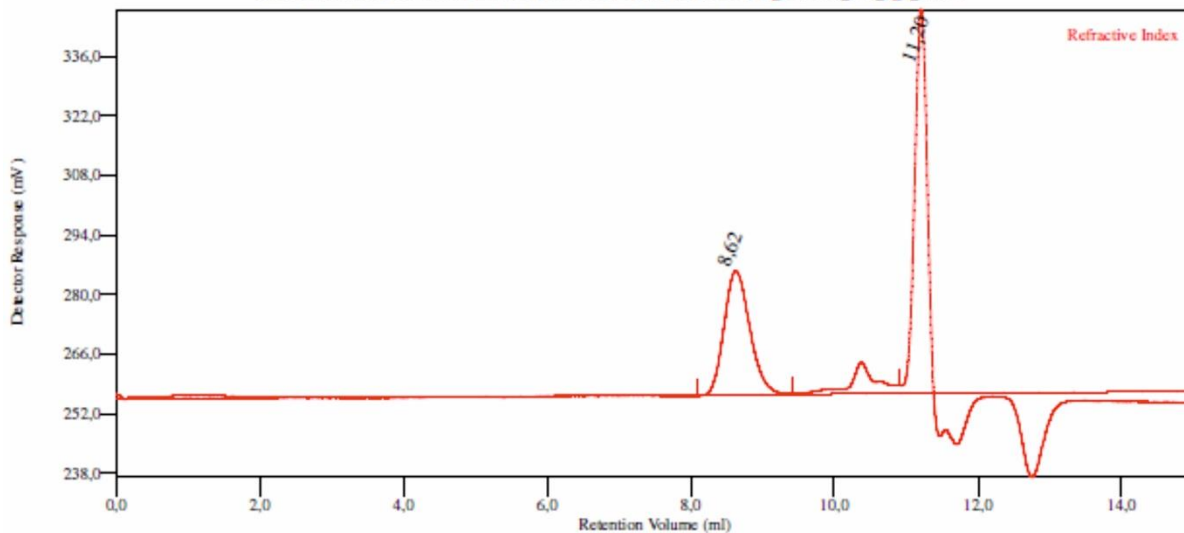

Conventional Calibration - Homopolymers : Results

|                         |        |         |
|-------------------------|--------|---------|
| Peak RV - (ml)          | 8,623  | 11,200  |
| Mn - (Daltons)          | 7 364  | 0       |
| Mw - (Daltons)          | 8 121  | 0       |
| Mz - (Daltons)          | 8 818  | 0       |
| Mp - (Daltons)          | 8 283  | 0       |
| Mw / Mn                 | 1,103  | 0,000   |
| Percent Above Mw:       | 0      | 100,000 |
| Percent Below Mw:       | 0      | 0,000   |
| Mw 10.0% Low            | 4 267  | 0       |
| Mw 10.0% High           | 12 388 | 0       |
| Wt Fr (Peak)            | 1,000  | 0,000   |
| RI Area - (mv ml)       | 12,02  | 17,71   |
| UV@240nm Area - (mv ml) | 0,00   | 0,00    |

| Annotation               |                                             |
|--------------------------|---------------------------------------------|
| Method File              | CC_RI_PS_2021-09_x_dnia_2022-01-05-0003.vcm |
| Limits File              |                                             |
| Date Acquired            | Jan 14, 2022 - 16:28:08                     |
| Solvent                  | Chlorek metyleno                            |
| Acquisition Operator     | admin : Administrator                       |
| Calculation Operator     | admin : Administrator                       |
| Column Set               | Jordi DVB Mixed Bed                         |
| System                   | QDA MB                                      |
| Flow Rate - (ml/min)     | 1,000                                       |
| Ini Volume - (ul)        | 30,0                                        |
| Volume Increment - (ml)  | 0,00333                                     |
| Detector Temp. - (deg C) | 30,0                                        |
| Column Temp. - (deg C)   | 30,0                                        |
| OmniSEC Build Number     | 467                                         |

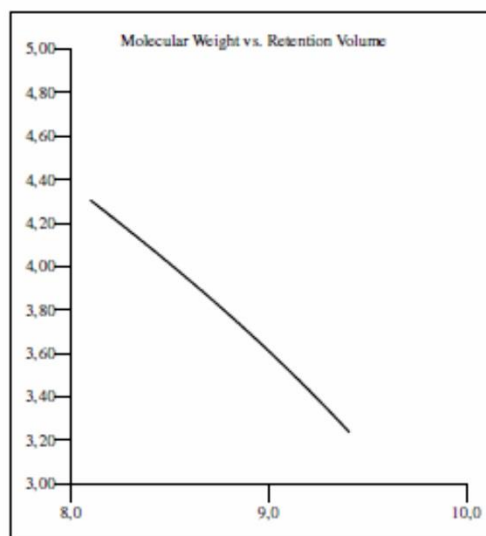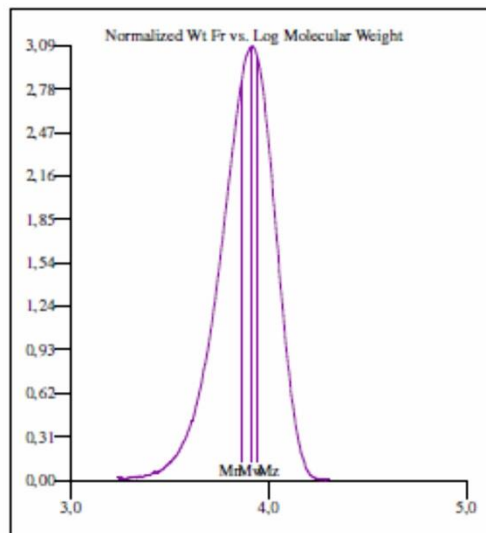

Figure S49. GPC eluogram of PLA obtained with **1** in toluene at r.t., Table 1, entry 4.

FileName: ...TB\_K\_RP700-3500\_P34\_c25\_defl0640\0\_B20\1\1SRef\pdata\1\peaklist.xml  
 peak integrals - DT-14,2 [CHCl3]  
 DCTB+K RP 700-3500 Da P=34% c=25 defl=640 Da

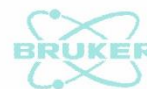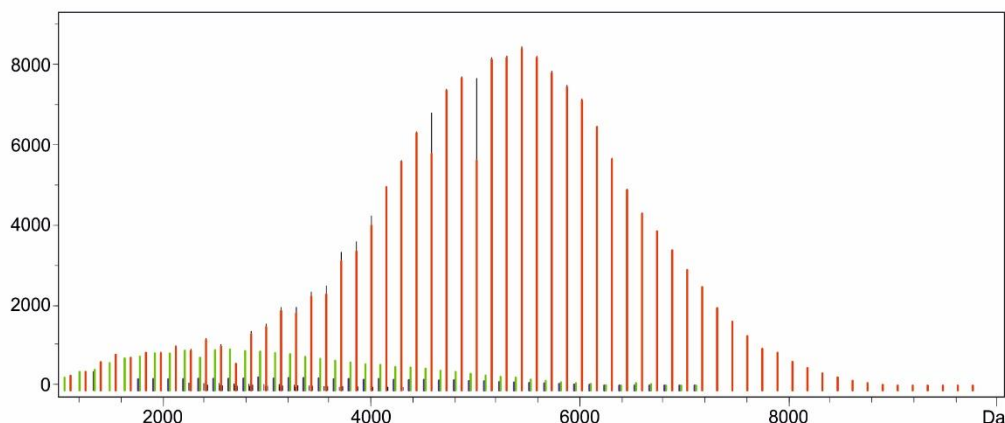

| n   | ser. | rep.unit | resid.  | end1 | end2 | cation  | Mn      | Mw      | pd      | DP      | % I. | cnt |
|-----|------|----------|---------|------|------|---------|---------|---------|---------|---------|------|-----|
| • 1 | 1    | 144.034  | 75.9145 |      |      | 38.9637 | 5136.56 | 5505.72 | 1.07187 | 35.6621 | 72.4 | 61  |
| ○ 2 | 2    | 144.034  | 3.33406 |      |      | 38.9637 | 3902.54 | 4405.28 | 1.12882 | 27.0945 | 3.4  | 38  |
| 3   | 3    | 144.034  | 18.0862 |      |      | 38.9637 | 3224.45 | 3786.04 | 1.17417 | 22.3867 | 9.2  | 43  |
| 4   | 4    | 63.1228  | 36.3855 |      |      | 38.9637 | 801.534 | 804.615 | 1.00384 | 12.6980 | 1.2  | 3   |
| 5   | 5    | 63.1228  | 56.3499 |      |      | 38.9637 | 779.269 | 785.009 | 1.00737 | 12.3453 | 1.1  | 4   |

\* May originate from hydrolysis of PLA during quenching with H<sub>2</sub>O/H<sup>+</sup>

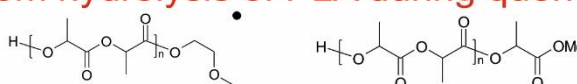

D:\Dane\Mass\_Spectra\Rok\_2023\Work\DT-14-2\_DCTB\_K\_RP700-3500\_P34\_c25\_defl0640\0\_B20\1\1SRef

Comment 1 DT-14,2 [CHCl<sub>3</sub>]  
 Comment 2 DCTB+K RP 700-3500 Da P=34% c=25 defl=640 Da

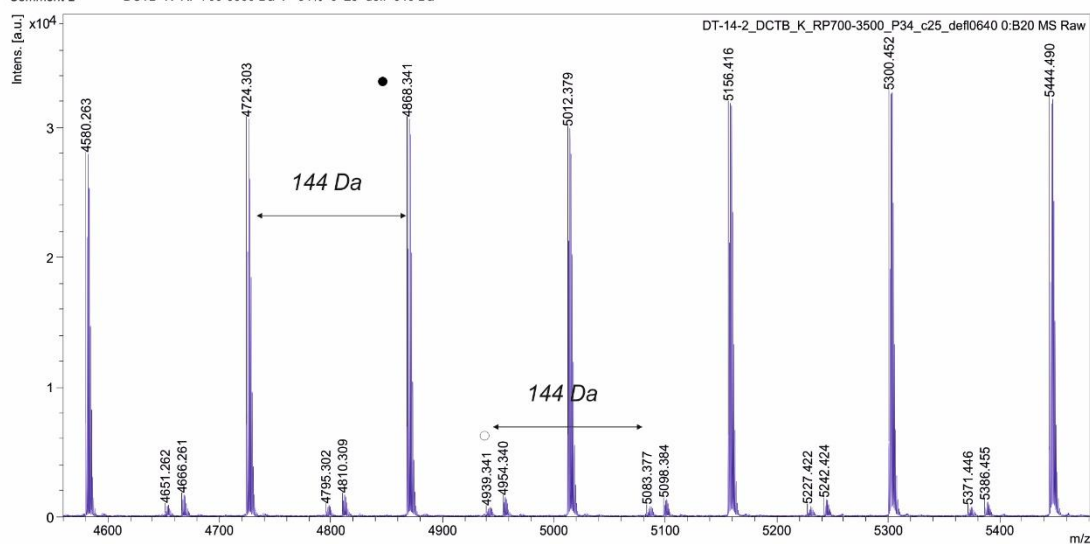

Bruker Daltonics flexAnalysis

printed: 8/1/2023 14:26:30

Figure S50. MALDI-TOF spectrum of PLA obtained with **1** in toluene at 0°C, Table 1, entry

7. Figure 1 (—)

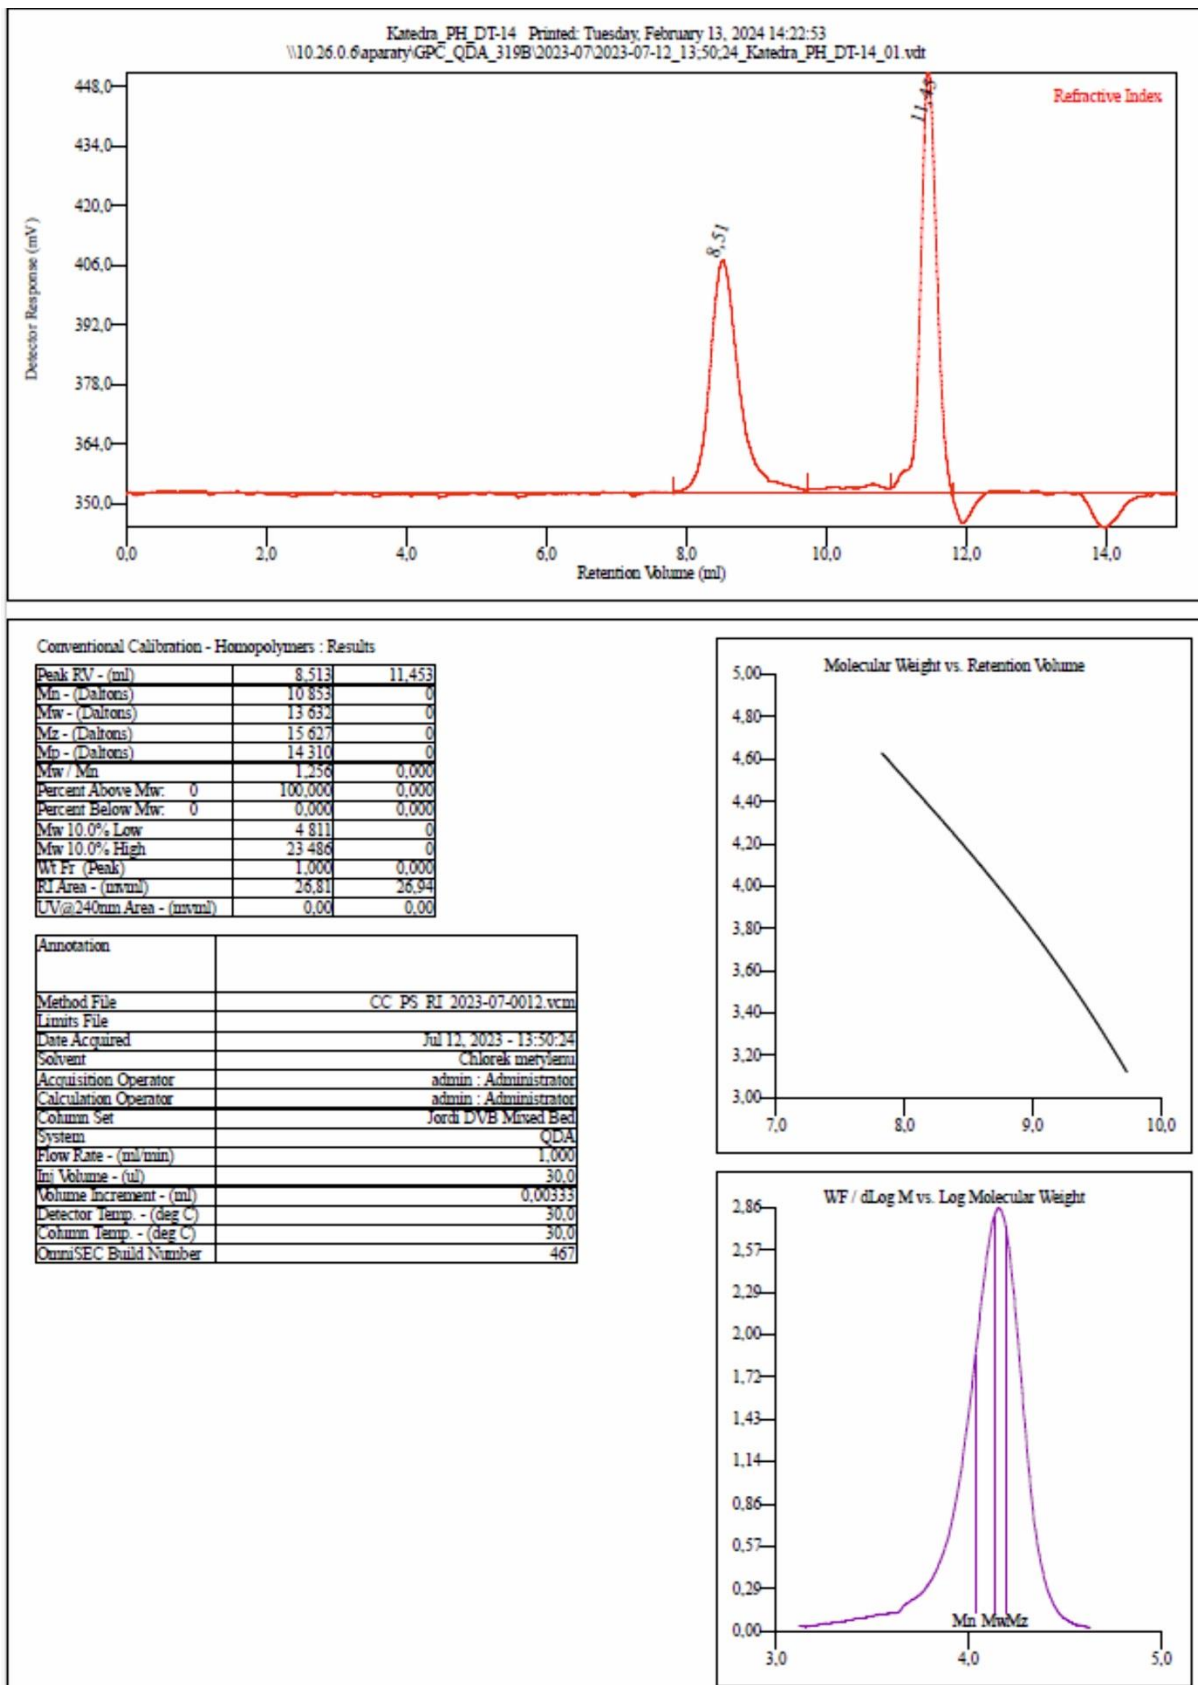

**Figure S51.** GPC eluogram of PLA obtained with **1** in toluene at 0°C, Table 1, entry 7.

FileName: ...M-12.1\_DCTB\_K\_RP700-3500\_P38\_c5\0\_J5\1\1SRef\pdata\1\peaklist.xml  
 peak integrals - NM 12.1 (CHCl3)  
 DCTB+K RP 700-3500 Da P=38% c=5

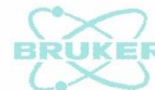

\* 1000

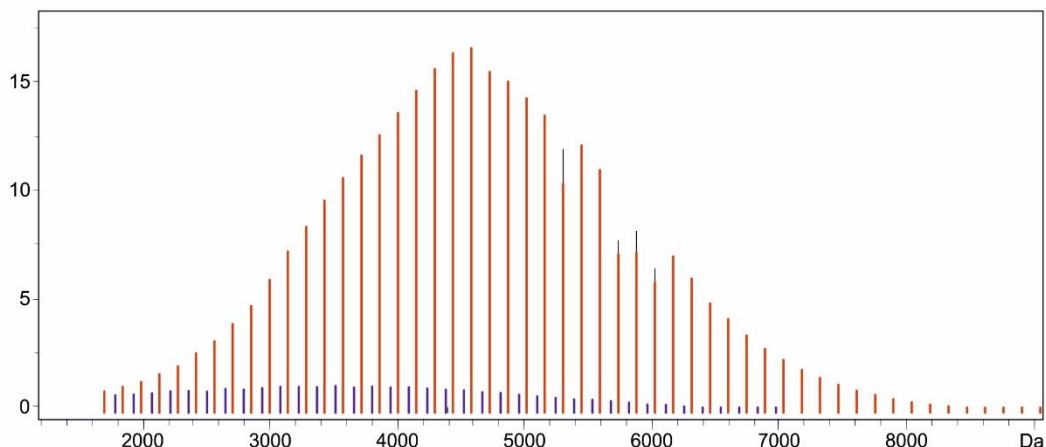

| n | ser. | rep.unit | resid.  | end1 | end2 | cation  | Mn      | Mw      | pd      | DP      | % I. | cnt |
|---|------|----------|---------|------|------|---------|---------|---------|---------|---------|------|-----|
| 1 | 1    | 144.052  | 76.5592 |      |      | 38.9637 | 4628.13 | 4944.80 | 1.06842 | 32.1283 | 81.1 | 54  |
| 2 | 2    | 144.052  | 18.4689 |      |      | 38.9637 | 3775.57 | 4181.42 | 1.10749 | 26.2098 | 7.2  | 37  |

May originate from hydrolysis of PLA during quenching with H<sub>2</sub>O/H<sup>+</sup>

D:\Dane\Mass\_Spectra\Rok\_2021\Work\NM-12.1\_DCTB\_K\_RP700-3500\_P38\_c5\0\_J5\1\1SRef

Comment 1 NM 12.1 (CHCl<sub>3</sub>)  
 Comment 2 DCTB+K RP 700-3500 Da P=38% c=5

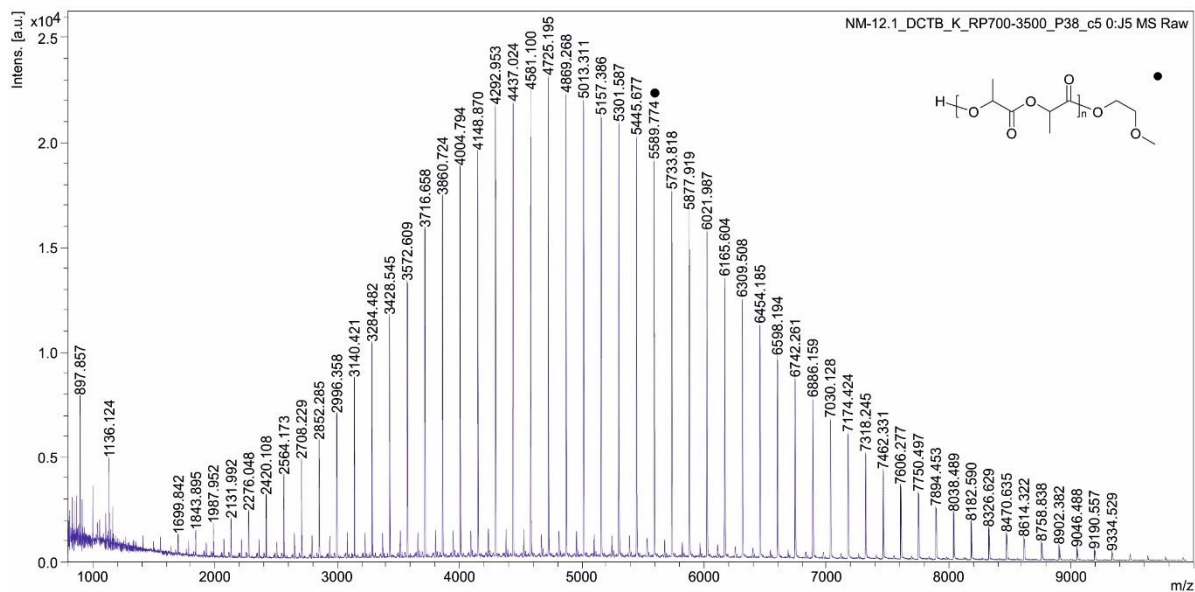

Bruker Daltonics flexAnalysis

printed: 12/23/2021 16:52:27

Figure S52. MALDI-TOF spectrum of PLA obtained with **1** in toluene at  $-20^{\circ}\text{C}$ , Table 1, entry 9. Figure 1 (→)

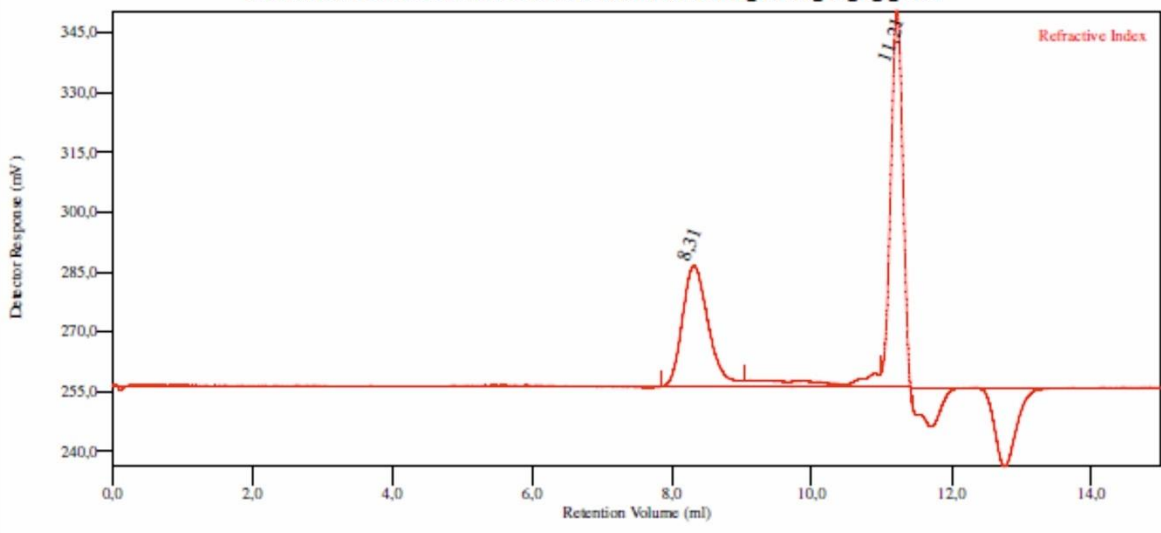

Conventional Calibration - Homopolymers : Results

|                        |        |         |
|------------------------|--------|---------|
| Peak RV - (ml)         | 8.310  | 11.207  |
| Mn - (Daltons)         | 12 347 | 0       |
| Mw - (Daltons)         | 13 774 | 0       |
| Mz - (Daltons)         | 15 003 | 0       |
| Mp - (Daltons)         | 14 331 | 0       |
| Mw / Mn                | 1,116  | 0,000   |
| Percent Above Mw:      | 0      | 100,000 |
| Percent Below Mw:      | 0      | 0,000   |
| Mw 10.0% Low           | 6 744  | 0       |
| Mw 10.0% High          | 21 261 | 0       |
| Wt Fr (Peak)           | 1,000  | 0,000   |
| RI Area - (mVml)       | 13,14  | 18,52   |
| UV@240nm Area - (mVml) | 0,00   | 0,00    |

|                          |                                             |
|--------------------------|---------------------------------------------|
| Annotation               |                                             |
| Method File              | CC_RI_PS_2021-09_x_dnia_2022-01-05-0003.vcm |
| Limits File              |                                             |
| Date Acquired            | Jan 14, 2022 - 13:14:30                     |
| Solvent                  | Chlorek metyleno                            |
| Acquisition Operator     | admin : Administrator                       |
| Calculation Operator     | admin : Administrator                       |
| Column Set               | Jordi DVB Mixed Bed                         |
| System                   | QDA MB                                      |
| Flow Rate - (ml/min)     | 1,000                                       |
| Ini Volume - (ul)        | 30,0                                        |
| Volume Increment - (ml)  | 0,00333                                     |
| Detector Temp. - (deg C) | 30,0                                        |
| Column Temp. - (deg C)   | 30,0                                        |
| OmniSEC Build Number     | 467                                         |

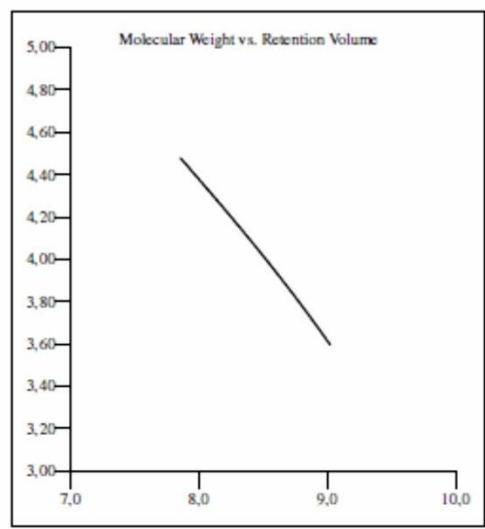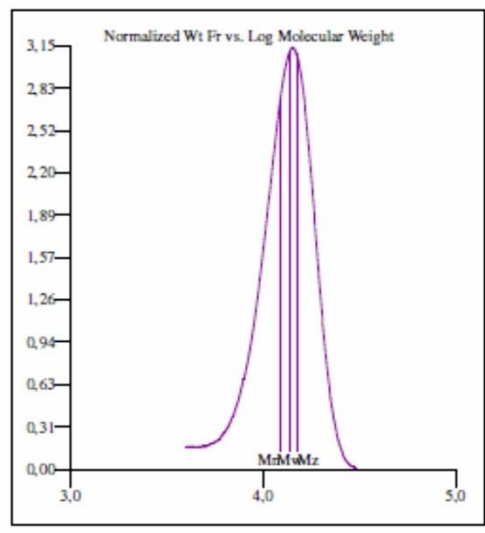

Figure S53. GPC eluogram of PLA obtained with **1** in toluene at  $-40^{\circ}\text{C}$ , Table 1, entry 9.



FileName: ...-10.1\_DCTB\_K\_RP700-3500\_P34\_c50\0\_K24\1\1SRef\data\1\peaklist.xml  
 peak integrals - NM 10.1 (CHCl3)  
 DCTB+K RP 700-3500 Da P=34% c=50

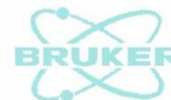

\* 1000

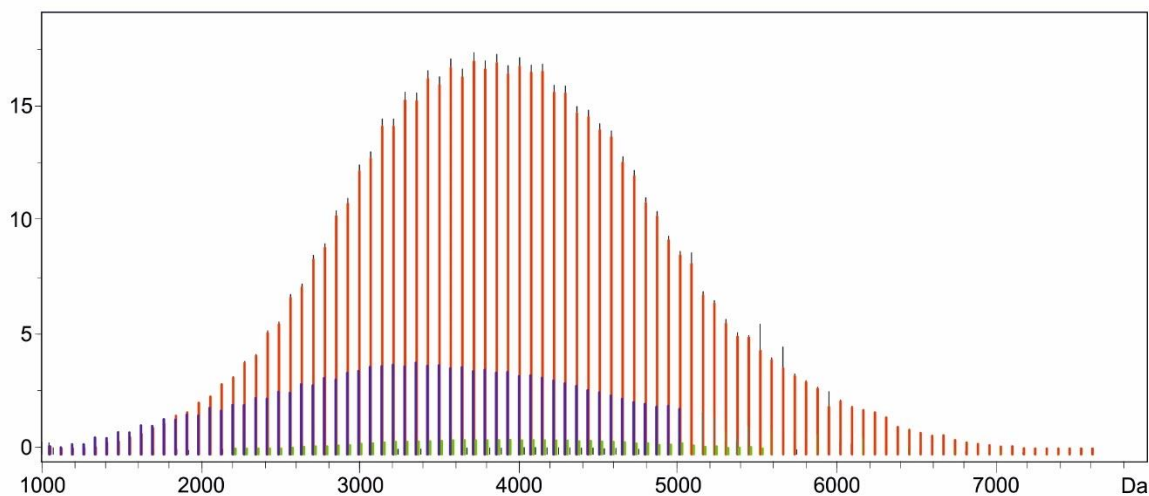

| n | ser. | rep.unit | resid.   | end1 | end2 | cation  | Mn      | Mw      | pd      | DP      | % I. | cnt |
|---|------|----------|----------|------|------|---------|---------|---------|---------|---------|------|-----|
| 1 | 1    | 72.0270  | 3.84128  |      |      | 38.9637 | 3918.61 | 4181.67 | 1.06713 | 54.4047 | 74.7 | 96  |
| 2 | 2    | 72.0270  | -0.08261 |      |      | 38.9637 | 3295.57 | 3560.56 | 1.08041 | 45.7547 | 17.3 | 56  |
| 3 | 3    | 72.0270  | 17.8350  |      |      | 38.9637 | 3903.32 | 4089.18 | 1.04762 | 54.1924 | 2    | 47  |
| 4 | 4    | 71.9513  | 5.24635  |      |      | 38.9637 | 5228.53 | 5230.82 | 1.00044 | 72.6676 | 0.7  | 5   |
| 5 | 5    | 288.013  | 74.1501  |      |      | 38.9637 | 5679.03 | 5714.83 | 1.00630 | 19.7180 | 0.4  | 7   |

Traces

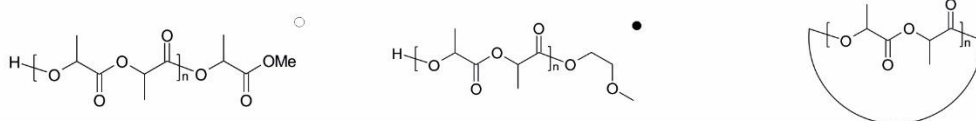

D:\Dane\Mass\_Spectra\Rok\_2021\Work\NM-10.1\_DCTB\_K\_RP700-3500\_P34\_c50\_0\_K24\1\1SRef

Comment 1 NM 10.1 (CHCl3)  
 Comment 2 DCTB+K RP 700-3500 Da P=34% c=50

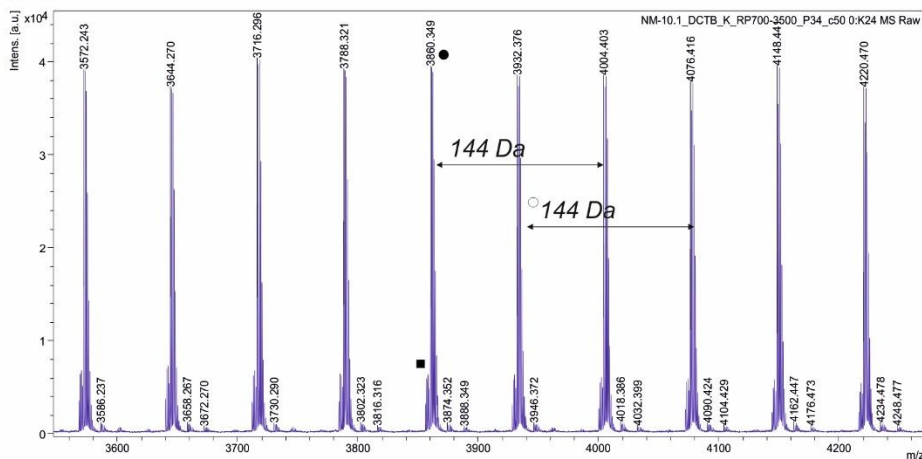

Bruker Daltonics flexAnalysis

printed: 12/23/2021 16:53:19

**Figure S54.** MALDI-TOF spectrum of PLA obtained with **1** in CH<sub>2</sub>Cl<sub>2</sub> at 40°C, Table 1, entry 2. Figure 1 (—)

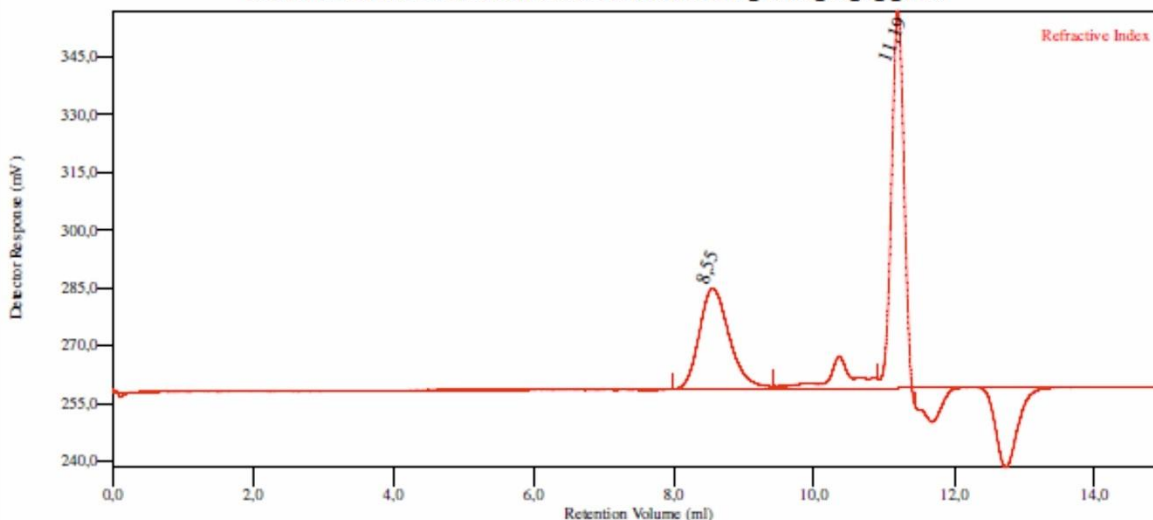

Conventional Calibration - Homopolymers : Results

|                         |        |         |
|-------------------------|--------|---------|
| Peak RV - (ml)          | 8,550  | 11,187  |
| Mn - (Daltons)          | 7 687  | 0       |
| Mw - (Daltons)          | 8 987  | 0       |
| Mz - (Daltons)          | 10 122 | 0       |
| Mp - (Daltons)          | 9 264  | 0       |
| Mw / Mn                 | 1,169  | 0,000   |
| Percent Above Mw:       | 0      | 100,000 |
| Percent Below Mw:       | 0      | 0,000   |
| Mw 10.0% Low            | 3 863  | 0       |
| Mw 10.0% High           | 15 034 | 0       |
| Wt Fr (Peak)            | 1,000  | 0,000   |
| RI Area - (mv ml)       | 13,00  | 19,64   |
| UV@240nm Area - (mv ml) | 0,00   | 0,00    |

| Annotation               |                                             |
|--------------------------|---------------------------------------------|
| Method File              | CC_RI_PS_2021-09_x_dnia_2022-01-05-0003.vcm |
| Limits File              |                                             |
| Date Acquired            | Jan 14, 2022 - 12:01:02                     |
| Solvent                  | Chlorek metyleno                            |
| Acquisition Operator     | admin : Administrator                       |
| Calculation Operator     | admin : Administrator                       |
| Column Set               | Jordi DVB Mixed Bed                         |
| System                   | QDA MB                                      |
| Flow Rate - (ml/min)     | 1,000                                       |
| Ini Volume - (ul)        | 30,0                                        |
| Volume Increment - (ml)  | 0,00333                                     |
| Detector Temp. - (deg C) | 30,0                                        |
| Column Temp. - (deg C)   | 30,0                                        |
| OmniSEC Build Number     | 467                                         |

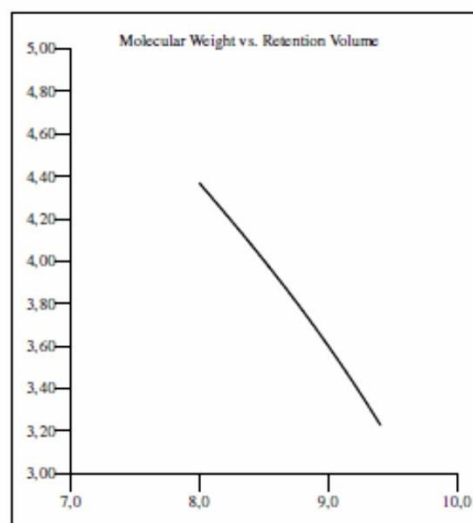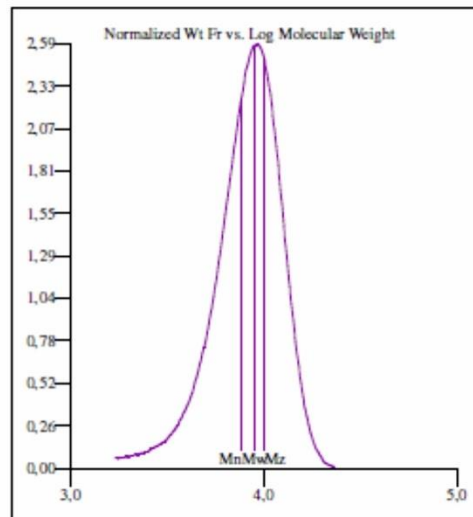

Figure S55. GPC eluogram of PLA obtained with **1** in CH<sub>2</sub>Cl<sub>2</sub> at 40°C, Table 1, entry 2.

FileName: ...B\_K\_RP700-3500\_P36\_c05\_defl0640\0\_C22\1\1SRef\pdata\1\peaklist.xml  
 peak integrals - Ph-227,2 [CHCl3]  
 DCTB+K RP 700-3500 Da P=36% c=05 defl=640 Da

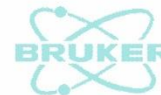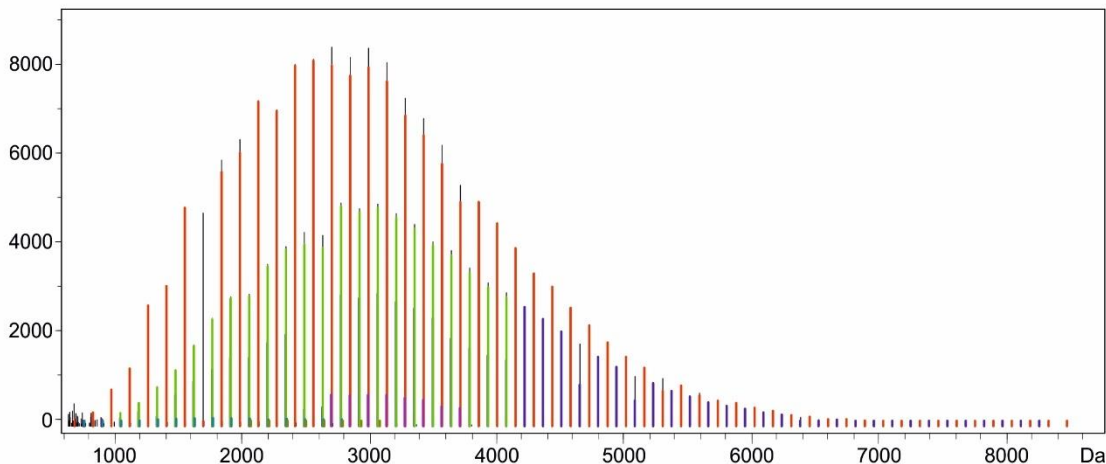

| n | ser. | rep.unit | resid.  | end1 | end2 | cation  | Mn      | Mw      | pd      | DP      | % I. | cnt |
|---|------|----------|---------|------|------|---------|---------|---------|---------|---------|------|-----|
| 1 | 1    | 144.040  | 75.8543 |      |      | 38.9637 | 3042.05 | 3437.74 | 1.13008 | 21.1195 | 56.9 | 55  |
| 2 | 2    | 144.040  | 1.88145 |      |      | 38.9637 | 4302.54 | 4683.92 | 1.08864 | 29.8705 | 9.2  | 53  |
| 3 | 3    | 144.040  | 4.00462 |      |      | 38.9637 | 2848.86 | 3052.55 | 1.07150 | 19.7783 | 23.9 | 22  |
| 4 | 4    | 144.040  | 10.1610 |      |      | 38.9637 | 1744.66 | 1926.36 | 1.10415 | 12.1124 | 0.7  | 15  |
| 5 | 5    | 144.040  | 18.1885 |      |      | 38.9637 | 2436.95 | 2580.21 | 1.01705 | 17.6128 | 0.1  | 8   |
| 6 | 6    | 144.040  | 71.3466 |      |      | 38.9637 | 3213.81 | 3248.70 | 1.01086 | 22.3120 | 0.8  | 8   |

Traces

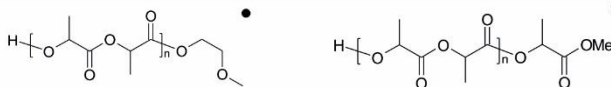

D:\Dane\Mass\_Spectra\Rok\_2023\Work\Ph-227-2\_DCTB\_K\_RP700-3500\_P36\_c05\_defl0640\0\_C22\1\1SRef

Comment 1 Ph-227,2 [CHCl3]  
 Comment 2 DCTB+K RP 700-3500 Da P=36% c=05 defl=640 Da

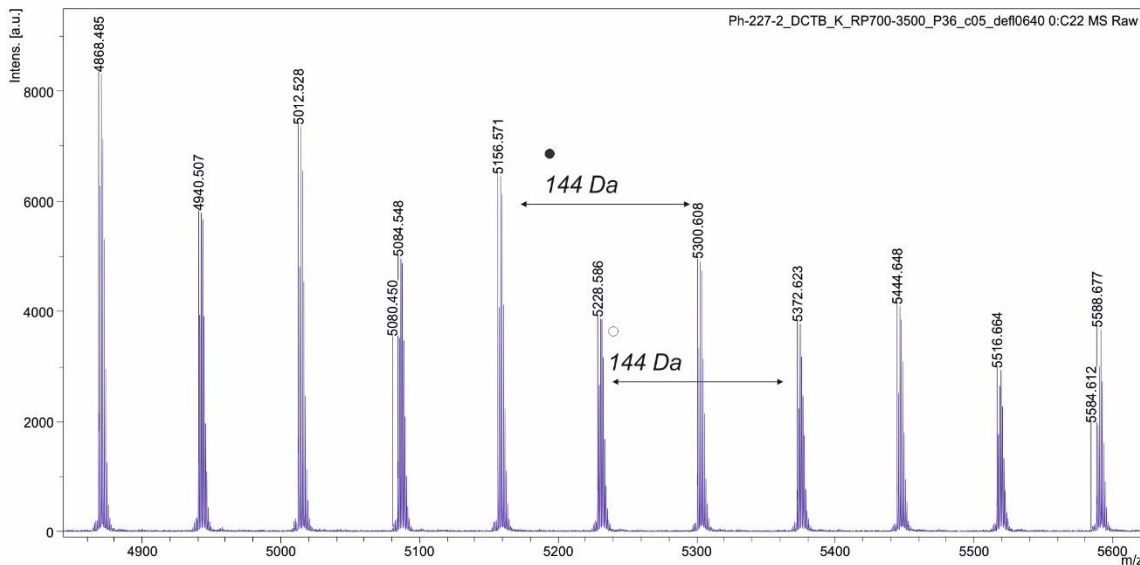

Bruker Daltonics flexAnalysis

printed: 8/1/2023 14:37:57

Figure S56. MALDI-TOF spectrum of PLA obtained with 1 in CH<sub>2</sub>Cl<sub>2</sub> at 0°C, Table 1, entry

8. Figure 1 (—)



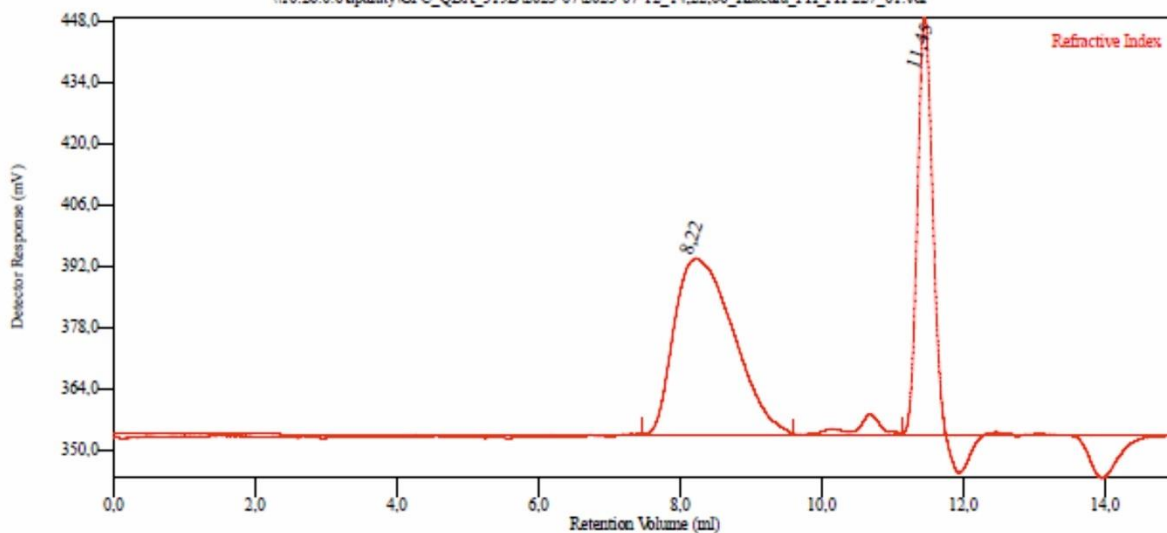

Conventional Calibration - Homopolymers : Results

|                        |         |        |
|------------------------|---------|--------|
| Peak RV - (ml)         | 8.220   | 11.447 |
| Mn - (Daltons)         | 13 732  | 0      |
| Mw - (Daltons)         | 20 136  | 0      |
| Mz - (Daltons)         | 26 165  | 0      |
| Mp - (Daltons)         | 22 661  | 0      |
| Mw / Mn                | 1.466   | 0.000  |
| Percent Above Mw:      | 100.000 | 0.000  |
| Percent Below Mw:      | 0.000   | 0.000  |
| Mw 10.0% Low           | 5 219   | 0      |
| Mw 10.0% High          | 42 277  | 0      |
| WI Fr (Peak)           | 1.000   | 0.000  |
| RI Area - (mVml)       | 39.23   | 23.60  |
| UV@240nm Area - (mVml) | 0.00    | 0.00   |

| Annotation               |                           |
|--------------------------|---------------------------|
| Method File              | CC PS RI 2023-07-0012.vcm |
| Limits File              |                           |
| Date Acquired            | Jul 12, 2023 - 14:22:06   |
| Solvent                  | Chlorek metylowy          |
| Acquisition Operator     | admin : Administrator     |
| Calculation Operator     | admin : Administrator     |
| Column Set               | Jordi DVB Mixed Bed       |
| System                   | QDA                       |
| Flow Rate - (ml/min)     | 1.000                     |
| Inj Volume - (ul)        | 30.0                      |
| Volume Increment - (ml)  | 0.00333                   |
| Detector Temp. - (deg C) | 30.0                      |
| Column Temp. - (deg C)   | 30.0                      |
| OmniSEC Build Number     | 467                       |

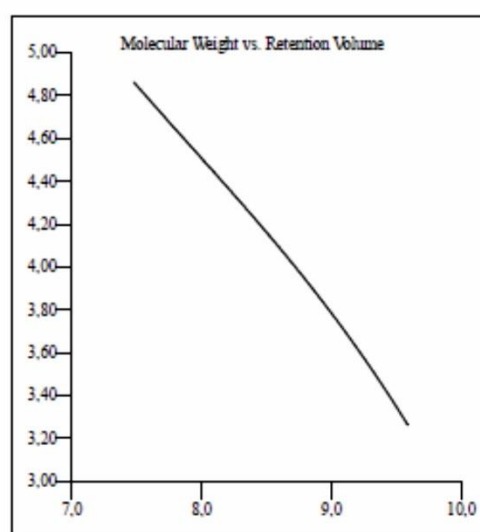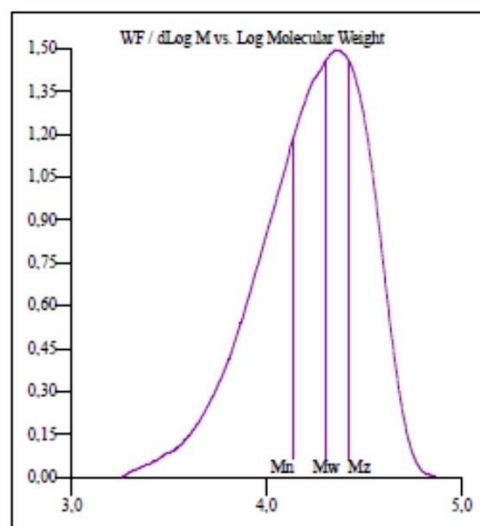

Figure S57. GPC eluogram of PLA obtained with **1** in CH<sub>2</sub>Cl<sub>2</sub> at 0°C, Table 1, entry 8.

FileName: ...-15.1\_DCTB\_K\_RP700-3500\_P36\_c50\0\_J12\1\1SRef\data\1\peaklist.xml  
 peak integrals - NM 15.1 (CHCl3)  
 DCTB+K RP 700-3500 Da P=36% c=50

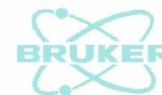

\* 1000

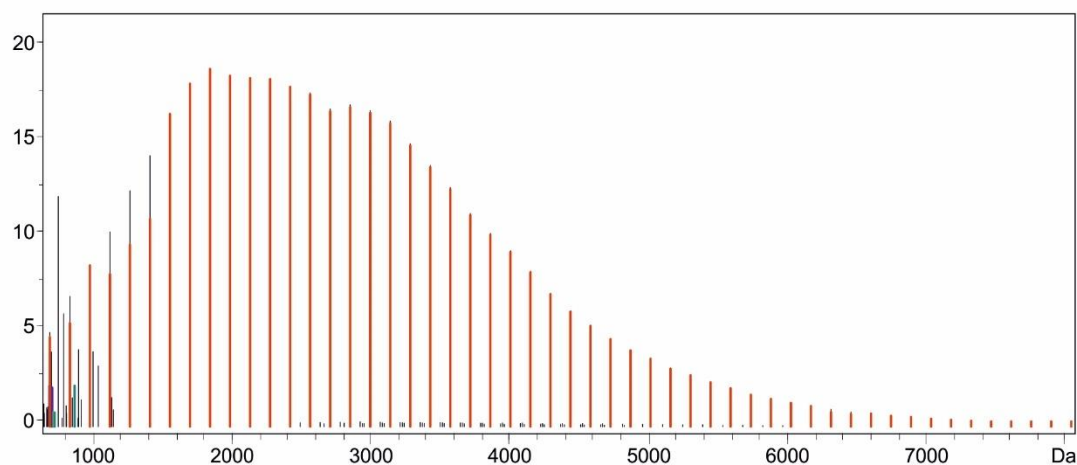

| n   | ser. | rep.unit | resid.  | end1 | end2 | cation  | Mn      | Mw      | pd      | DP      | % I. | cnt |
|-----|------|----------|---------|------|------|---------|---------|---------|---------|---------|------|-----|
| • 1 | 1    | 144.053  | 75.7055 |      |      | 38.9637 | 2691.13 | 3350.40 | 1.24498 | 18.6816 | 67.6 | 65  |
| 2   | 2    | 144.053  | 92.2274 |      |      | 38.9637 | 523.592 | 546.025 | 1.04284 | 3.63473 | 2.1  | 3   |
| 3   | 3    | 144.053  | 101.951 |      |      | 38.9637 | 523.851 | 551.719 | 1.05320 | 3.63653 | 0.3  | 3   |
| 4   | 4    | 144.053  | 109.573 |      |      | 38.9637 | 661.046 | 700.150 | 1.05915 | 4.58893 | 0.8  | 4   |

Traces

D:\Dane\Mass\_Spectra\Rok\_2021\Work\NM-15.1\_DCTB\_K\_RP700-3500\_P36\_c50\0\_J12\1\1SRef

Comment 1 NM 15.1 (CHCl3)  
 Comment 2 DCTB+K RP 700-3500 Da P=36% c=50

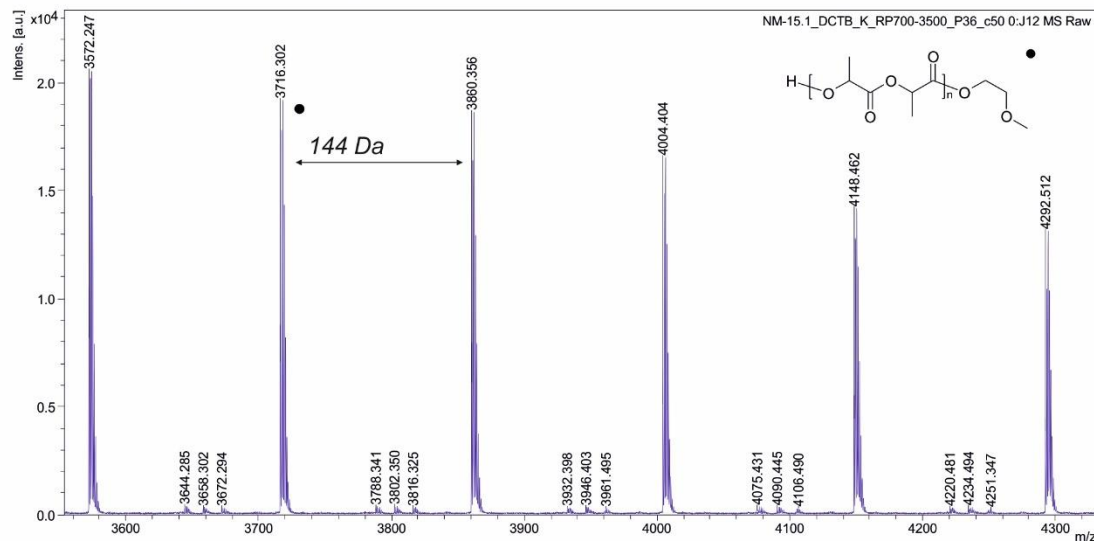

Bruker Daltonics flexAnalysis

printed: 12/23/2021 17:15:33

page 1 of 1

**Figure S58.** MALDI-TOF spectrum of PLA obtained with **1** in CH<sub>2</sub>Cl<sub>2</sub> at -40°C, Table 1, entry 14. Figure 1 (—)

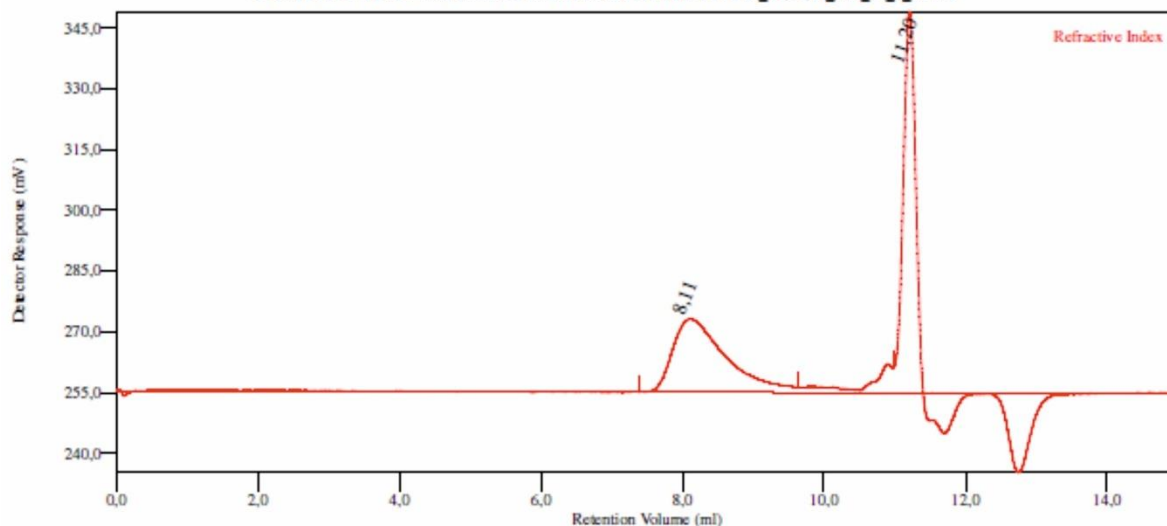

Conventional Calibration - Homopolymers : Results

|                         |        |         |
|-------------------------|--------|---------|
| Peak RV - (ml)          | 8,107  | 11,197  |
| Mn - (Daltons)          | 9 113  | 0       |
| Mw - (Daltons)          | 16 069 | 0       |
| Mz - (Daltons)          | 21 203 | 0       |
| Mp - (Daltons)          | 19 817 | 0       |
| Mw / Mn                 | 1,763  | 0,000   |
| Percent Above Mw:       | 0      | 100,000 |
| Percent Below Mw:       | 0      | 0,000   |
| Mw 10.0% Low            | 2 739  | 0       |
| Mw 10.0% High           | 33 368 | 0       |
| Wt Fr (Peak)            | 1,000  | 0,000   |
| RI Area - (mv ml)       | 15,80  | 18,82   |
| UV@240nm Area - (mv ml) | 0,00   | 0,00    |

|                          |                                             |
|--------------------------|---------------------------------------------|
| Annotation               |                                             |
| Method File              | CC_RI_PS_2021-09_z_dnia_2022-01-05-0003.vcm |
| Limits File              |                                             |
| Date Acquired            | Jan 14, 2022 - 13:46:10                     |
| Solvent                  | Chlorek metyleno                            |
| Acquisition Operator     | admin : Administrator                       |
| Calculation Operator     | admin : Administrator                       |
| Column Set               | Jordi DVB Mixed Bed                         |
| System                   | QDA MB                                      |
| Flow Rate - (ml/min)     | 1,000                                       |
| Ini Volume - (ul)        | 30,0                                        |
| Volume Increment - (ml)  | 0,00333                                     |
| Detector Temp. - (deg C) | 30,0                                        |
| Column Temp. - (deg C)   | 30,0                                        |
| OmniSEC Build Number     | 467                                         |

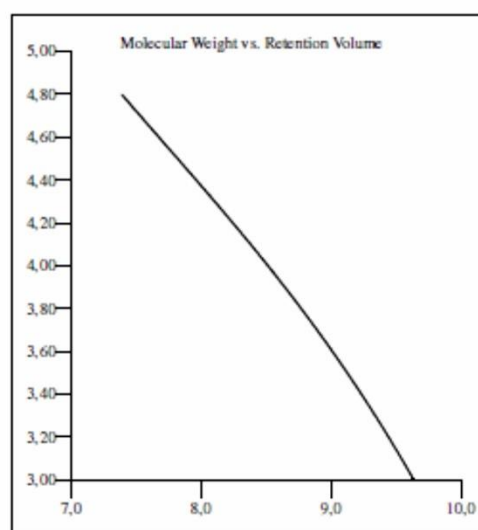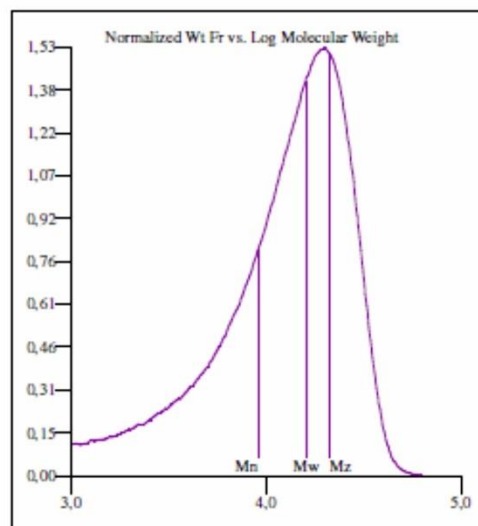

Figure S59. GPC eluogram of PLA obtained with **1** in CH<sub>2</sub>Cl<sub>2</sub> at -40°C, Table 1, entry 14.

FileName: ...M-13.1\_DCTB\_K\_RP700-3500\_P36\_c50\0\_J9\1\1SRef\pdata\1\peaklist.xml  
 peak integrals - NM 13.1 (CHCl3)  
 DCTB+K RP 700-3500 Da P=36% c=50

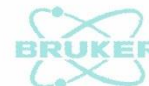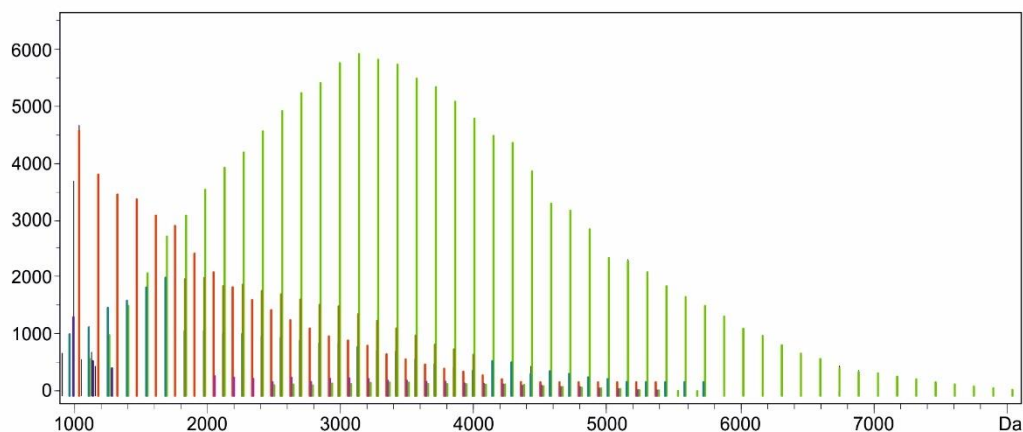

| n | ser. | rep.unit | resid.  | end1 | end2 | cation  | Mn      | Mw      | pd      | DP      | % I. | cnt |
|---|------|----------|---------|------|------|---------|---------|---------|---------|---------|------|-----|
| 1 | 1    | 144.053  | 138.256 |      |      | 38.9637 | 1451.50 | 2128.77 | 1.46660 | 10.0761 | 16.2 | 35  |
| 2 | 2    | 144.053  | 96.9609 |      |      | 38.9637 | 637.907 | 717.109 | 1.12416 | 4.42827 | 2.4  | 7   |
| 3 | 3    | 144.053  | 76.0381 |      |      | 38.9637 | 3578.97 | 4075.26 | 1.13867 | 24.8447 | 31.5 | 53  |
| 4 | 4    | 144.053  | 65.9703 |      |      | 38.9637 | 1612.52 | 2835.01 | 1.75812 | 11.1939 | 8.2  | 37  |
| 5 | 5    | 144.053  | 68.2011 |      |      | 38.9637 | 2684.10 | 2828.29 | 1.05372 | 18.6327 | 5.7  | 16  |
| 6 | 6    | 144.053  | 3.47028 |      |      | 38.9637 | 3462.00 | 3702.98 | 1.06961 | 24.0328 | 1.1  | 24  |
| 7 | 7    | 144.053  | 18.0356 |      |      | 38.9637 | 3829.85 | 4026.20 | 1.05127 | 26.5863 | 0.9  | 23  |

D:\Dane\Mass\_Spectra\Rok\_2021\Work\NM-13.1\_DCTB\_K\_RP700-3500\_P36\_c50\0\_J9\1\1SRef

Comment 1 NM 13.1 (CHCl3)

Comment 2 DCTB+K RP 700-3500 Da P=36% c=50

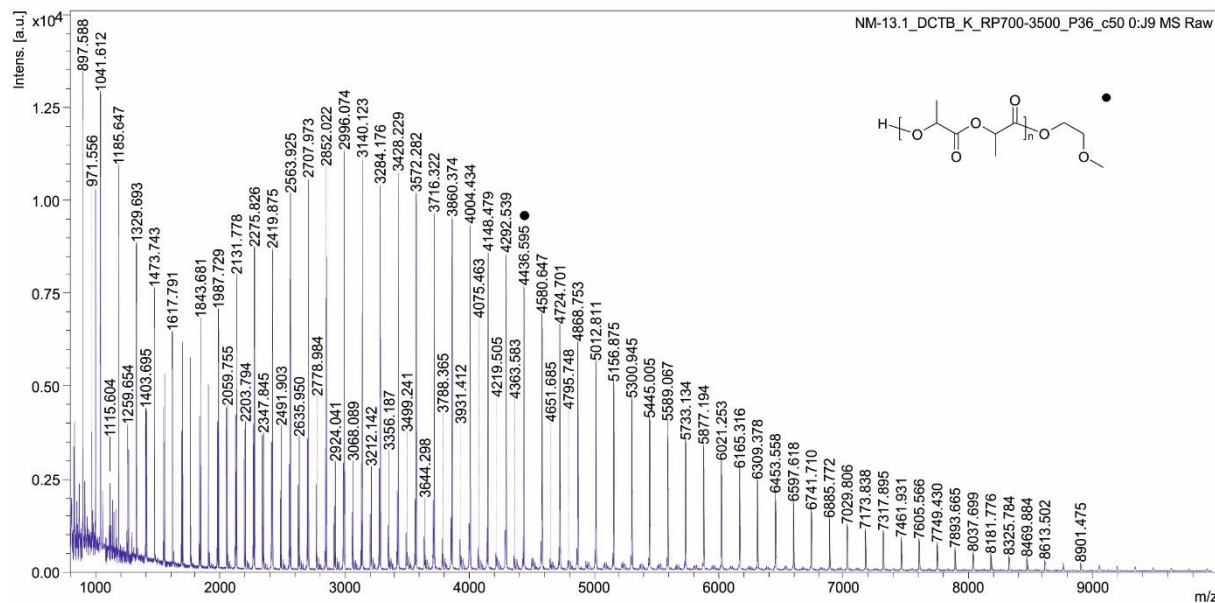

Bruker Daltonics flexAnalysis

printed: 12/23/2021 17:03:05

**Figure S60.** MALDI-TOF spectrum of PLA obtained with **1** in THF at  $-20^{\circ}\text{C}$ , Table 1, entry 12. Figure 1 (—)

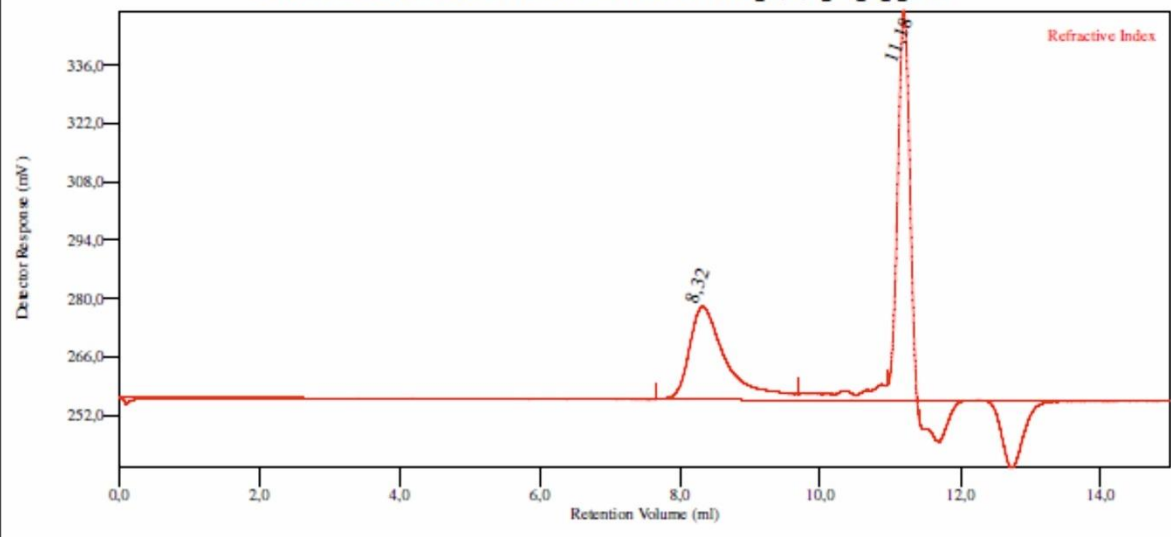

Conventional Calibration - Homopolymers : Results

|                         |         |        |
|-------------------------|---------|--------|
| Peak RV - (ml)          | 8,320   | 11,183 |
| Mn - (Daltons)          | 7,378   | 0      |
| Mw - (Daltons)          | 11,609  | 0      |
| Mz - (Daltons)          | 14,233  | 0      |
| Mp - (Daltons)          | 13,682  | 0      |
| Mw / Mn                 | 1,573   | 0,000  |
| Percent Above Mw:       | 100,000 | 0,000  |
| Percent Below Mw:       | 0,000   | 0,000  |
| Mw 10.0% Low            | 2,291   | 0      |
| Mw 10.0% High           | 21,410  | 0      |
| Wt Fr (Peak)            | 1,000   | 0,000  |
| RI Area - (mv ml)       | 13,58   | 18,39  |
| UV@240nm Area - (mv ml) | 0,00    | 0,00   |

| Annotation               |                                             |
|--------------------------|---------------------------------------------|
| Method File              | CC_RI_PS_2021-09_z_dnia_2022-01-05-0003.vcm |
| Limits File              |                                             |
| Date Acquired            | Jan 14, 2022 - 13:30:20                     |
| Solvent                  | Chlork metyleno                             |
| Acquisition Operator     | admin : Administrator                       |
| Calculation Operator     | admin : Administrator                       |
| Column Set               | Jordi DVB Mixed Bed                         |
| System                   | QDA MB                                      |
| Flow Rate - (ml/min)     | 1,000                                       |
| Inj Volume - (ul)        | 30,0                                        |
| Volume Increment - (ml)  | 0,00333                                     |
| Detector Temp. - (deg C) | 30,0                                        |
| Column Temp. - (deg C)   | 30,0                                        |
| OmniSEC Build Number     | 467                                         |

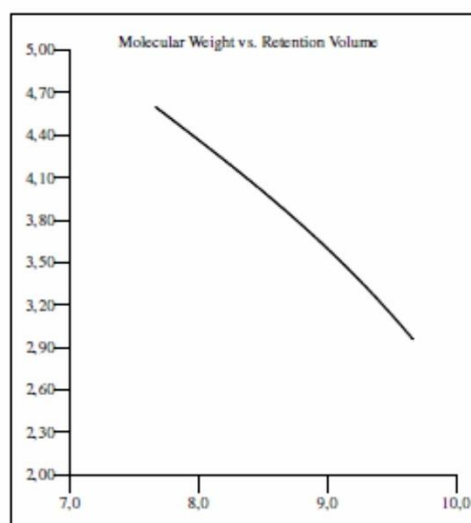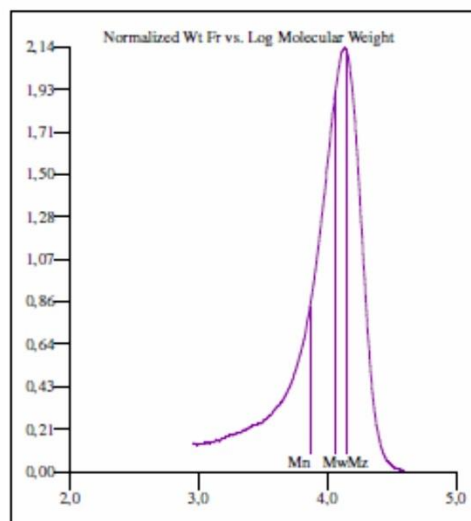

Figure S61. GPC eluogram of PLA obtained with **1** in THF at  $-20^{\circ}\text{C}$ , Table 1, entry 12.



FileName: ...-16.1\_DCTB\_K\_RP700-3500\_P36\_c50\0\_J15\1\1SRef\data\1\peaklist.xml  
 peak integrals - NM 16.1 (CHCl<sub>3</sub>)  
 DCTB+K RP 700-3500 Da P=36% c=50

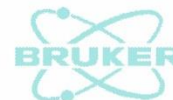

\* 1000

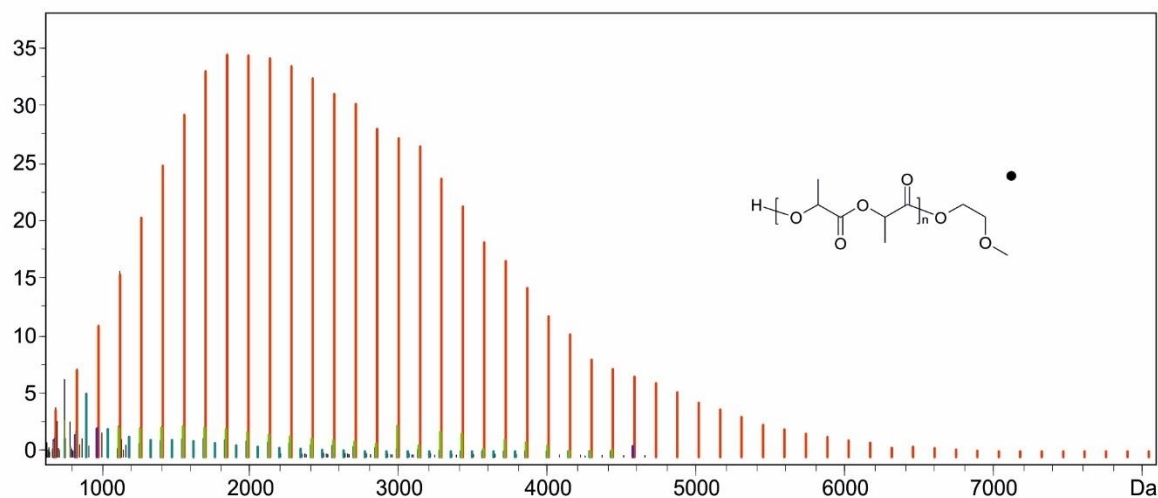

| n | ser. | rep.unit | resid.  | end1 | end2 | cation  | Mn      | Mw      | pd      | DP      | % I. | cnt |
|---|------|----------|---------|------|------|---------|---------|---------|---------|---------|------|-----|
| 1 | 1    | 144.039  | 76.4330 |      |      | 38.9637 | 2646.90 | 3172.81 | 1.19869 | 18.3763 | 73.7 | 67  |
| 2 | 2    | 144.039  | 64.2882 |      |      | 38.9637 | 1400.07 | 2081.71 | 1.48686 | 9.72007 | 4.2  | 29  |
| 3 | 3    | 144.039  | 67.9886 |      |      | 38.9637 | 2157.18 | 2483.63 | 1.15133 | 14.9763 | 3.9  | 24  |
| 4 | 4    | 144.039  | 138.463 |      |      | 38.9637 | 1339.16 | 1817.11 | 1.35690 | 9.29722 | 3.4  | 24  |
| 5 | 5    | 37.9089  | 31.5287 |      |      | 38.9637 | 589.187 | 618.076 | 1.04903 | 15.5422 | 4    | 12  |

D:\Dane\Mass\_Spectra\Rok\_2021\Work\NM-16.1\_DCTB\_K\_RP700-3500\_P36\_c50\0\_J15\1\1SRef

Comment 1 NM 16.1 (CHCl<sub>3</sub>)  
 Comment 2 DCTB+K RP 700-3500 Da P=36% c=50

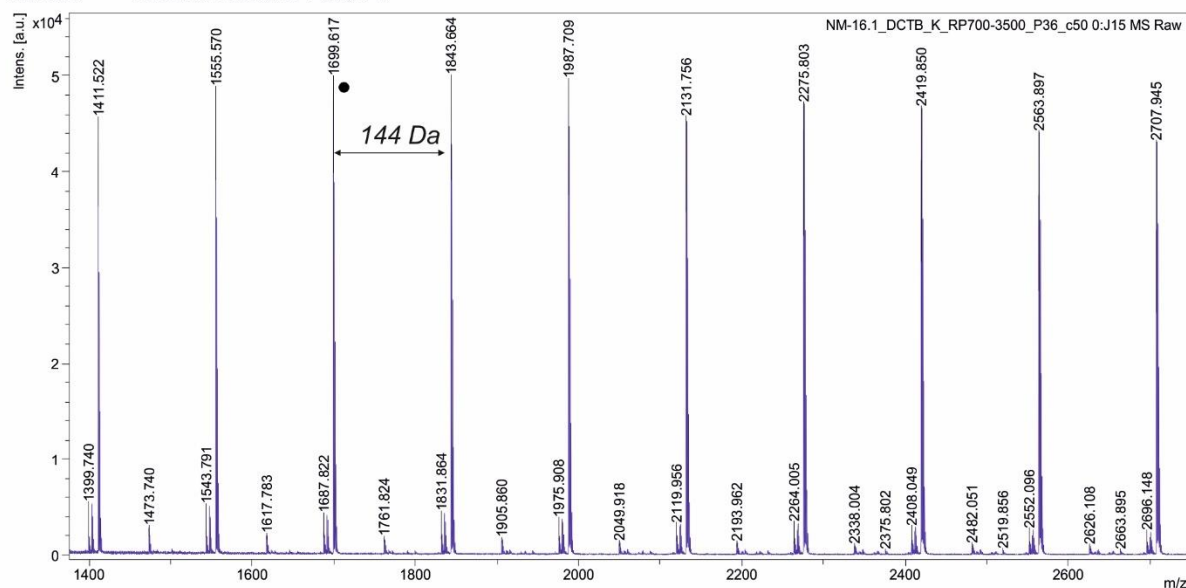

Bruker Daltonics flexAnalysis

page 1 of 1 17:16:12

**Figure S62.** MALDI-TOF spectrum of PLA obtained with **1** in THF at  $-40^{\circ}\text{C}$ , Table 1, entry 15. Figure 1 (—)

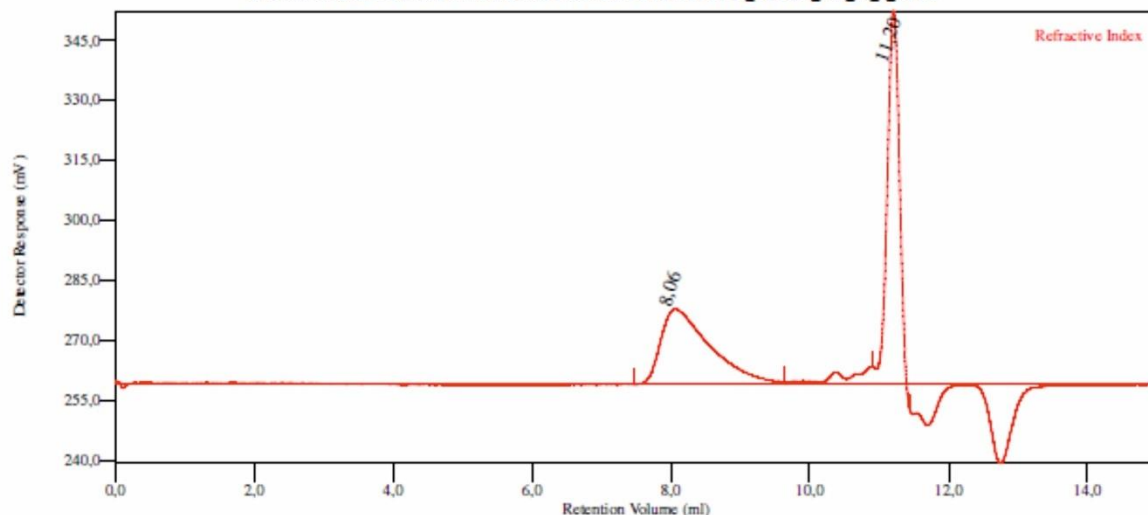

Conventional Calibration - Homopolymers : Results

|                         |        |         |
|-------------------------|--------|---------|
| Peak RV - (ml)          | 8.060  | 11.200  |
| Mn - (Daltons)          | 10 163 | 0       |
| Mw - (Daltons)          | 16 413 | 0       |
| Mz - (Daltons)          | 21 080 | 0       |
| Mp - (Daltons)          | 21 463 | 0       |
| Mw / Mn                 | 1.615  | 0.000   |
| Percent Above Mw:       | 0      | 100.000 |
| Percent Below Mw:       | 0      | 0.000   |
| Mw 10.0% Low            | 3 354  | 0       |
| Mw 10.0% High           | 32 497 | 0       |
| Wt Fr (Peak)            | 1.000  | 0.000   |
| RI Area - (mv ml)       | 15.60  | 18.71   |
| UV@240nm Area - (mv ml) | 0.00   | 0.00    |

|                          |                                             |
|--------------------------|---------------------------------------------|
| Annotation               |                                             |
| Method File              | CC_RI_PS_2021-09_z_dnia_2022-01-05-0003.vcm |
| Limits File              |                                             |
| Date Acquired            | Jan 14, 2022 - 12:16:54                     |
| Solvent                  | Chlorek metyleno                            |
| Acquisition Operator     | admin : Administrator                       |
| Calculation Operator     | admin : Administrator                       |
| Column Set               | Jordi DVB Mixed Bed                         |
| System                   | QDA MB                                      |
| Flow Rate - (ml/min)     | 1.000                                       |
| Ini Volume - (ul)        | 30.0                                        |
| Volume Increment - (ml)  | 0.00333                                     |
| Detector Temp. - (deg C) | 30.0                                        |
| Column Temp. - (deg C)   | 30.0                                        |
| OmniSEC Build Number     | 467                                         |

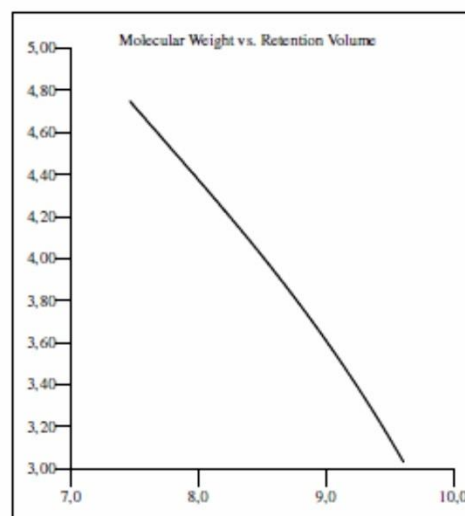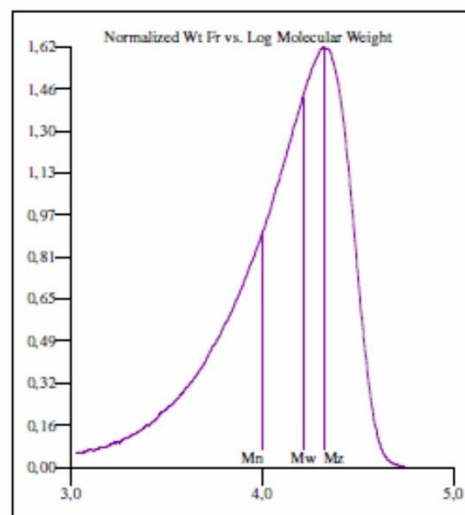

Figure S63. GPC eluogram of PLA obtained with **1** in THF at  $-40^{\circ}\text{C}$ , Table 1, entry 15.

FileName: ...B\_K\_RP700-3500\_P34\_c25\_defl0640\0\_C17\1\1SRef\data\1\peaklist.xml  
 peak integrals - IG-1,1 [CHCl3]  
 DCTB+K RP 700-3500 Da P=34% c=25 defl=640 Da

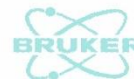

\* 1000

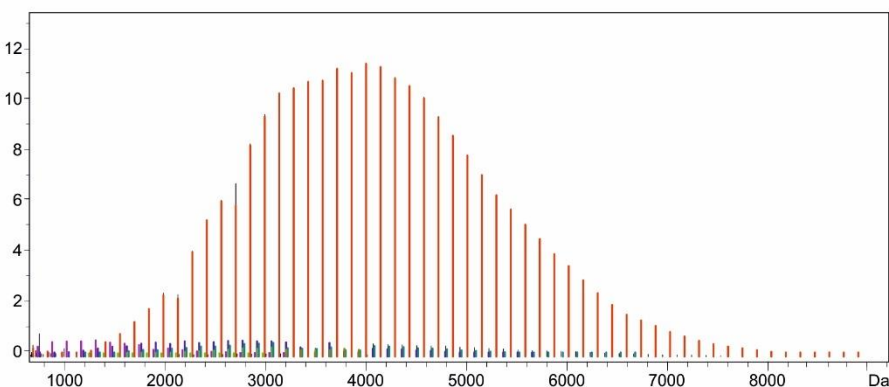

| n | ser. | rep.unit | resid.   | end1 | end2 | cation  | Mn      | Mw      | pd      | DP      | % I. | cnt |
|---|------|----------|----------|------|------|---------|---------|---------|---------|---------|------|-----|
| 1 | 1    | 144.035  | 75.9395  |      |      | 38.9637 | 4082.78 | 4458.89 | 1.09212 | 28.3459 | 83.5 | 58  |
| 2 | 2    | 144.035  | -0.37868 |      |      | 38.9637 | 2779.97 | 3206.80 | 1.15354 | 19.3007 | 3.7  | 35  |
| 3 | 3    | 144.035  | 3.46072  |      |      | 38.9637 | 2973.30 | 3104.11 | 1.04399 | 20.6430 | 1    | 17  |
| 4 | 4    | 144.035  | 18.0274  |      |      | 38.9637 | 3509.73 | 3966.43 | 1.13013 | 24.3673 | 3.4  | 39  |
| 5 | 5    | 144.035  | 3.94192  |      |      | 38.9637 | 3577.39 | 3596.33 | 1.00529 | 24.8371 | 0.4  | 6   |
| 6 | 6    | 144.035  | 122.220  |      |      | 38.9637 | 1548.93 | 1799.59 | 1.16183 | 10.7539 | 2    | 18  |
| 7 | 7    | 144.035  | 56.0008  |      |      | 38.9637 | 2106.83 | 2239.85 | 1.06314 | 14.6272 | 0.4  | 13  |

\*

\* May originate from hydrolysis of PLA during quenching with H<sub>2</sub>O/H<sup>+</sup>

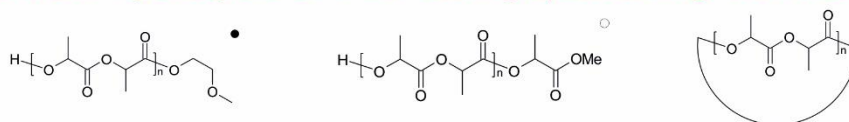

D:\Dane\Mass\_Spectra\Rok\_2023\Work\IG-1-1\_DCTB\_K\_RP700-3500\_P34\_c25\_defl0640\0\_C17\1\1SRef

Comment 1 IG-1,1 [CHCl3]

Comment 2 DCTB+K RP 700-3500 Da P=34% c=25 defl=640 Da

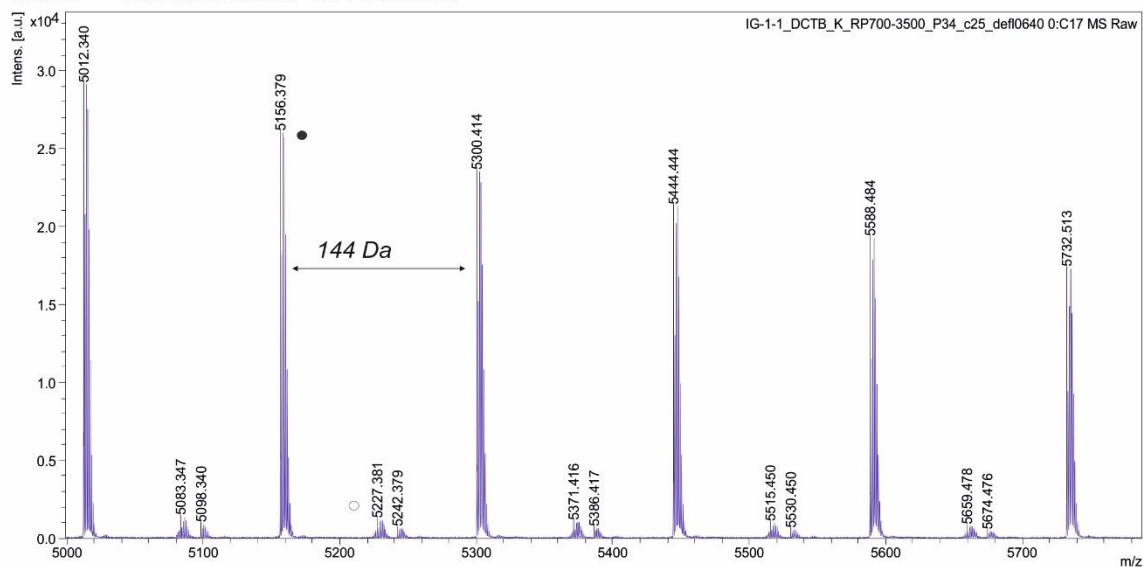

Bruker Daltonics flexAnalysis

printed: 8/1/2023 14:31:57

Figure S64. MALDI-TOF spectrum of PLA obtained with **2** in toluene at 40°C, Table 1, entry

16. Figure 2 (—)



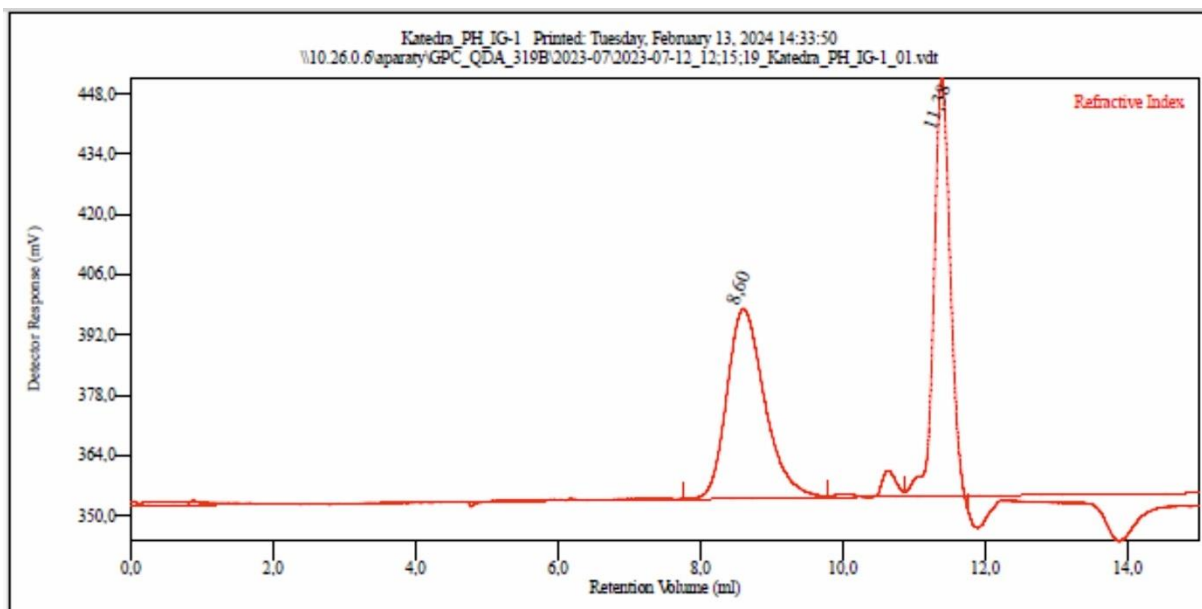

Conventional Calibration - Homopolymers : Results

|                         |        |         |
|-------------------------|--------|---------|
| Peak RV - (ml)          | 8.597  | 11.383  |
| Mn - (Daltons)          | 8 684  | 0       |
| Mw - (Daltons)          | 10 984 | 0       |
| Mz - (Daltons)          | 12 981 | 0       |
| Mp - (Daltons)          | 11 361 | 0       |
| Mw / Mn                 | 1.265  | 0.000   |
| Percent Above Mw:       | 0      | 100.000 |
| Percent Below Mw:       | 0      | 0.000   |
| Mw 10.0% Low            | 3 874  | 0       |
| Mw 10.0% High           | 20 199 | 0       |
| Wt Fr (Peak)            | 1.000  | 0.000   |
| RI Area - (uv*ml)       | 27.08  | 25.77   |
| UV@240nm Area - (uv*ml) | 0.00   | 0.00    |

| Annotation               |                           |
|--------------------------|---------------------------|
| Method File              | CC PS RI 2023-07-0012.vcm |
| Limits File              |                           |
| Date Acquired            | Jul 12, 2023 - 12:15:19   |
| Solvent                  | Chlorek merylemi          |
| Acquisition Operator     | admin : Administrator     |
| Calculation Operator     | admin : Administrator     |
| Column Set               | Jordi DVB Mixed Bed       |
| System                   | QDA                       |
| Flow Rate - (ml/min)     | 1.000                     |
| inj Volume - (ul)        | 30.0                      |
| Volume Increment - (ml)  | 0.00333                   |
| Detector Temp. - (deg C) | 30.0                      |
| Column Temp. - (deg C)   | 30.0                      |
| OmniSEC Build Number     | 467                       |

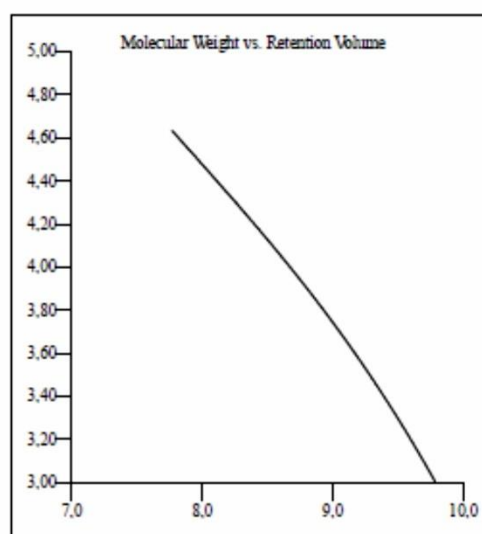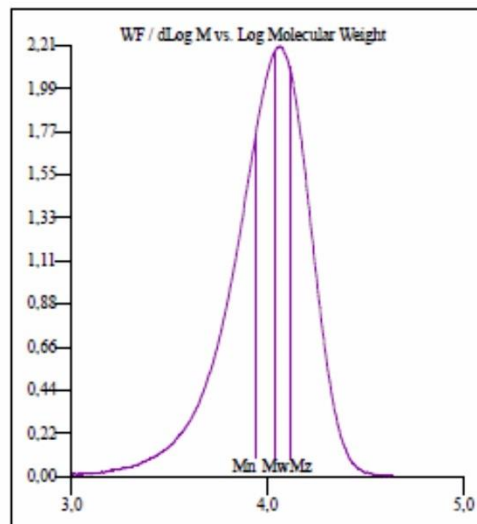

Figure S65. GPC eluogram of PLA obtained with **2** in toluene at 40°C, Table 1, entry 16.

FileName: ...TB\_K\_RP700-3500\_P26\_c25\_defl0640\0\_A18\1\1SRef\data\1\peaklist.xml  
 peak integrals - DT-9,2 [CHCl3]  
 DCTB+K RP 700-3500 Da P=26% c=25 defl=640 Da

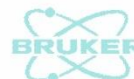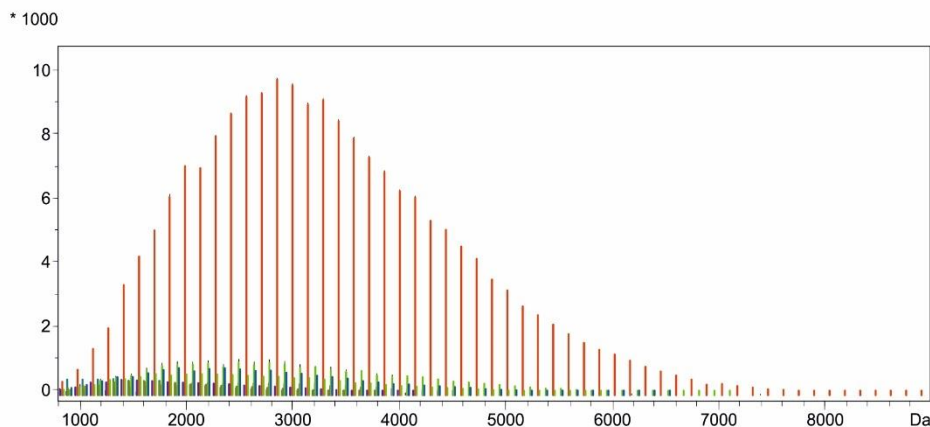

| n | ser. | rep.unit | resid.   | end1 | end2 | cation  | Mn      | Mw      | pd      | DP      | % I. | cnt |
|---|------|----------|----------|------|------|---------|---------|---------|---------|---------|------|-----|
| 1 | 1    | 144.035  | 75.9827  |      |      | 38.9637 | 3304.38 | 3793.78 | 1.14811 | 22.9415 | 71.2 | 58  |
| 2 | 2    | 144.035  | 55.9977  |      |      | 38.9637 | 2068.46 | 2411.88 | 1.16603 | 14.3608 | 2.3  | 25  |
| 3 | 3    | 144.035  | 90.0547  |      |      | 38.9637 | 2693.72 | 3179.83 | 1.18046 | 18.7018 | 4.5  | 37  |
| 4 | 4    | 144.035  | 122.206  |      |      | 38.9637 | 1662.87 | 1955.05 | 1.17571 | 11.5449 | 2.1  | 20  |
| 5 | 5    | 144.035  | 128.007  |      |      | 38.9637 | 1983.68 | 2278.37 | 1.14856 | 13.7722 | 1.9  | 22  |
| 6 | 6    | 144.035  | -0.28390 |      |      | 38.9637 | 2569.05 | 2846.84 | 1.10813 | 17.8363 | 2    | 25  |
| 7 | 7    | 144.035  | 3.51679  |      |      | 38.9637 | 3019.85 | 3559.40 | 1.17867 | 20.9661 | 8.2  | 45  |
| 8 | 8    | 144.035  | 17.9662  |      |      | 38.9637 | 2773.79 | 3277.96 | 1.18176 | 19.2577 | 5.7  | 41  |

\* May originate from hydrolysis of PLA during quenching with H<sub>2</sub>O/H<sup>+</sup>

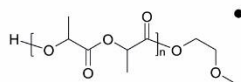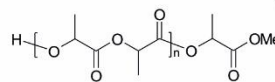

D:\Dane\Mass\_Spectra\Rok\_2023\Work\DT-09-2\_DCTB\_K\_RP700-3500\_P26\_c25\_defl0640\0\_A18\1\1SRef

Comment 1 DT-9,2 [CHCl<sub>3</sub>]  
 Comment 2 DCTB+K RP 700-3500 Da P=26% c=25 defl=640 Da

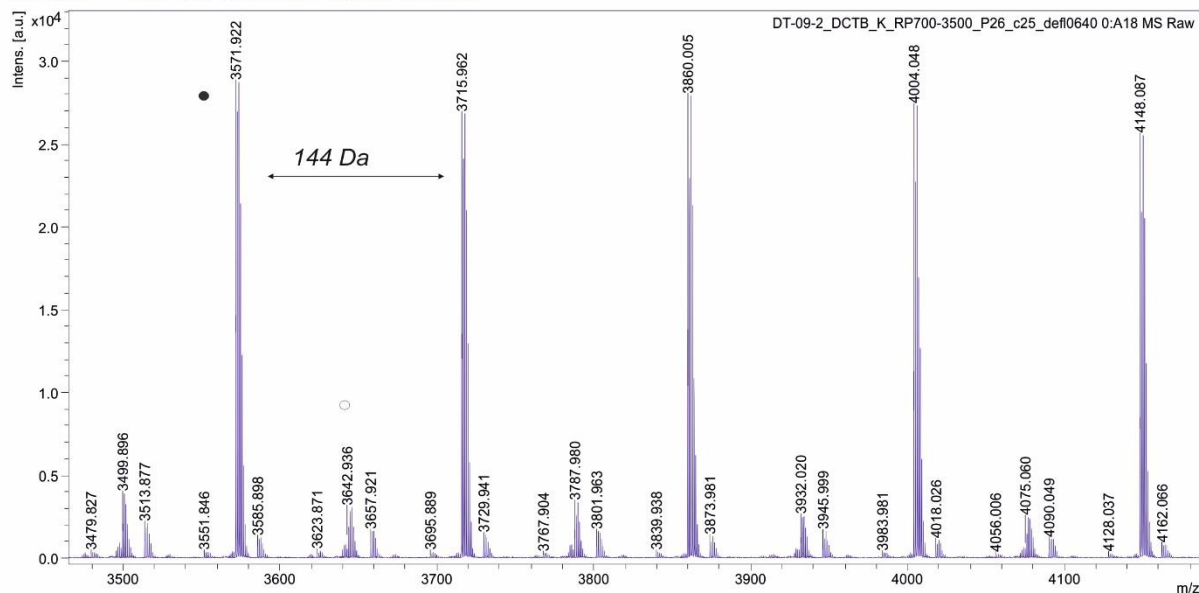

Bruker Daltonics flexAnalysis

printed: 8/1/2023 14:20:41

**Figure S66.** MALDI-TOF spectrum of PLA obtained with **2** in toluene at r.t., Table 1, entry 17. Figure 2 (→)

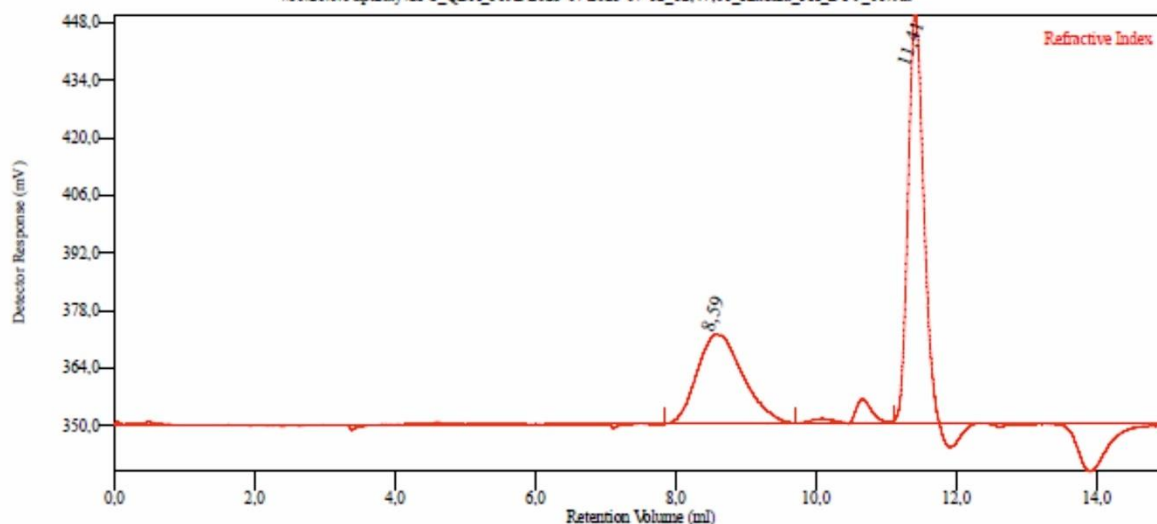

Conventional Calibration - Homopolymers : Results

|                         |         |        |
|-------------------------|---------|--------|
| Peak RV - (ml)          | 8.590   | 11.407 |
| Mn - (Daltons)          | 8771    | 0      |
| Mw - (Daltons)          | 11717   | 0      |
| Mz - (Daltons)          | 14522   | 0      |
| Mp - (Daltons)          | 11878   | 0      |
| Mw / Mn                 | 1.338   | 0.000  |
| Percent Above Mw:       | 100.000 | 0.000  |
| Percent Below Mw:       | 0.000   | 0.000  |
| Mw 10.0% Low            | 3653    | 0      |
| Mw 10.0% High           | 23265   | 0      |
| Wt Fr (Peak)            | 1.000   | 0.000  |
| RI Area - (mVmin)       | 16.32   | 25.81  |
| UV@240nm Area - (mVmin) | 0.00    | 0.00   |

| Annotation               |                           |
|--------------------------|---------------------------|
| Method File              | CC PS RI 2023-07-0012.vcm |
| Limits File              |                           |
| Date Acquired            | Jul 12, 2023 - 12:47:01   |
| Solvent                  | Chlorek metylen           |
| Acquisition Operator     | admin : Administrator     |
| Calculation Operator     | admin : Administrator     |
| Column Set               | Jordi DVB Mixed Bed       |
| System                   | QDA                       |
| Flow Rate - (ml/min)     | 1.000                     |
| Ini Volume - (ul)        | 30.0                      |
| Volume Increment - (ml)  | 0.00333                   |
| Detector Temp. - (deg C) | 30.0                      |
| Column Temp. - (deg C)   | 30.0                      |
| OmniSEC Build Number     | 467                       |

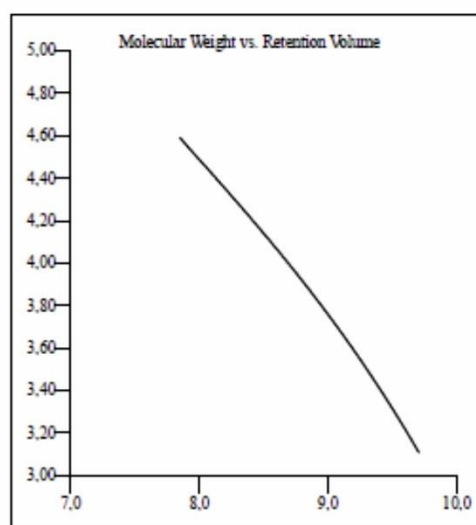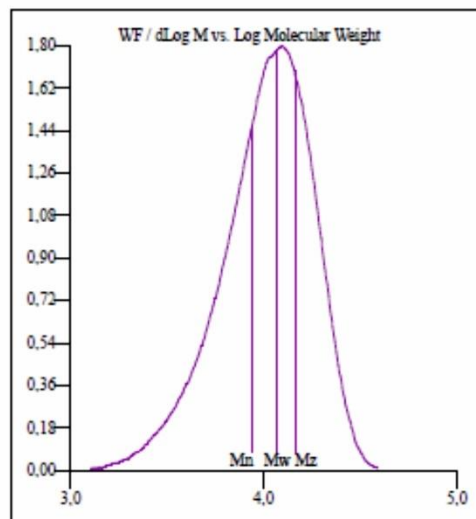

Figure S67. GPC eluogram of PLA obtained with **2** in toluene at r.t., Table 1, entry 17.

FileName: ...TB\_K\_RP700-3500\_P34\_c25\_def0640\0\_B24\1\1SRef\pdata1\peaklist.xml  
 peak integrals - DT-15,1 [CHCl3]  
 DCTB+K RP 700-3500 Da P=34% c=25

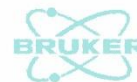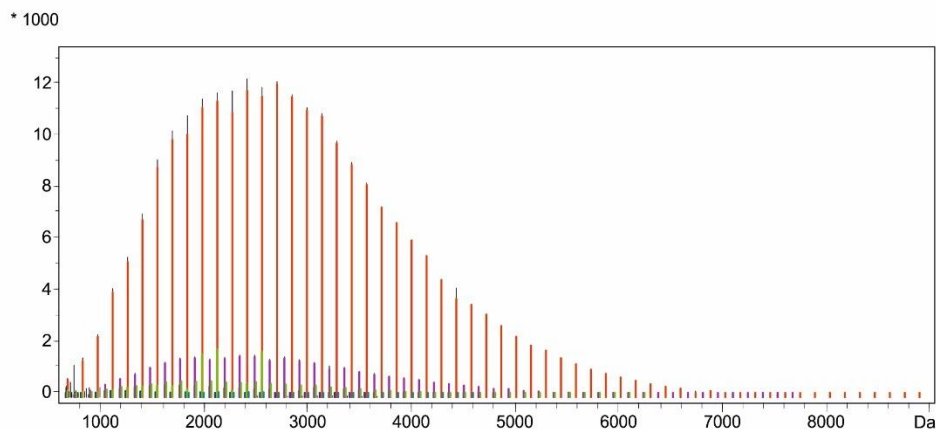

| n | ser. | rep.unit | resid.  | end1     | end2 | cation  | Mn      | Mw      | pd      | DP      | % I. | cnt |
|---|------|----------|---------|----------|------|---------|---------|---------|---------|---------|------|-----|
| ● | 1    | 1        | 144.041 | 75.9214  |      | 38.9637 | 2882.58 | 3377.71 | 1.17177 | 20.0122 | 78   | 58  |
| ■ | 2    | 2        | 144.041 | 55.9961  |      | 38.9637 | 1793.91 | 2106.40 | 1.17420 | 12.4542 | 0.9  | 21  |
| ■ | 3    | 3        | 144.041 | 71.6743  |      | 38.9637 | 1669.40 | 1838.30 | 1.10118 | 11.5898 | 1.3  | 14  |
| ■ | 4    | 4        | 144.041 | 89.9821  |      | 38.9637 | 2914.65 | 3119.45 | 1.07026 | 20.2349 | 0.6  | 20  |
| ■ | 5    | 5        | 144.041 | -0.10421 |      | 38.9637 | 2258.30 | 2676.31 | 1.18510 | 15.6782 | 2.1  | 29  |
| ○ | 6    | 6        | 144.041 | 3.84777  |      | 38.9637 | 2829.32 | 3344.32 | 1.18202 | 19.6425 | 10   | 49  |
| ■ | 7    | 7        | 144.041 | 18.0425  |      | 38.9637 | 2596.87 | 3085.59 | 1.18819 | 18.0287 | 3.6  | 39  |

Traces may originate from hydrolysis of PLA during quenching with H<sub>2</sub>O/H<sup>+</sup>

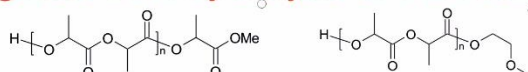

D:\Dane\Mass\_Spectra\Rok\_2023\Work\DT-15-1\_DCTB\_K\_RP700-3500\_P34\_c25\_def0640\0\_B24\1\1SRef

Comment 1 DT-15,1 [CHCl<sub>3</sub>]  
 Comment 2 DCTB+K RP 700-3500 Da P=34% c=25

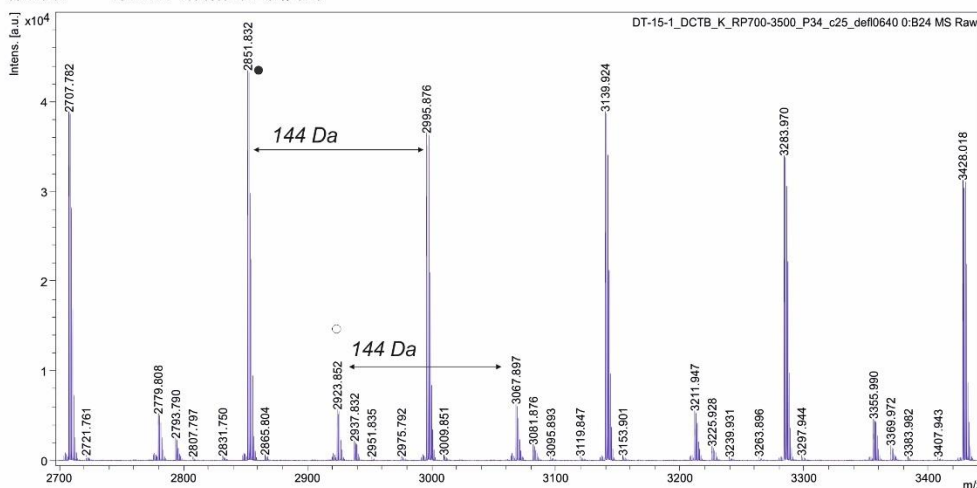

Bruker Daltonics flexAnalysis

printed: 8/1/2023 14:28:47

**Figure S68.** MALDI-TOF spectrum of PLA obtained with **2** in toluene at 0°C, Table 1, entry 20. Figure 2 (—)

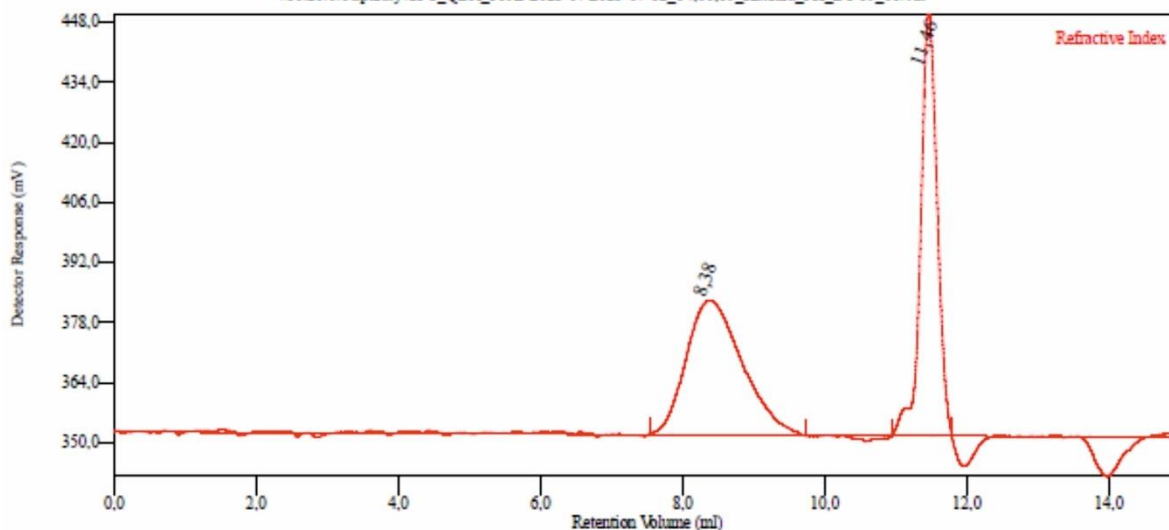

Conventional Calibration - Homopolymers : Results

|                         |         |        |
|-------------------------|---------|--------|
| Peak RV - (ml)          | 8.377   | 11.460 |
| Mn - (Daltons)          | 11 860  | 0      |
| Mw - (Daltons)          | 17 462  | 0      |
| Mz - (Daltons)          | 22 973  | 0      |
| Mp - (Daltons)          | 17 959  | 0      |
| Mw / Mn                 | 1.472   | 0.000  |
| Percent Above Mw:       | 100.000 | 0.000  |
| Percent Below Mw:       | 0.000   | 0.000  |
| Mw 10.0% Low            | 4 480   | 0      |
| Mw 10.0% High           | 37 854  | 0      |
| Wt Fr (Peak)            | 1.000   | 0.000  |
| RI Area - (mVmin)       | 28.52   | 26.54  |
| UV@240nm Area - (mVmin) | 0.00    | 0.00   |

| Annotation               |                           |
|--------------------------|---------------------------|
| Method File              | CC PS RI 2023-07-0012.vcm |
| Limits File              |                           |
| Date Acquired            | Jul 12, 2023 - 14:06:15   |
| Solvent                  | Chlorek merylem           |
| Acquisition Operator     | admin : Administrator     |
| Calculation Operator     | admin : Administrator     |
| Column Set               | Jordi DVB Mixed Bed       |
| System                   | QDA                       |
| Flow Rate - (ml/min)     | 1.000                     |
| inj Volume - (ul)        | 30.0                      |
| Volume Increment - (ml)  | 0.00333                   |
| Detector Temp. - (deg C) | 30.0                      |
| Column Temp. - (deg C)   | 30.0                      |
| OmniSEC Build Number     | 467                       |

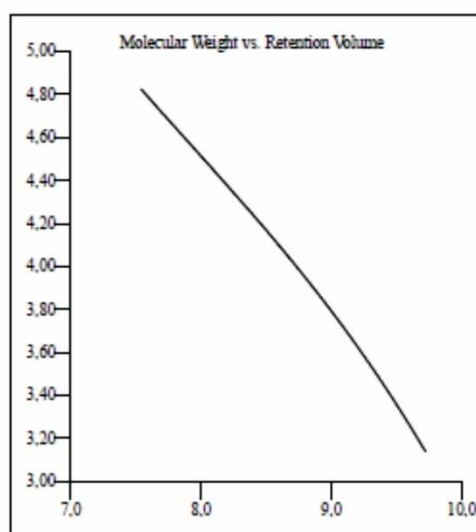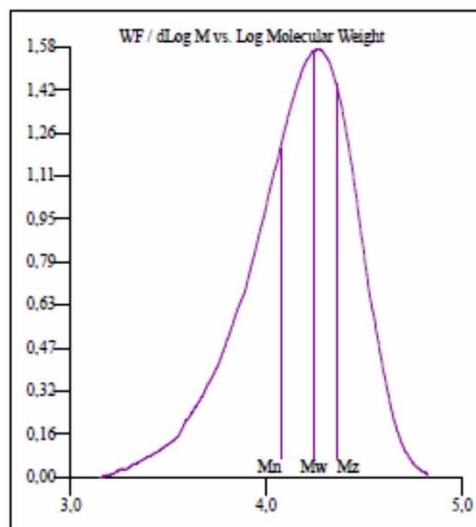

Figure S69. GPC eluogram of PLA obtained with **2** in toluene at 0°C, Table 1, entry 20.



FileName: ...DCTB\_K\_RP05-20k\_P43\_c25\_defl600\0\_D20\1\1SRef\pdata\1\peaklist.xml  
 peak integrals - PG-011 [PLA] [CHCl3]  
 DCTB+K RP 05-20 kDa P=43% c=25 defl=600 Da

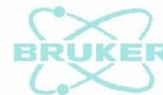

\* 1000

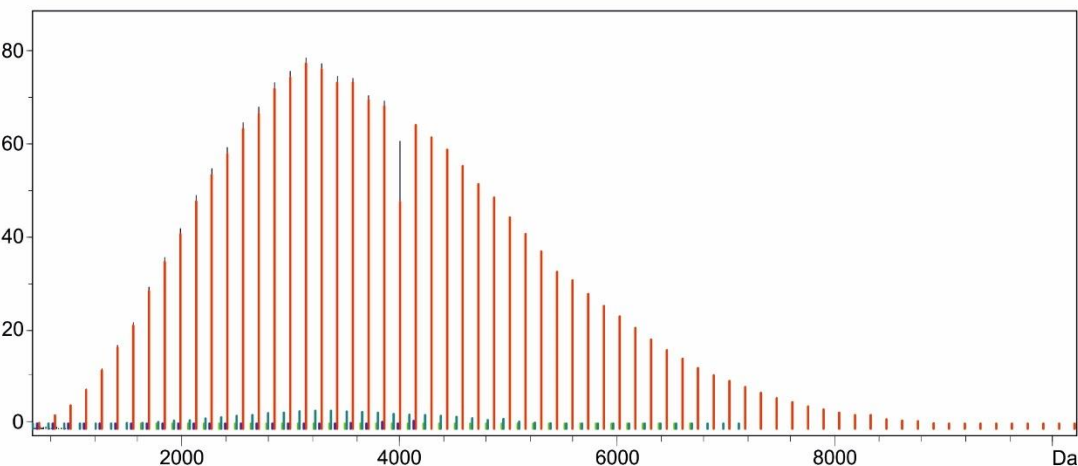

| n | ser. | rep.unit | resid.  | end1 | end2 | cation  | Mn      | Mw      | pd      | DP      | % I. | cnt |
|---|------|----------|---------|------|------|---------|---------|---------|---------|---------|------|-----|
| 1 | 1    | 144.042  | 75.5290 |      |      | 38.9637 | 3844.87 | 4436.29 | 1.15382 | 26.6927 | 94   | 73  |
| 2 | 2    | 144.042  | 55.7392 |      |      | 38.9637 | 2267.64 | 2661.64 | 1.17375 | 15.7429 | 0.2  | 25  |
| 3 | 3    | 144.042  | 2.65078 |      |      | 38.9637 | 3806.54 | 4109.31 | 1.07954 | 26.4265 | 0.6  | 36  |
| 4 | 4    | 144.042  | 17.5127 |      |      | 38.9637 | 3408.24 | 3797.83 | 1.11431 | 23.6614 | 3.7  | 46  |

Traces

May originate from hydrolysis of PLA during quenching with H<sub>2</sub>O/H<sup>+</sup>

D:\Dane\Mass\_Spectra\Rok\_2022\Work\PG-011\_PLA\_DCTB\_K\_RP05-20k\_P43\_c25\_defl600\0\_D20\1\1SRef

Comment 1 PG-011 [PLA] [CHCl<sub>3</sub>]  
 Comment 2 DCTB+K RP 05-20 kDa P=43% c=25 defl=600 Da

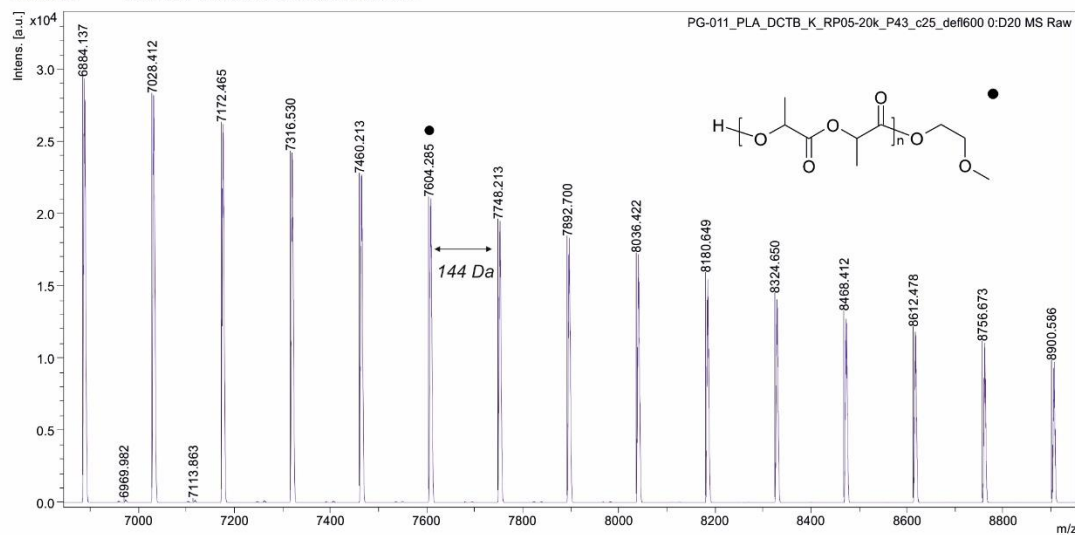

Bruker Daltonics flexAnalysis

printed: 12/6/2022 19:34:33

page 1 of 1

**Figure S70.** MALDI-TOF spectrum of PLA obtained with **2** in toluene at  $-20^{\circ}\text{C}$ , Table 1, entry 23. Figure 2 (—)

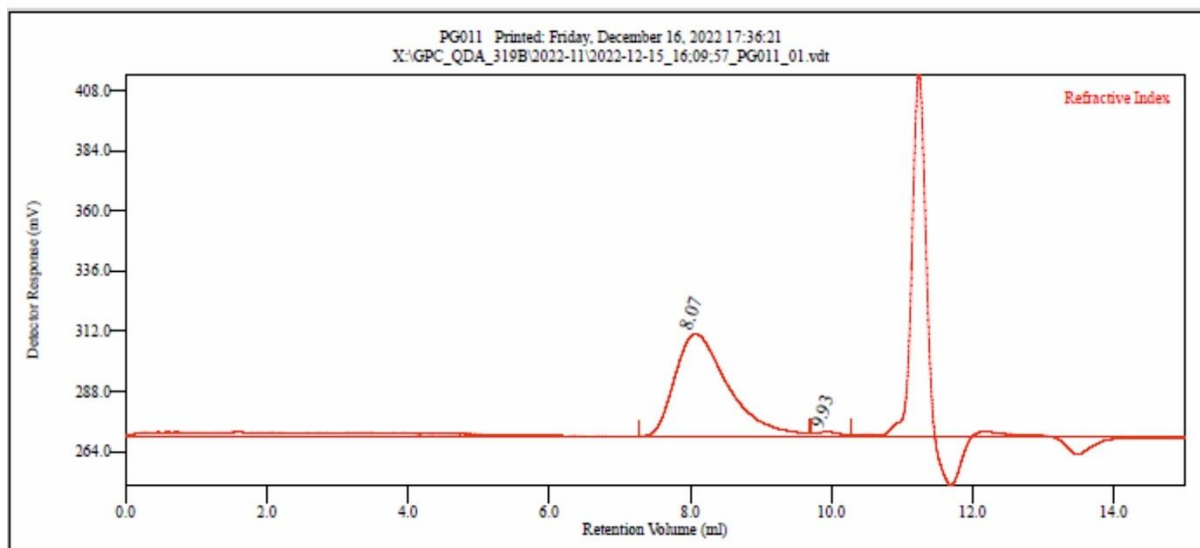

Warning: No flow rate marker was found

Conventional Calibration - Homopolymers : Results

|                        |        |         |
|------------------------|--------|---------|
| Peak RV - (ml)         | 8.067  | 9.930   |
| Mn - (Daltons)         | 11,462 | 531     |
| Mw - (Daltons)         | 18,907 | 598     |
| Mz - (Daltons)         | 24,918 | 662     |
| Mp - (Daltons)         | 20,910 | 606     |
| Mw / Mn                | 1.649  | 1.123   |
| Percent Above Mw:      | 0      | 100.000 |
| Percent Below Mw:      | 0      | 0.000   |
| Mw 10.0% Low           | 3,846  | 301     |
| Mw 10.0% High          | 40,167 | 954     |
| Wt Fr (Peak)           | 0.979  | 0.021   |
| RI Area - (mVml)       | 35.86  | 0.79    |
| UV@240nm Area - (mVml) | 0.00   | 0.00    |

| Annotation               |                                     |
|--------------------------|-------------------------------------|
| Method File              | CC_RI_PS_11-2022-0003-MLry-0001.vcm |
| Limits File              |                                     |
| Date Acquired            | Dec 15, 2022 - 16:09:57             |
| Solvent                  | Chlorek metylemu                    |
| Acquisition Operator     | admin : Administrator               |
| Calculation Operator     | admin : Administrator               |
| Column Set               | Jordi DVB Mixed Bed                 |
| System                   | QDAMB                               |
| Flow Rate - (ml/min)     | 1.000                               |
| Ini Volume - (ul)        | 50.0                                |
| Volume Increment - (ml)  | 0.00333                             |
| Detector Temp. - (deg C) | 30.0                                |
| Column Temp. - (deg C)   | 30.0                                |
| OmniSEC Build Number     | 467                                 |

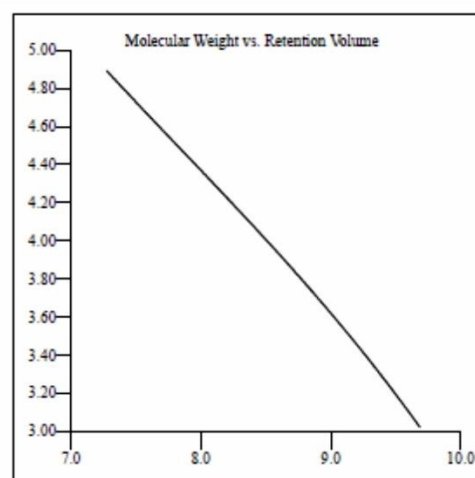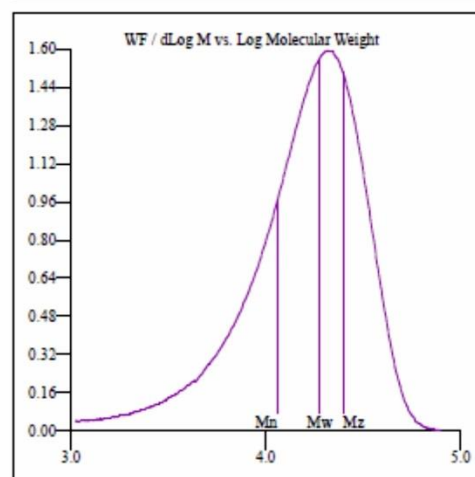

Figure S71. GPC eluogram of PLA obtained with **2** in toluene at  $-20^{\circ}\text{C}$ , Table 1, entry 23.

FileName: ...DCTB\_K\_RP05-20k\_P42\_c25\_defl600\0\_E17\1\1SRef\pdata\1\peaklist.xml  
 peak integrals - PG-012 [PLA] [CHCl3]  
 DCTB+K RP 05-20 kDa P=42% c=25 defl=600 Da

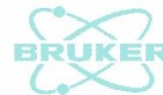

\* 1000

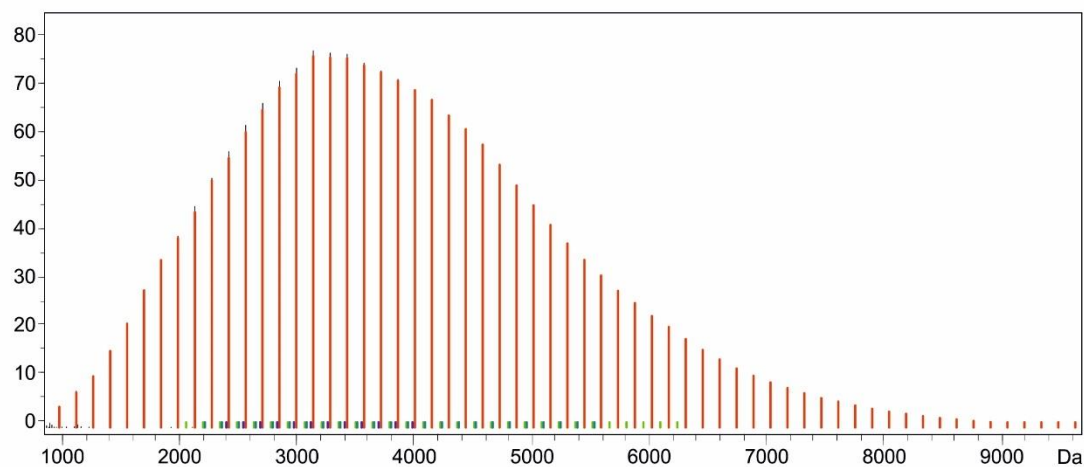

| n | ser. | rep.unit | resid.  | end1 | end2 | cation  | Mn      | Mw      | pd      | DP      | % I. | cnt |
|---|------|----------|---------|------|------|---------|---------|---------|---------|---------|------|-----|
| 1 | 1    | 144.042  | 75.4831 |      |      | 38.9637 | 3868.03 | 4436.31 | 1.14692 | 26.8535 | 98.8 | 73  |
| 2 | 2    | 144.042  | 55.4497 |      |      | 38.9637 | 3063.35 | 3133.94 | 1.02304 | 21.2670 | 0    | 12  |
| 3 | 3    | 144.042  | 2.88355 |      |      | 38.9637 | 3899.12 | 4142.38 | 1.06239 | 27.0692 | 0.3  | 30  |
| 4 | 4    | 144.042  | 17.4573 |      |      | 38.9637 | 3663.47 | 3874.31 | 1.05755 | 25.4333 | 0.1  | 24  |

Traces

D:\Dane\Mass\_Spectra\Rok\_2022\Work\PG-012\_PLA\_DCTB\_K\_RP05-20k\_P42\_c25\_defl600\0\_E17\1\1SRef

Comment 1 PG-012 [PLA] [CHCl3]  
 Comment 2 DCTB+K RP 05-20 kDa P=42% c=25 defl=600 Da

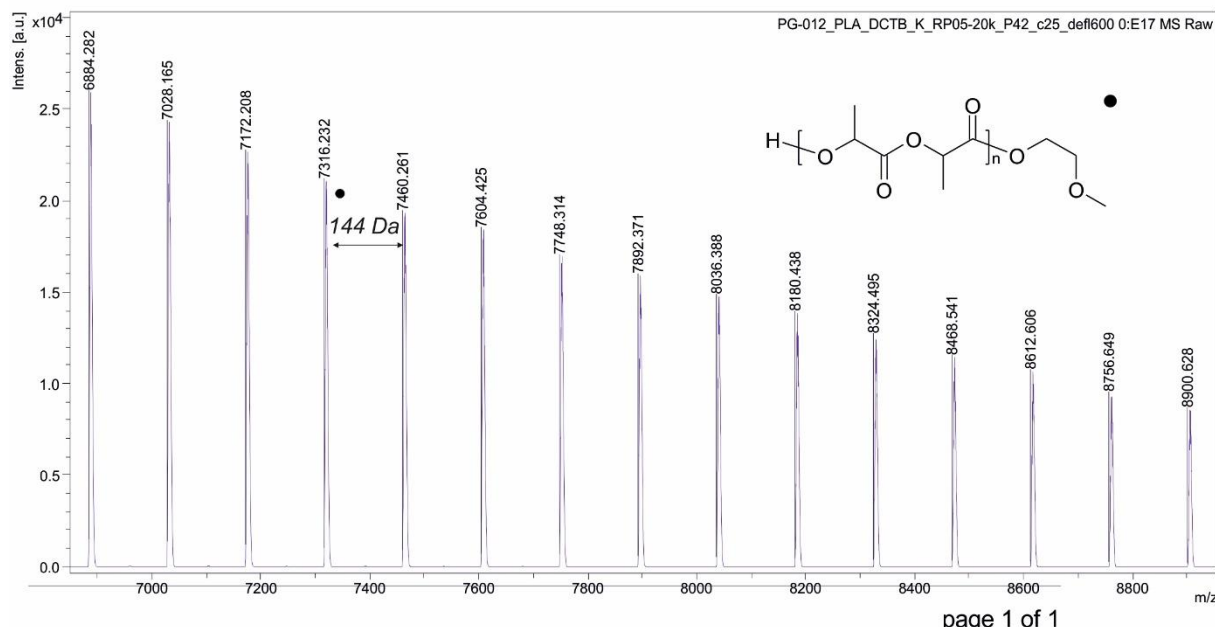

page 1 of 1

Bruker Daltonics flexAnalysis

printed: 12/6/2022 19:25:43

**Figure S72.** MALDI-TOF spectrum of PLA obtained with **2** in toluene at  $-40^{\circ}\text{C}$ , Table 1, entry

26. Figure 2 (—)



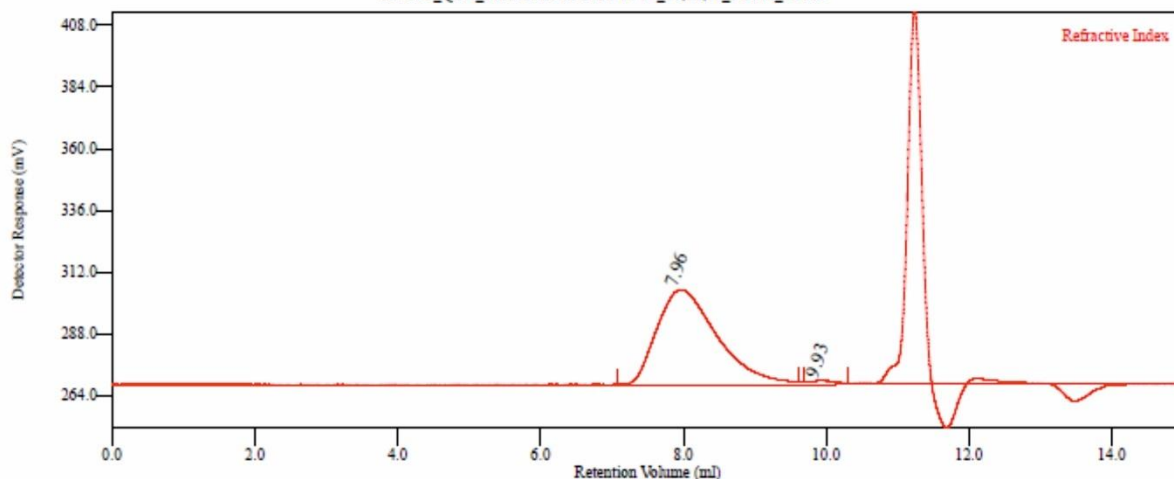

Warning: No flow rate marker was found.

Conventional Calibration - Homopolymers : Results

|                         |        |         |
|-------------------------|--------|---------|
| Peak RV - (ml)          | 7.960  | 9.930   |
| Mn - (Daltons)          | 13,877 | 524     |
| Mw - (Daltons)          | 23,402 | 596     |
| Mz - (Daltons)          | 31,934 | 666     |
| Mp - (Daltons)          | 24,933 | 604     |
| Mw / Mn                 | 1.686  | 1.139   |
| Percent Above Mw:       | 0      | 100.000 |
| Percent Below Mw:       | 0      | 0.000   |
| Mw 10.0% Low            | 4,650  | 286     |
| Mw 10.0% High           | 52,682 | 970     |
| Wt Fr (Peak)            | 0.983  | 0.017   |
| RI Area - (mVmin)       | 35.88  | 0.62    |
| OV@240mm Area - (mVmin) | 0.00   | 0.00    |

| Annotation               |                                      |
|--------------------------|--------------------------------------|
| Method File              | CC_RI_PS_11-2022-0003-MLtry-0001.vcm |
| Limits File              |                                      |
| Date Acquired            | Dec 15, 2022 - 15:22:11              |
| Solvent                  | Chloroform                           |
| Acquisition Operator     | admin : Administrator                |
| Calculation Operator     | admin : Administrator                |
| Column Set               | Jordi DVB Mixed Bed                  |
| System                   | QDAMB                                |
| Flow Rate - (ml/min)     | 1.000                                |
| Inj Volume - (ul)        | 50.0                                 |
| Volume Increment - (ml)  | 0.00333                              |
| Detector Temp. - (deg C) | 30.0                                 |
| Column Temp. - (deg C)   | 30.0                                 |
| OmniSEC Build Number     | 467                                  |

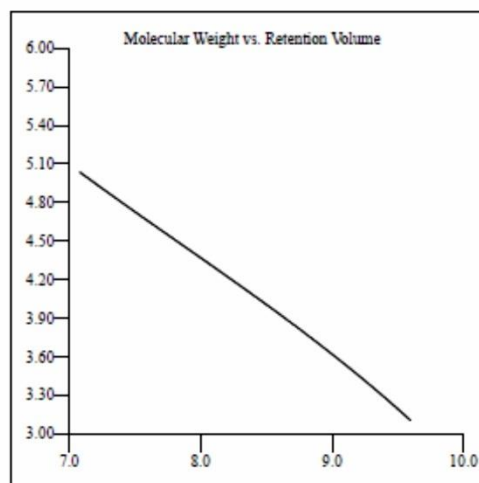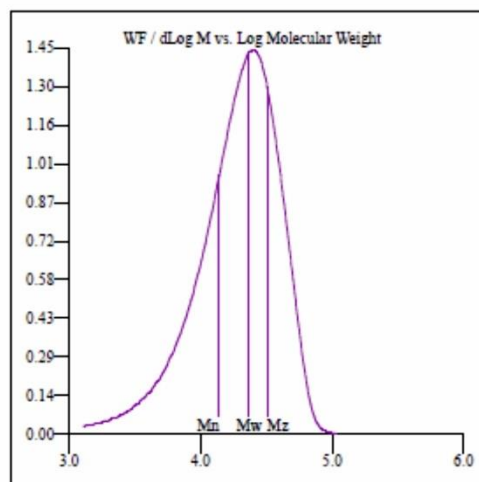

Figure S73. GPC eluogram of PLA obtained with **2** in toluene at  $-40^{\circ}\text{C}$ , Table 1, entry 26.

FileName: ...TB\_K\_RP700-3500\_P38\_c25\_defl0640\0\_B16\1\1SRef\data\1\peaklist.xml  
 peak integrals - DT-13,2 [CHCl<sub>3</sub>]  
 DCTB+K RP 700-3500 Da P=38% c=25 defl=640 Da

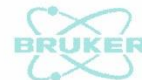

\* 1000

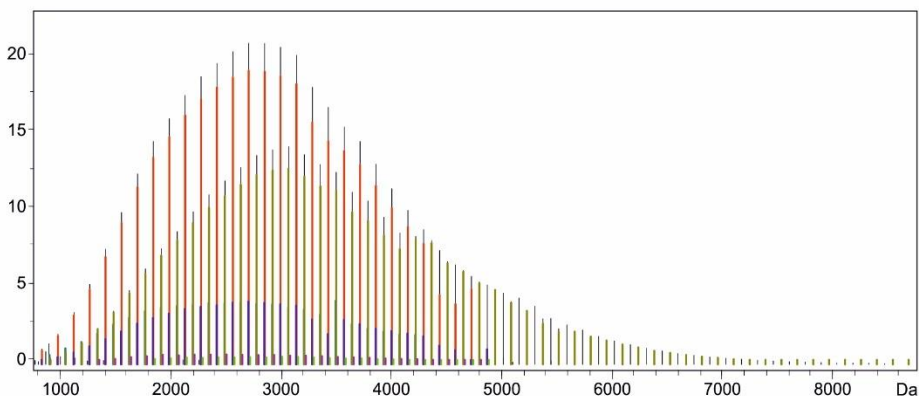

| n   | ser. | rep.unit | resid.  | end1 | end2 | cation  | Mn      | Mw      | pd      | DP      | % I. | cnt |
|-----|------|----------|---------|------|------|---------|---------|---------|---------|---------|------|-----|
| ● 1 | 1    | 144.028  | 75.8146 |      |      | 38.9637 | 2834.07 | 3113.20 | 1.09849 | 19.6772 | 43.7 | 29  |
| ■ 2 | 2    | 144.028  | 72.4182 |      |      | 38.9637 | 2869.62 | 3194.81 | 1.11332 | 19.9241 | 6.9  | 30  |
| ● 3 | 3    | 144.028  | 90.2888 |      |      | 38.9637 | 3101.55 | 3316.81 | 1.06940 | 21.5343 | 0.9  | 22  |
| ■ 4 | 4    | 144.028  | 0.08505 |      |      | 38.9637 | 2536.12 | 2798.01 | 1.10326 | 17.6085 | 8.3  | 25  |
| ○ 5 | 5    | 144.028  | 3.68096 |      |      | 38.9637 | 3359.63 | 3778.97 | 1.12482 | 23.3262 | 32.6 | 55  |
| ■ 6 | 6    | 144.028  | 18.2493 |      |      | 38.9637 | 2824.67 | 3106.02 | 1.09960 | 19.6119 | 1.3  | 25  |

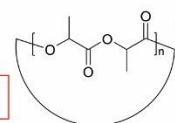

\*

May originate from hydrolysis of PLA during quenching with H<sub>2</sub>O/H<sup>+</sup>

D:\Dane\Mass\_Spectra\Rok\_2023\Work\DT-13-2\_DCTB\_K\_RP700-3500\_P38\_c25\_defl0640\0\_B16\1\1SRef

Comment 1 DT-13,2 [CHCl<sub>3</sub>]  
 Comment 2 DCTB+K RP 700-3500 Da P=38% c=25 defl=640 Da

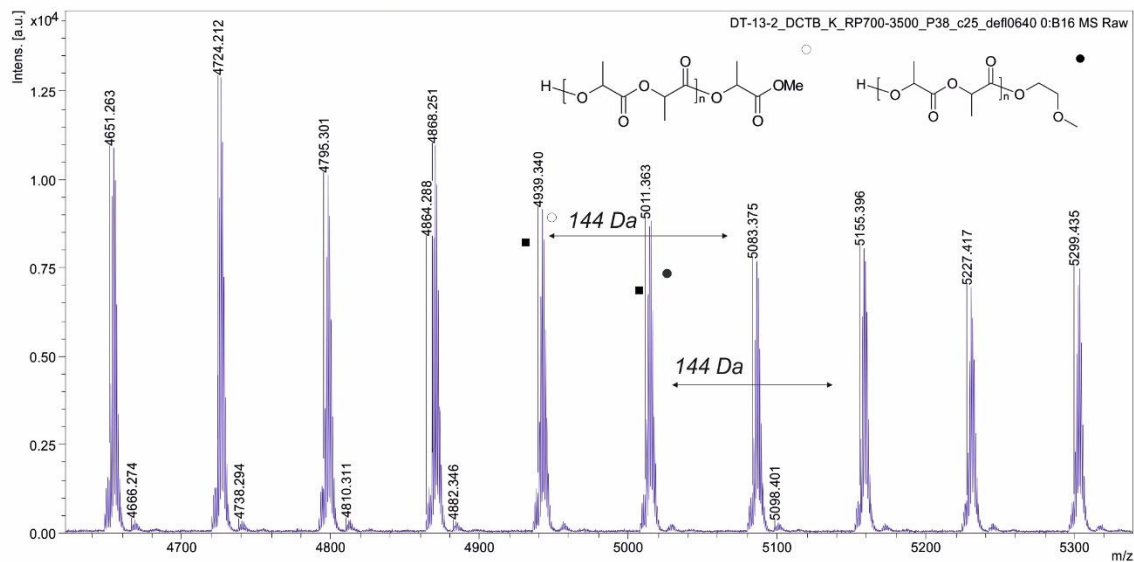

Bruker Daltonics flexAnalysis

printed: 8/1/2023 14:24:41

**Figure S74.** MALDI-TOF spectrum of PLA obtained with **2** in CH<sub>2</sub>Cl<sub>2</sub> at r.t., Table 1, entry 18. Figure 2 (—)

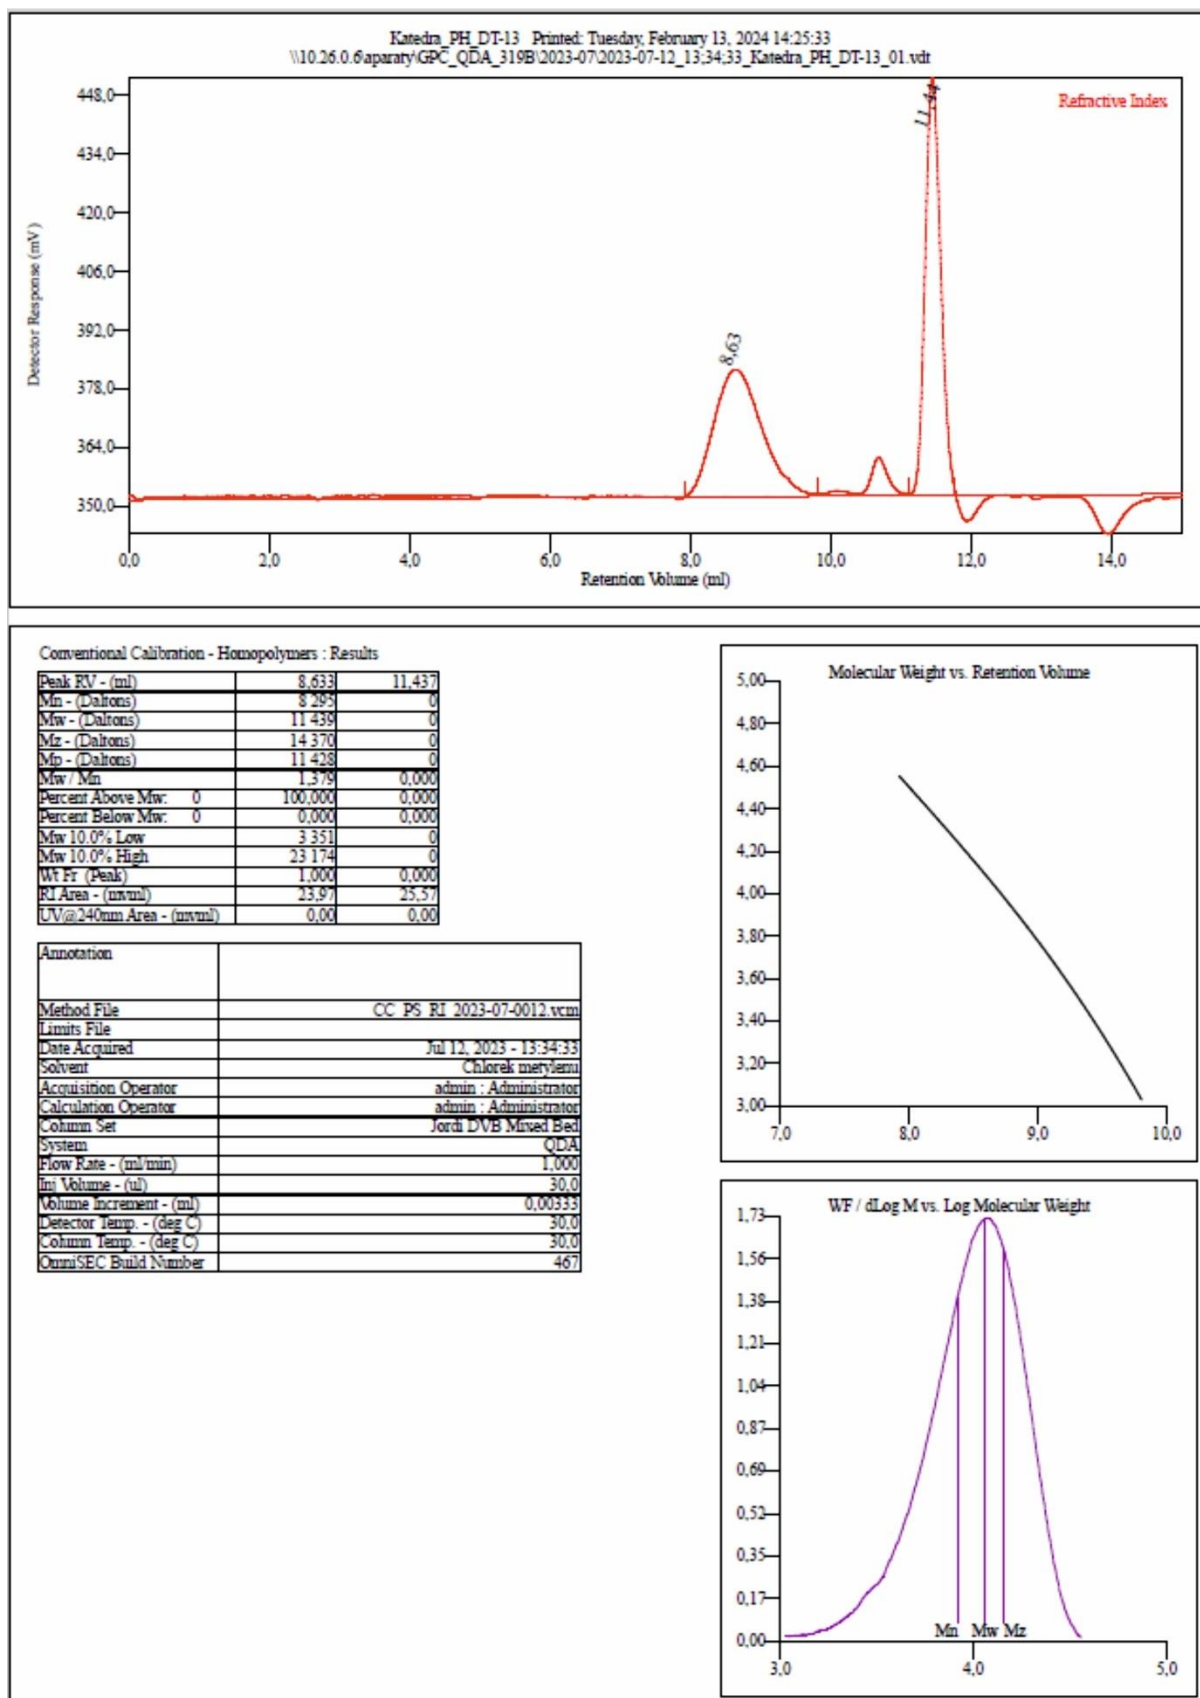

**Figure S75.** GPC eluogram of PLA obtained with **2** in  $\text{CH}_2\text{Cl}_2$  at r.t., Table 1, entry 18.



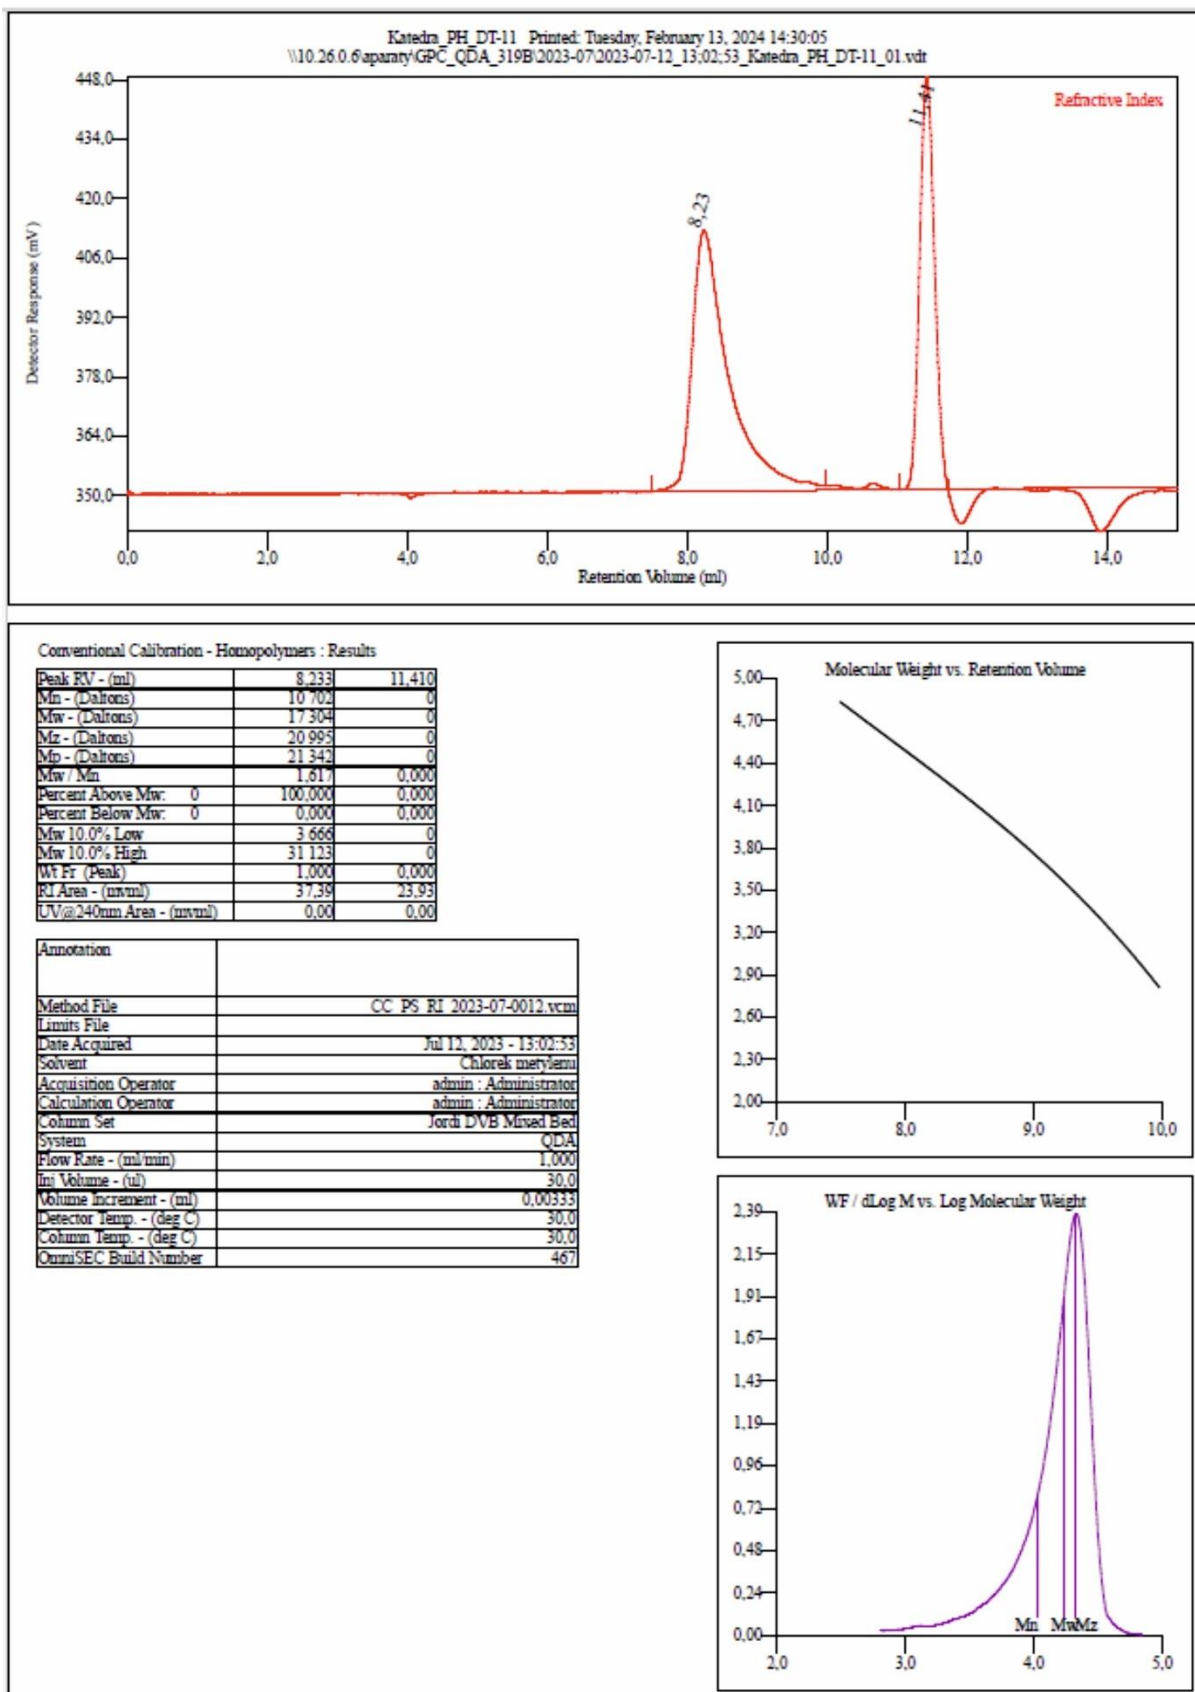

**Figure S77.** GPC eluogram of PLA obtained with **2** in  $\text{CH}_2\text{Cl}_2$  at  $0^\circ\text{C}$ , Table 1, entry 21.



FileName: ...DCTB\_K\_RP05-20k\_P45\_c25\_defl600\0\_D14\1\1SRef\data\1\peaklist.xml  
 peak integrals - PG-009 [PLA] [CHCl3]  
 DCTB+K RP 05-20 kDa P=45% c=25 defl=600 Da

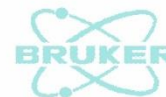

\* 1000

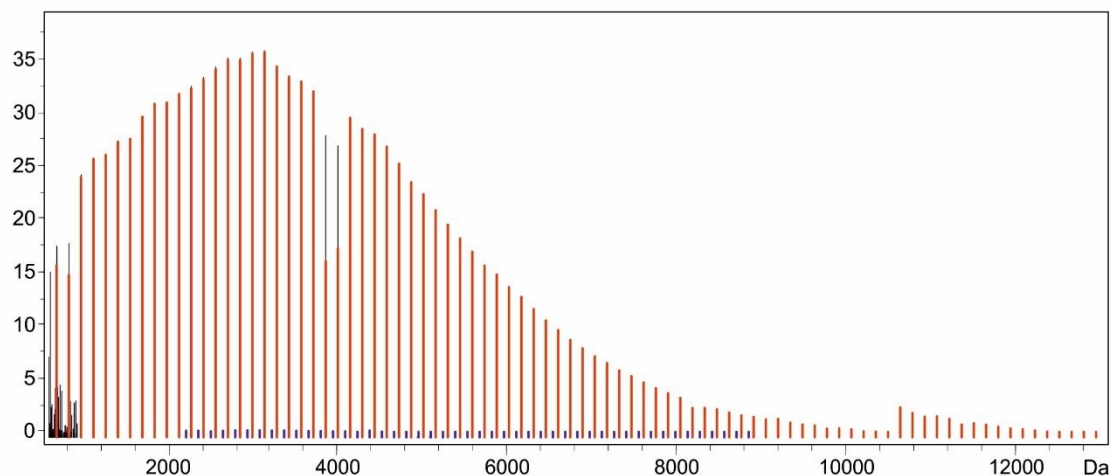

|   | n | ser. | rep.unit | resid.  | end1 | end2 | cation  | Mn      | Mw      | pd      | DP      | % I. | cnt |
|---|---|------|----------|---------|------|------|---------|---------|---------|---------|---------|------|-----|
| • | 1 | 1    | 144.042  | 75.6169 |      |      | 38.9637 | 3756.79 | 4953.89 | 1.31865 | 26.0812 | 90.2 | 86  |
|   | 2 | 2    | 144.042  | 17.1469 |      |      | 38.9637 | 4428.09 | 4860.22 | 1.09759 | 30.7416 | 1.47 |     |

May originate from hydrolysis of PLA during quenching with H<sub>2</sub>O/H<sup>+</sup>

D:\Dane\Mass\_Spectra\Rok\_2022\Work\PG-009\_PLA\_DCTB\_K\_RP05-20k\_P45\_c25\_defl600\0\_D14\1\1SRef

Comment 1 PG-009 [PLA] [CHCl3]  
 Comment 2 DCTB+K RP 05-20 kDa P=45% c=25 defl=600 Da

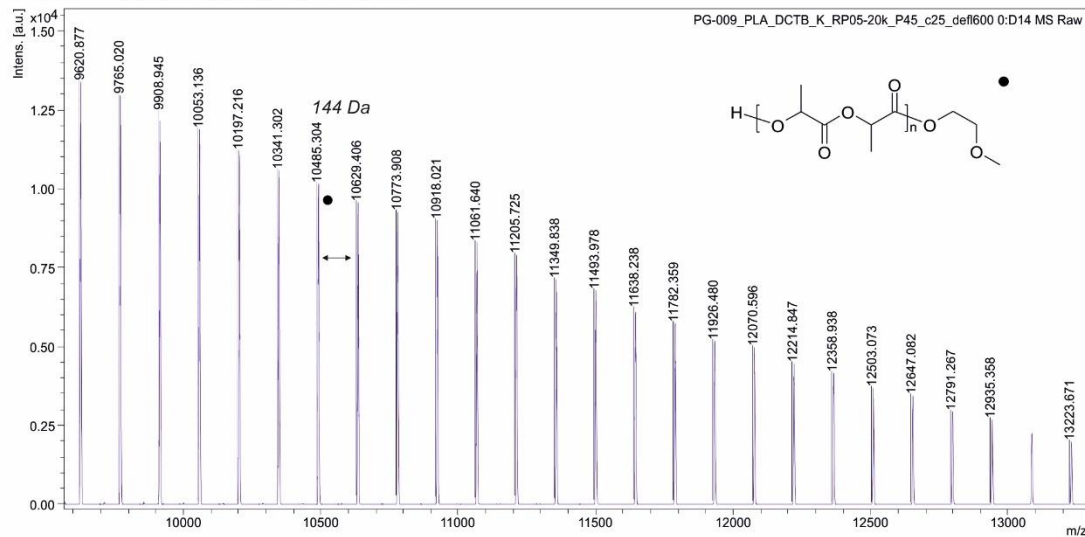

Bruker Daltonics flexAnalysis

printed: 12/6/2022 19:18:52

**Figure S78.** MALDI-TOF spectrum of PLA obtained with **2** in CH<sub>2</sub>Cl<sub>2</sub> at -20°C, Table 1, entry 24. Figure 2 (—)

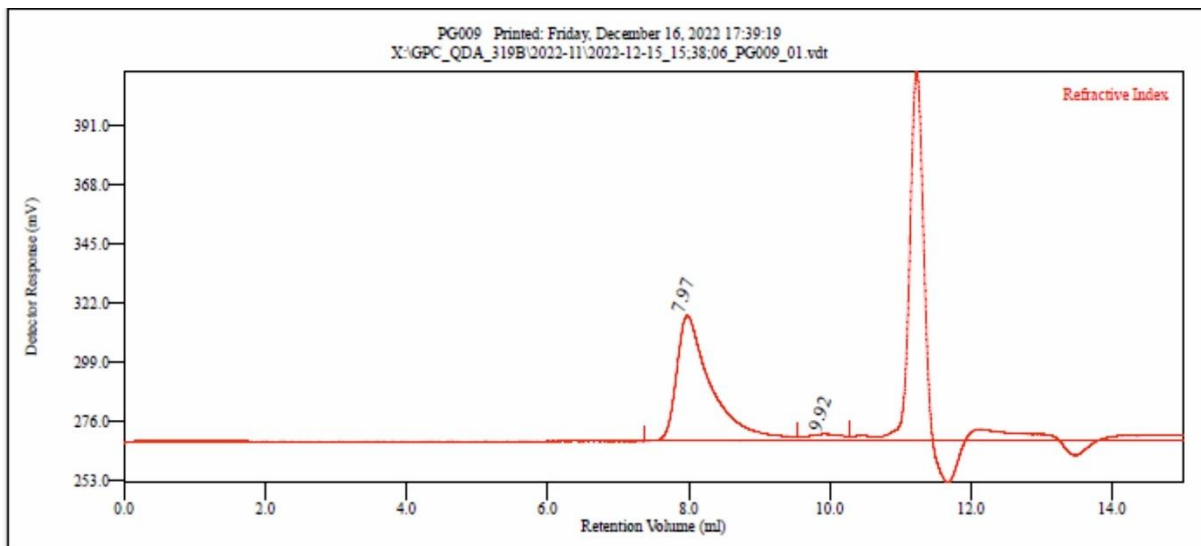

Warning: No flow rate marker was found.

Conventional Calibration - Homopolymers : Results

|                         |        |         |
|-------------------------|--------|---------|
| Peak RV - (ml)          | 7.973  | 9.920   |
| Mn - (Daltons)          | 13,359 | 553     |
| Mw - (Daltons)          | 19,587 | 675     |
| Mz - (Daltons)          | 23,346 | 807     |
| Mp - (Daltons)          | 24,343 | 617     |
| Mw / Mn                 | 1.466  | 1.219   |
| Percent Above Mw:       | 0      | 100.000 |
| Percent Below Mw:       | 0      | 0.000   |
| Mw 10.0% Low            | 4,671  | 288     |
| Mw 10.0% High           | 34,173 | 1,272   |
| Wt Fr (Peak)            | 0.951  | 0.049   |
| RI Area - (mVmin)       | 27.69  | 1.43    |
| UV@240nm Area - (mVmin) | 0.00   | 0.00    |

| Annotation               |                                      |
|--------------------------|--------------------------------------|
| Method File              | CC_RI_PS_11-2022-0003-MLtry-0001.vcm |
| Limits File              |                                      |
| Date Acquired            | Dec 15, 2022 - 15:38:06              |
| Solvent                  | Chlorek metyleni                     |
| Acquisition Operator     | admin : Administrator                |
| Calculation Operator     | admin : Administrator                |
| Column Set               | Jordi DVB Mixed Bed                  |
| System                   | QDA MB                               |
| Flow Rate - (ml/min)     | 1.000                                |
| Ini Volume - (ul)        | 50.0                                 |
| Volume Increment - (ml)  | 0.00333                              |
| Detector Temp. - (deg C) | 30.0                                 |
| Column Temp. - (deg C)   | 30.0                                 |
| OmniSEC Build Number     | 467                                  |

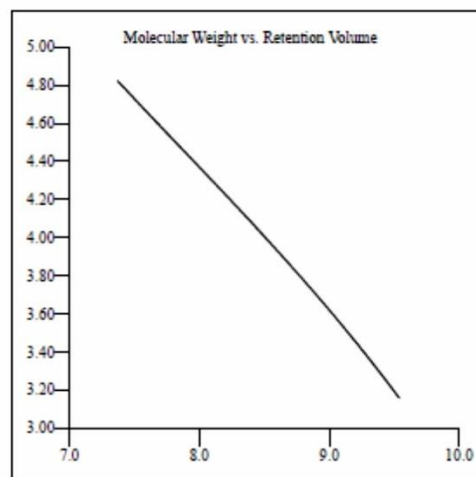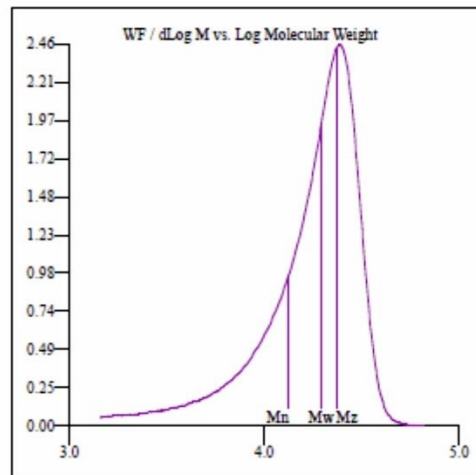

Figure S79. GPC eluogram of PLA obtained with **2** in  $\text{CH}_2\text{Cl}_2$  at  $-20^\circ\text{C}$ , Table 1, entry 24.

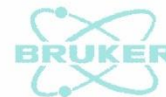

FileName: ...DCTB\_K\_RP05-20k\_P43\_c25\_defl600\0\_E20\1\1SRef\data\1\peaklist.xml  
 peak integrals - PG-013 [PLA] [CHCl<sub>3</sub>]  
 DCTB+K RP 05-20 kDa P=43% c=25 defl=600 Da

\* 1000

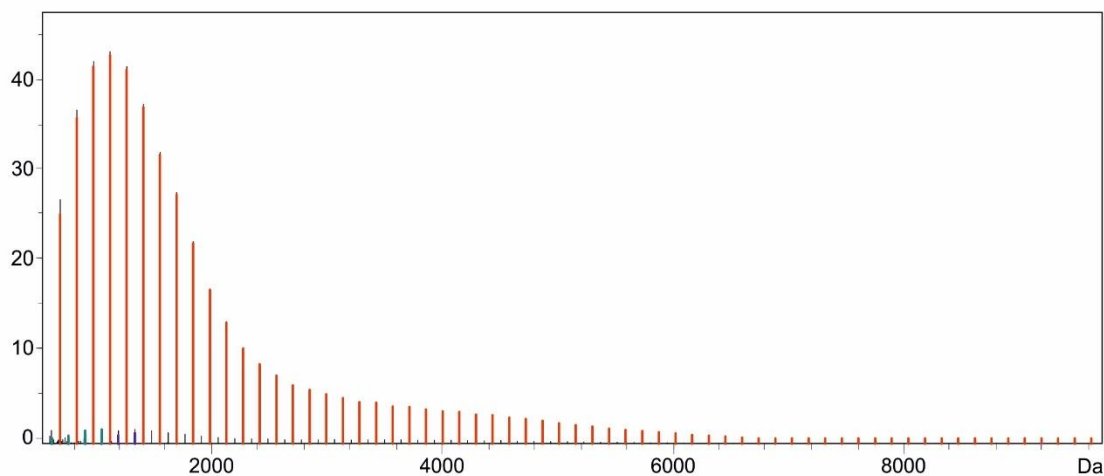

| n | ser. | rep.unit | resid.  | end1 | end2 | cation  | Mn      | Mw      | pd      | DP      | % I. | cnt |
|---|------|----------|---------|------|------|---------|---------|---------|---------|---------|------|-----|
| 1 | 1    | 144.042  | 75.5111 |      |      | 38.9637 | 1880.46 | 2770.85 | 1.47349 | 13.0549 | 92.8 | 63  |
| 2 | 2    | 144.042  | 3.29811 |      |      | 38.9637 | 1146.90 | 1172.95 | 1.02272 | 7.96226 | 0.8  | 6   |
| 3 | 2    | 144.042  | 2.75935 |      |      | 38.9637 | 712.087 | 723.536 | 1.01608 | 4.94360 | 0    | 3   |
| 4 | 2    | 144.042  | 3.97660 |      |      | 38.9637 | 865.401 | 887.775 | 1.02585 | 6.00796 | 0.9  | 4   |

Traces

D:\Dane\Mass\_Spectra\Rok\_2022\Work\PG-013\_PLA\_DCTB\_K\_RP05-20k\_P43\_c25\_defl600\0\_E20\1\1SRef

Comment 1 PG-013 [PLA] [CHCl<sub>3</sub>]  
 Comment 2 DCTB+K RP 05-20 kDa P=43% c=25 defl=600 Da

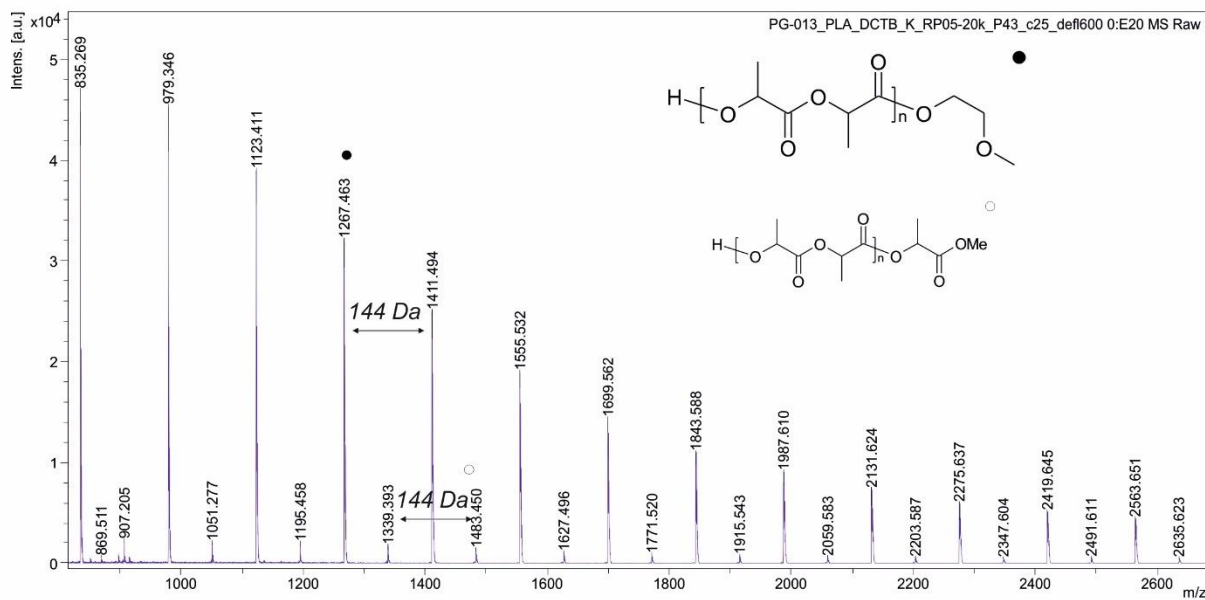

Bruker Daltonics flexAnalysis

page 1 of 4 12/6/2022 19:37:56

**Figure S80.** MALDI-TOF spectrum of PLA obtained with **2** in CH<sub>2</sub>Cl<sub>2</sub> at -40°C, Table 1, entry 27. Figure 2 (→)



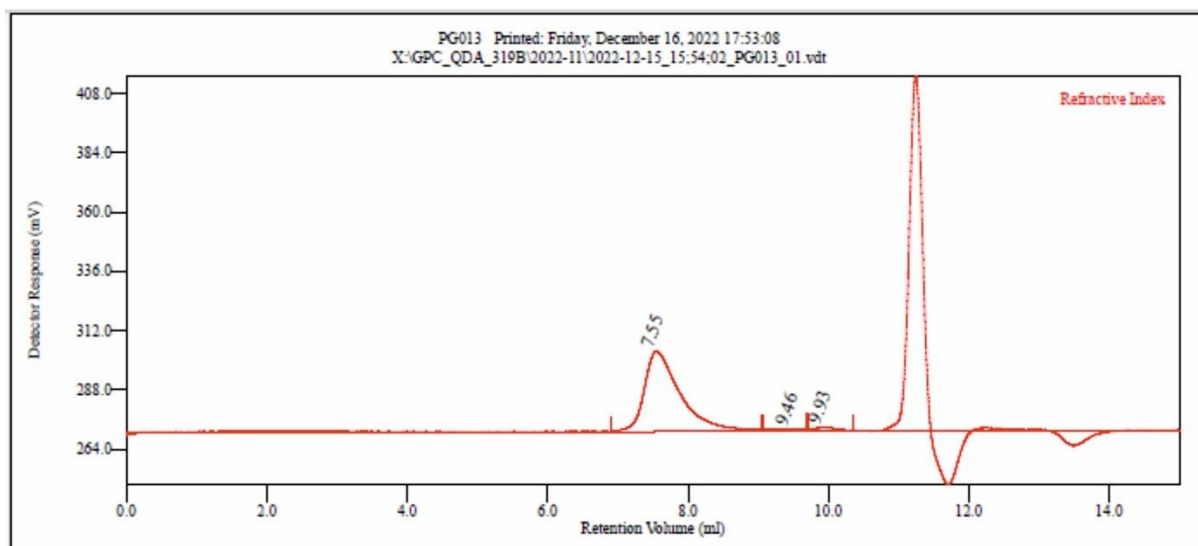

Warning: No flow rate marker was found.

Conventional Calibration - Homopolymers : Results

|                          |        |         |         |
|--------------------------|--------|---------|---------|
| Peak RV - (ml)           | 7.547  | 9.463   | 9.933   |
| Mn - (Daltons)           | 30,950 | 1,799   | 495     |
| Mw - (Daltons)           | 42,083 | 2,033   | 572     |
| Mz - (Daltons)           | 50,347 | 2,286   | 643     |
| Mp - (Daltons)           | 49,321 | 1,677   | 600     |
| Mw / Mn                  | 1.360  | 1.130   | 1.157   |
| Percent Above Mw:        | 0      | 100.000 | 100.000 |
| Percent Below Mw:        | 0      | 0.000   | 0.000   |
| Mw 10.0% Low             | 12,052 | 1,111   | 255     |
| Mw 10.0% High            | 76,619 | 3,372   | 929     |
| Wt Fr (Peak)             | 0.939  | 0.028   | 0.034   |
| RI Area - (mVml)         | 19.36  | 0.57    | 0.70    |
| UV @ 240nm Area - (mVml) | 0.00   | 0.00    | 0.00    |

| Annotation               |                                      |
|--------------------------|--------------------------------------|
| Method File              | CC_RI_PS_11-2022-0003-MLtry-0001.vcm |
| Limits File              |                                      |
| Date Acquired            | Dec 15, 2022 - 15:54:02              |
| Solvent                  | Chlorek meryleuu                     |
| Acquisition Operator     | admin : Administrator                |
| Calculation Operator     | admin : Administrator                |
| Column Set               | Jordi DVB Mixed Bed                  |
| System                   | QDA MB                               |
| Flow Rate - (ml/min)     | 1.000                                |
| Inj Volume - (ul)        | 50.0                                 |
| Volume Increment - (ml)  | 0.00333                              |
| Detector Temp. - (deg C) | 30.0                                 |
| Column Temp. - (deg C)   | 30.0                                 |
| OmniSEC Build Number     | 467                                  |

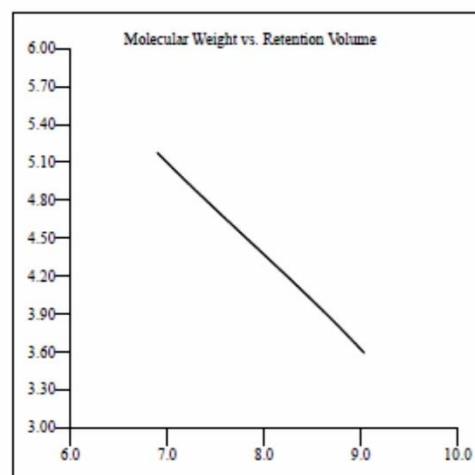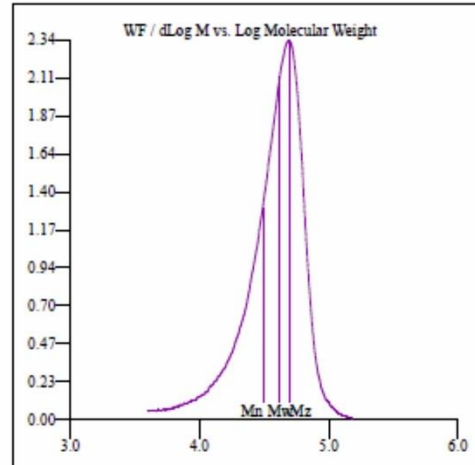

Figure S81. GPC eluogram of PLA obtained with **2** in  $\text{CH}_2\text{Cl}_2$  at  $-40^\circ\text{C}$ , Table 1, entry 27.

FileName: ...TB\_K\_RP700-3500\_P28\_c25\_defl0640\0\_A24\1\1SRef\pdata1\peaklist.xml  
 peak integrals - DT-12,1 [CHCl3]  
 DCTB+K RP 700-3500 Da P=28% c=25 defl=640 Da

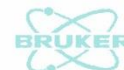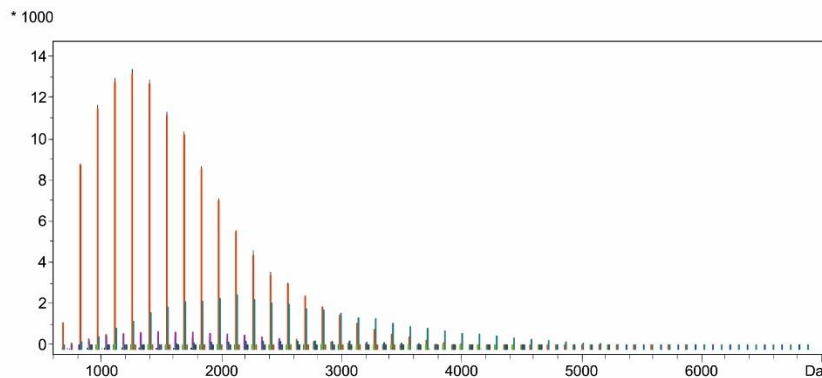

| n  | ser. | rep.unit | resid.   | end1 | end2 | cation  | Mn      | Mw      | pd      | DP      | % I. | cnt |
|----|------|----------|----------|------|------|---------|---------|---------|---------|---------|------|-----|
| 1  | 1    | 144.040  | 66.1240  |      |      | 38.9637 | 1613.83 | 1900.26 | 1.17748 | 11.2041 | 63.5 | 37  |
| 2  | 2    | 144.040  | 55.9850  |      |      | 38.9637 | 1792.59 | 1971.94 | 1.10005 | 12.4451 | 0.5  | 16  |
| 3  | 3    | 144.040  | 59.8062  |      |      | 38.9637 | 2443.11 | 2772.69 | 1.13490 | 16.9614 | 0.7  | 25  |
| 4  | 4    | 144.040  | 76.0859  |      |      | 38.9637 | 2605.89 | 3064.70 | 1.17607 | 18.0914 | 20.6 | 47  |
| 5  | 5    | 144.040  | 136.846  |      |      | 38.9637 | 1973.39 | 2469.53 | 1.25141 | 13.7003 | 3.9  | 13  |
| 6  | 5    | 144.040  | 138.242  |      |      | 38.9637 | 1625.56 | 1761.85 | 1.08384 | 11.2855 | 4.1  | 13  |
| 7  | 6    | 144.040  | -0.05486 |      |      | 38.9637 | 1950.22 | 2106.92 | 1.08035 | 13.5395 | 0.5  | 15  |
| 8  | 7    | 144.040  | 3.79145  |      |      | 38.9637 | 3047.74 | 3504.34 | 1.14982 | 21.1590 | 3.8  | 42  |
| 9  | 8    | 144.040  | 17.8703  |      |      | 38.9637 | 2417.31 | 2763.52 | 1.14322 | 16.7823 | 0.8  | 27  |
| 10 | 9    | 144.040  | 89.8719  |      |      | 38.9637 | 2225.74 | 2397.51 | 1.07717 | 15.4523 | 0.3  | 16  |

Traces may originate from hydrolysis of PLA during quenching with H<sub>2</sub>O/H<sup>+</sup>

D:\Dane\Mass\_Spectra\Rok\_2023\Work\DT-12-1\_DCTB\_K\_RP700-3500\_P28\_c25\_defl0640\0\_A24\1\1SRef

Comment 1 DT-12,1 [CHCl<sub>3</sub>]  
 Comment 2 DCTB+K RP 700-3500 Da P=28% c=25 defl=640 Da

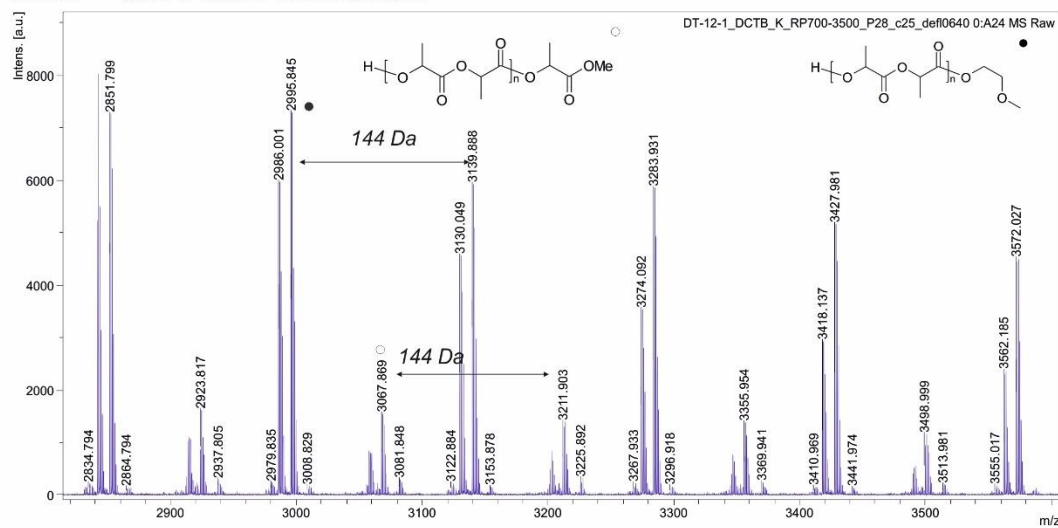

Bruker Daltonics flexAnalysis

printed: 8/1/2023 14:23:28

Figure S82. MALDI-TOF spectrum of PLA obtained with **2** in THF at r.t., Table 1, entry 19.

Figure 2 (—)

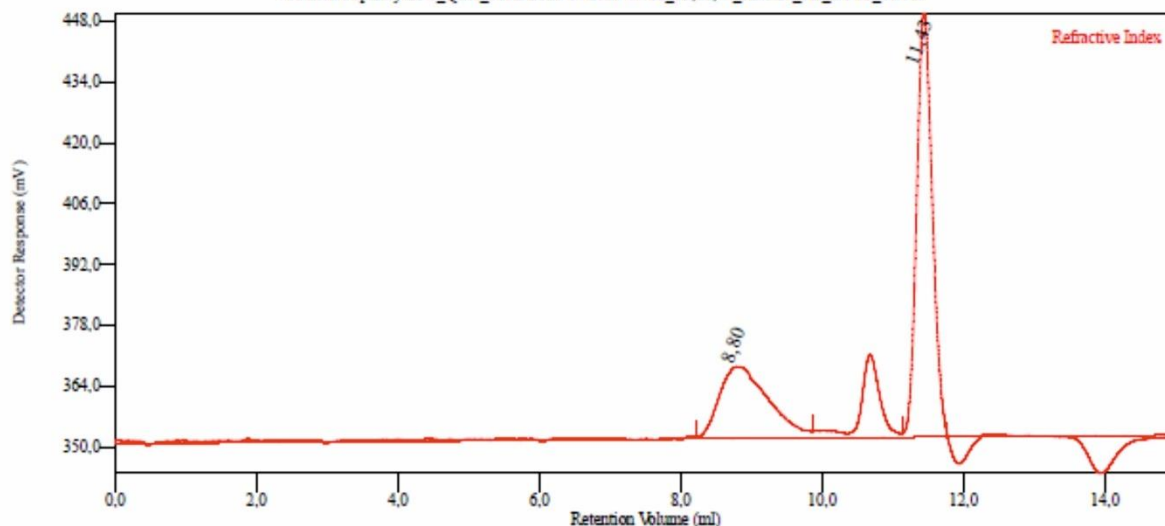

Conventional Calibration - Homopolymers : Results

|                        |        |         |
|------------------------|--------|---------|
| Peak RV - (ml)         | 8.803  | 11.433  |
| Mn - (Daltons)         | 5 089  | 0       |
| Mw - (Daltons)         | 7 503  | 0       |
| Mz - (Daltons)         | 9 628  | 0       |
| Mn - (Daltons)         | 8 478  | 0       |
| Mw / Mn                | 1.473  | 0.000   |
| Percent Above Mw:      | 0      | 100.000 |
| Percent Below Mw:      | 0      | 0.000   |
| Mw 10.0% Low           | 1 840  | 0       |
| Mw 10.0% High          | 15 309 | 0       |
| Wt Fr (Peak)           | 1.000  | 0.000   |
| RI Area - (mVml)       | 13.32  | 25.04   |
| UV@240nm Area - (mVml) | 0.00   | 0.00    |

| Annotation               |                           |
|--------------------------|---------------------------|
| Method File              | CC PS RI 2023-07-0012.vcm |
| Limits File              |                           |
| Date Acquired            | Jul 12, 2023 - 13:18:44   |
| Solvent                  | Chlorek metylem           |
| Acquisition Operator     | admin : Administrator     |
| Calculation Operator     | admin : Administrator     |
| Column Set               | Jordi DVB Mixed Bed       |
| System                   | QDA                       |
| Flow Rate - (ml/min)     | 1.000                     |
| inj Volume - (ul)        | 30.0                      |
| Volume Increment - (ml)  | 0.00333                   |
| Detector Temp. - (deg C) | 30.0                      |
| Column Temp. - (deg C)   | 30.0                      |
| OmniSEC Build Number     | 467                       |

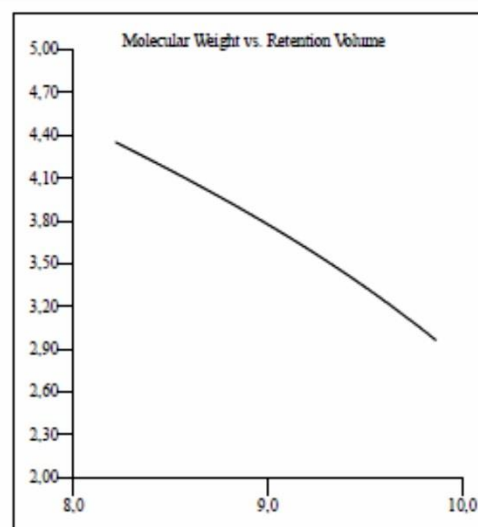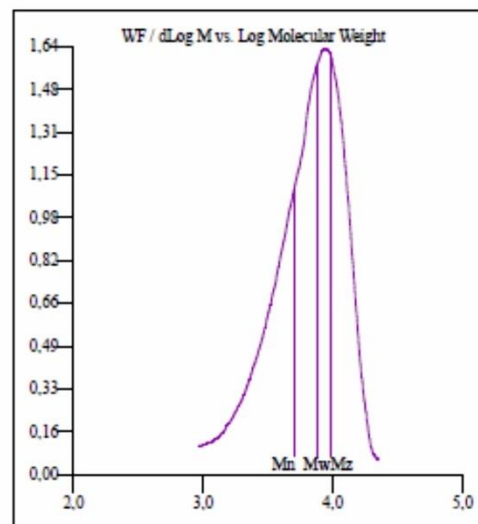

Figure S83. GPC eluogram of PLA obtained with **2** in THF at r.t., Table 1, entry 19.

FileName: ..B\_K\_RP700-3500\_P34\_c25\_defl0400\0\_C20\1\1SRef\data\1\peaklist.xml  
 peak integrals - IG-2,1 [CHCl3]  
 DCTB+K RP 700-3500 Da P=34% c=25 defl=400 Da

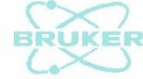

\* 1000

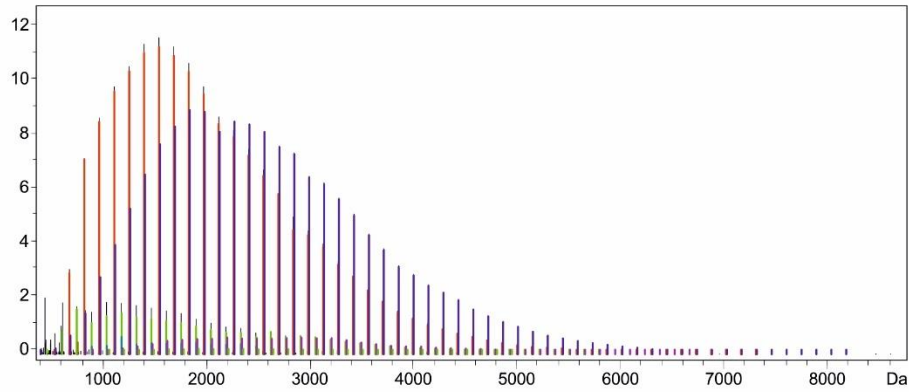

| n | ser. | rep.unit | resid.  | end1 | end2 | cation  | Mn      | Mw      | pd      | DP      | % I. | cnt |
|---|------|----------|---------|------|------|---------|---------|---------|---------|---------|------|-----|
| 1 | 1    | 144.038  | 66.0510 |      |      | 38.9637 | 2022.63 | 2473.14 | 1.22273 | 14.0423 | 42.4 | 48  |
| 2 | 2    | 144.038  | 75.8817 |      |      | 38.9637 | 2606.34 | 3085.06 | 1.18368 | 18.0948 | 40.8 | 55  |
| 3 | 3    | 144.038  | 136.880 |      |      | 38.9637 | 1882.72 | 2440.74 | 1.29639 | 13.0710 | 6.6  | 38  |
| 4 | 4    | 144.038  | 138.406 |      |      | 38.9637 | 1647.44 | 1774.12 | 1.07689 | 11.4375 | 0.9  | 12  |
| 5 | 5    | 144.038  | 0.18417 |      |      | 38.9637 | 1872.34 | 2036.65 | 1.08776 | 12.9989 | 0.5  | 15  |
| 6 | 6    | 144.038  | 3.68597 |      |      | 38.9637 | 2926.99 | 3394.22 | 1.15963 | 20.3209 | 3.2  | 41  |
| 7 | 7    | 144.038  | 17.8345 |      |      | 38.9637 | 2642.80 | 3003.72 | 1.13657 | 18.3479 | 0.8  | 28  |

Traces

Traces may originate from hydrolysis of PLA during quenching with H<sub>2</sub>O/H<sup>+</sup>

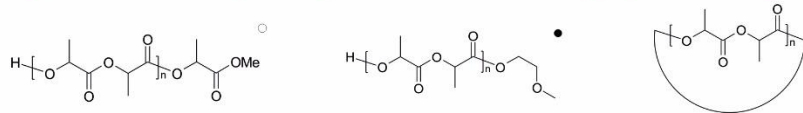

D:\Dane\Mass\_Spectra\Rok\_2023\Work\IG-2-1\_DCTB\_K\_RP700-3500\_P34\_c25\_defl0400\0\_C20\1\1SRef

Comment 1 IG-2,1 [CHCl3]  
 Comment 2 DCTB+K RP 700-3500 Da P=34% c=25 defl=400 Da

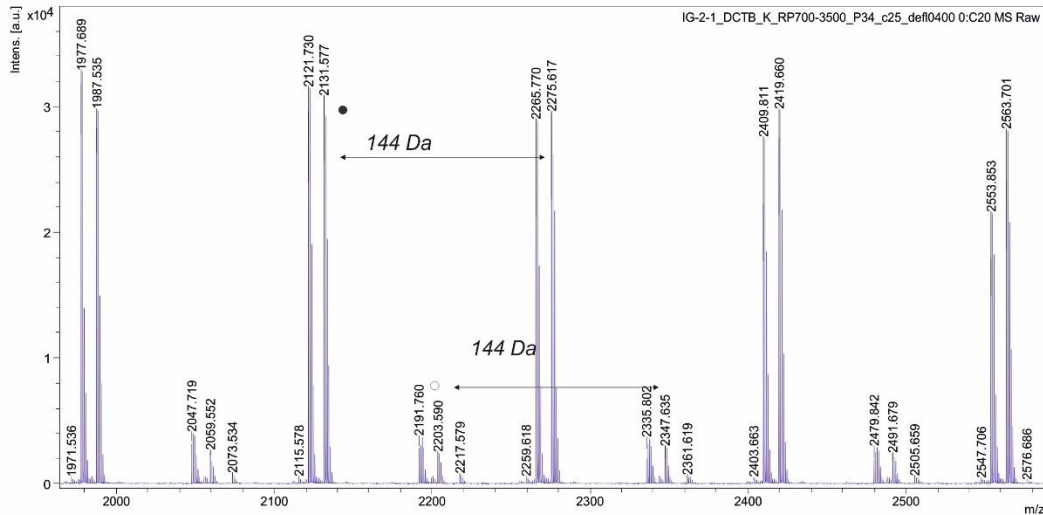

Bruker Daltonics flexAnalysis

printed: 8/1/2023 14:33:44

Figure S84. MALDI-TOF spectrum of PLA obtained with **2** in THF at 0°C, Table 1, entry 22.

Figure 2 (—)

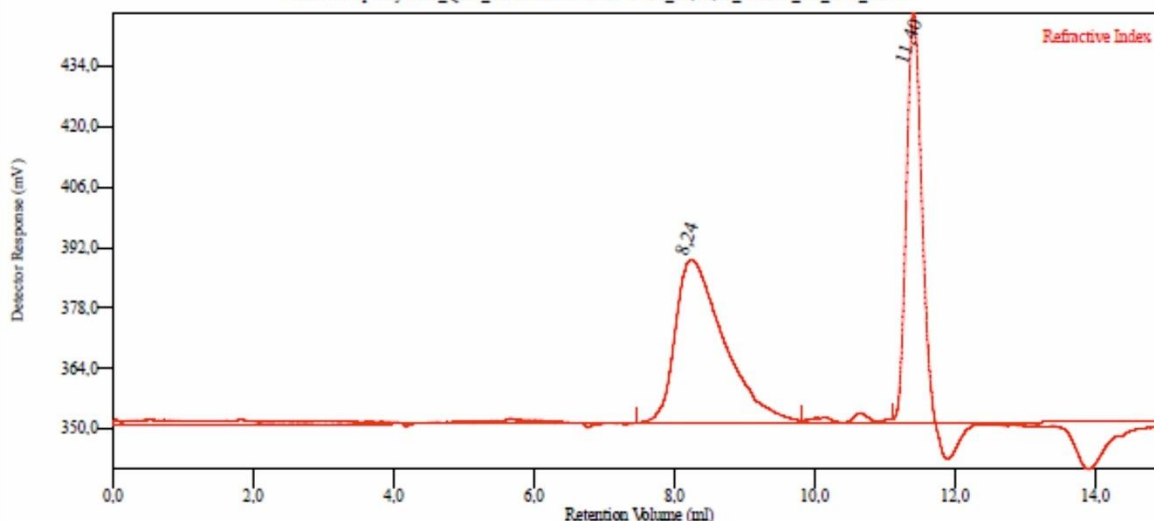

Conventional Calibration - Homopolymers : Results

|                         |        |         |
|-------------------------|--------|---------|
| Peak RV - (ml)          | 8.243  | 11.400  |
| Mn - (Daltons)          | 11 314 | 0       |
| Mw - (Daltons)          | 17 348 | 0       |
| Mz - (Daltons)          | 22 099 | 0       |
| Mp - (Daltons)          | 20 807 | 0       |
| Mw / Mn                 | 1.533  | 0.000   |
| Percent Above Mw:       | 0      | 100.000 |
| Percent Below Mw:       | 0      | 0.000   |
| Mw 10.0% Low            | 4 003  | 0       |
| Mw 10.0% High           | 34 700 | 0       |
| WT Fr (Peak)            | 1.000  | 0.000   |
| RT Area - (uv*ml)       | 30.32  | 23.22   |
| UV@240nm Area - (uv*ml) | 0.00   | 0.00    |

| Annotation               |                           |
|--------------------------|---------------------------|
| Method File              | CC PS RI 2023-07-0012.vcm |
| Limits File              |                           |
| Date Acquired            | Jul 12, 2023 - 12:31:10   |
| Solvent                  | Chlorek merylemi          |
| Acquisition Operator     | admin : Administrator     |
| Calculation Operator     | admin : Administrator     |
| Column Set               | Jordi DVB Mixed Bed       |
| System                   | QDA                       |
| Flow Rate - (ml/min)     | 1.000                     |
| Ini Volume - (ul)        | 30.0                      |
| Volume Increment - (ml)  | 0.00333                   |
| Detector Temp. - (deg C) | 30.0                      |
| Column Temp. - (deg C)   | 30.0                      |
| OmniSEC Build Number     | 467                       |

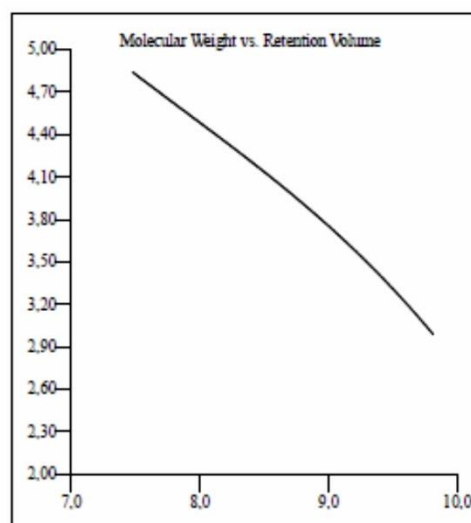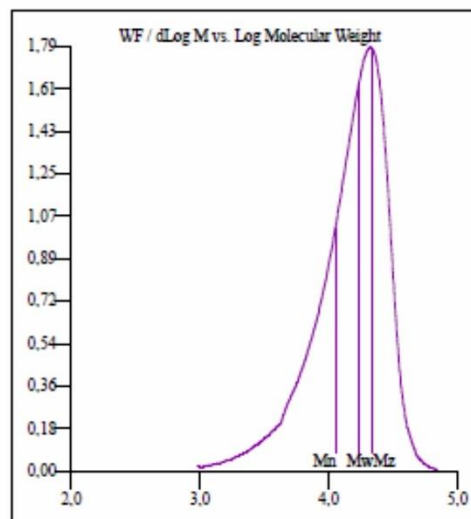

Figure S85. GPC eluogram of PLA obtained with **2** in THF at 0°C, Table 1, entry 22.



FileName: ...DCTB\_K\_RP05-20k\_P43\_c25\_defl600\0\_D17\1\1SRef\data\1\peaklist.xml  
 peak integrals - PG-010 [PLA] [CHCl3]  
 DCTB+K RP 05-20 kDa P=43% c=25 defl=600 Da

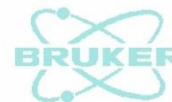

\* 1000

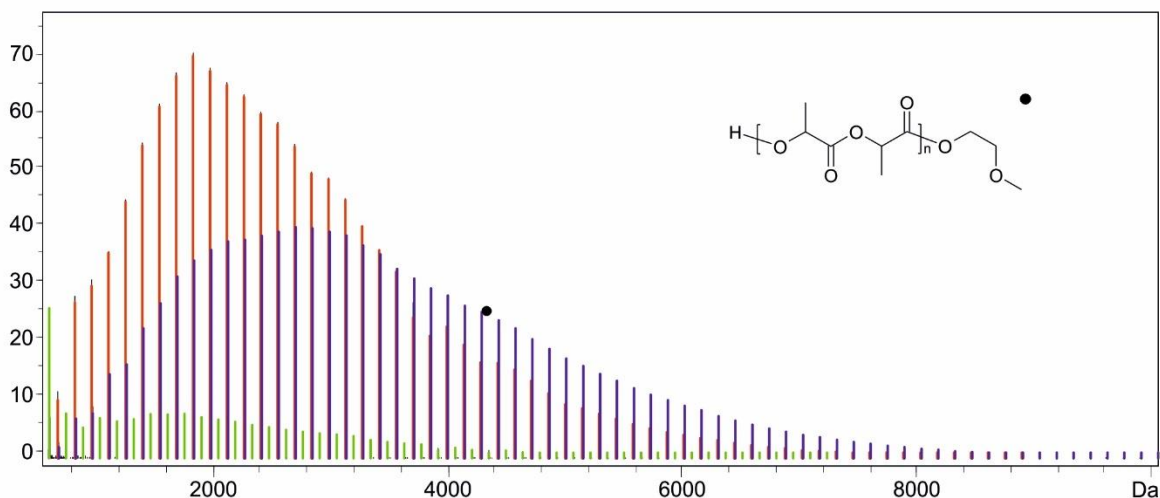

| n | ser. | rep.unit | resid.  | end1 | end2 | cation  | Mn      | Mw      | pd      | DP      | % I. | cnt |
|---|------|----------|---------|------|------|---------|---------|---------|---------|---------|------|-----|
| 1 | 1    | 144.042  | 65.6140 |      |      | 38.9637 | 2610.62 | 3229.86 | 1.23720 | 18.1240 | 51.6 | 58  |
| 2 | 2    | 144.042  | 75.3782 |      |      | 38.9637 | 3495.85 | 4273.79 | 1.22253 | 24.2696 | 40.7 | 80  |
| 3 | 3    | 144.042  | 136.174 |      |      | 38.9637 | 1973.39 | 2739.37 | 1.38815 | 13.7001 | 6.5  | 47  |

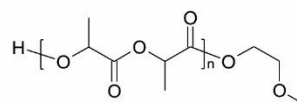

D:\Dane\Mass\_Spectra\Rok\_2022\Work\PG-010\_PLA\_DCTB\_K\_RP05-20k\_P43\_c25\_defl600\0\_D17\1\1SRef

Comment 1 PG-010 [PLA] [CHCl3]  
 Comment 2 DCTB+K RP 05-20 kDa P=43% c=25 defl=600 Da

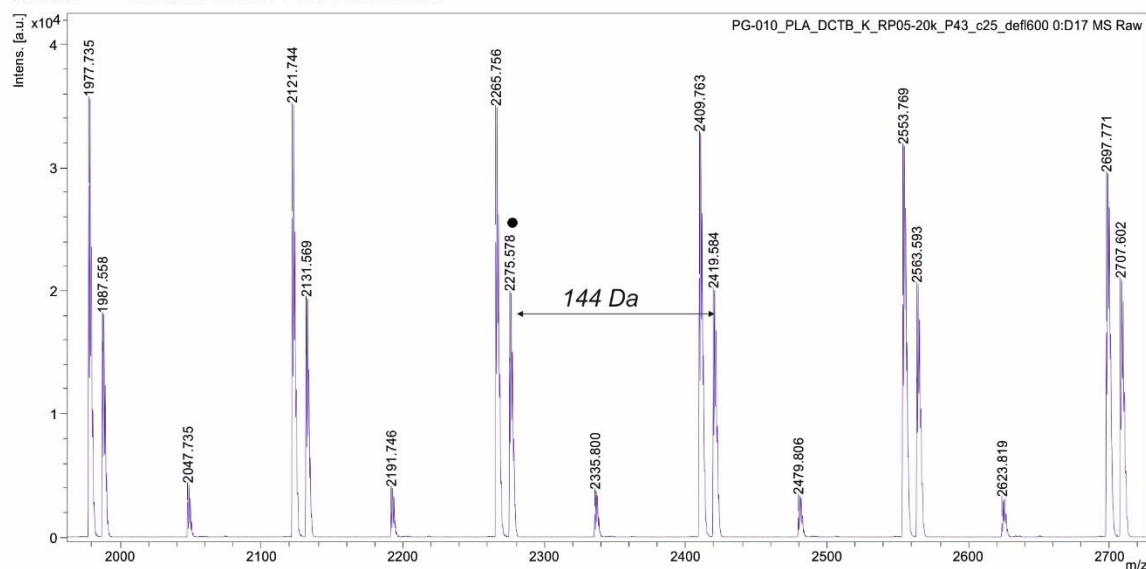

Bruker Daltonics flexAnalysis

printed: 12/6/2022 19:20:27

page 1 of 1

**Figure S86.** MALDI-TOF spectrum of PLA obtained with **2** in THF at  $-20^{\circ}\text{C}$ , Table 1, entry 25. Figure 2 (—)

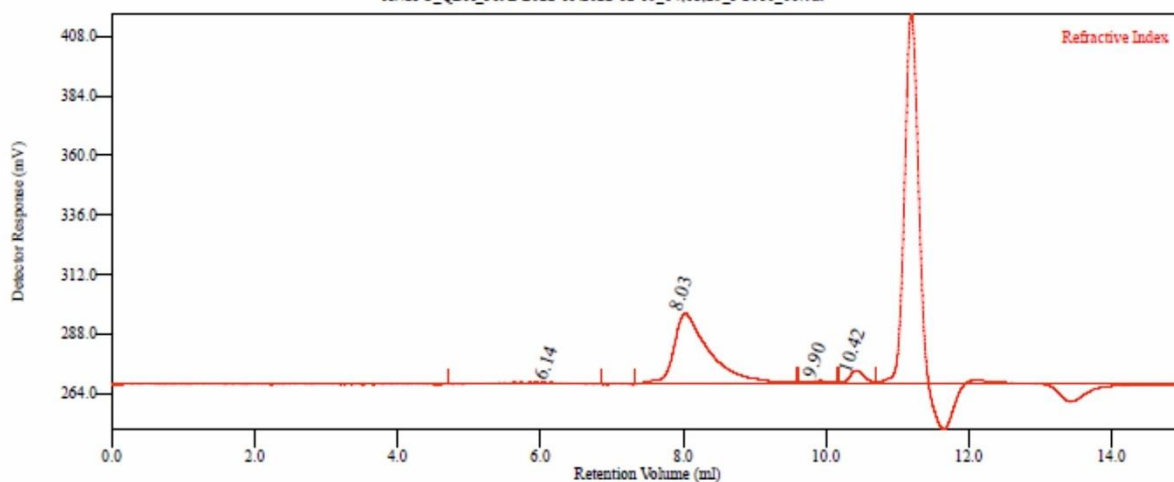

Warning: No flow rate marker was found.

Conventional Calibration - Homopolymers : Results

| Peak RV - (ml)         | 6.137     | 8.027   | 9.897   | 10.420  |
|------------------------|-----------|---------|---------|---------|
| Mn - (Daltons)         | 1.094 e 6 | 12.745  | 643     | 162     |
| Mw - (Daltons)         | 5.452 e 6 | 18.620  | 707     | 176     |
| Mz - (Daltons)         | 1.386 e 7 | 22.875  | 776     | 190     |
| Mp - (Daltons)         | 648.422   | 22.420  | 654     | 177     |
| Mw / Mn                | 4.985     | 1.461   | 1.100   | 1.083   |
| Percent Above Mw:      | 100.000   | 100.000 | 100.000 | 100.000 |
| Percent Below Mw:      | 0         | 0.000   | 0.000   | 0.000   |
| Mw 10.0% Low           | 276,962   | 4,572   | 400     | 100     |
| Mw 10.0% High          | 1.042 e 7 | 35,083  | 1,134   | 273     |
| Wt Fr (Peak)           | 0.037     | 0.867   | 0.025   | 0.071   |
| RI Area - (mVml)       | 0.71      | 16.76   | 0.49    | 1.38    |
| UV@240nm Area - (mVml) | 0.00      | 0.00    | 0.00    | 0.00    |

| Annotation               |                                      |
|--------------------------|--------------------------------------|
| Method File              | CC_RI_PS_11-2022-0003-MLtry-0001.vcm |
| Limits File              |                                      |
| Date Acquired            | Dec 15, 2022 - 14:18:25              |
| Solvent                  | Chloroacetylene                      |
| Acquisition Operator     | admin : Administrator                |
| Calculation Operator     | admin : Administrator                |
| Column Set               | Jordi DVB Mixed Bed                  |
| System                   | QDA MB                               |
| Flow Rate - (ml/min)     | 1.000                                |
| Inj Volume - (ul)        | 50.0                                 |
| Volume Increment - (ml)  | 0.003333                             |
| Detector Temp. - (deg C) | 30.0                                 |
| Column Temp. - (deg C)   | 30.0                                 |
| OmniSEC Build Number     | 467                                  |

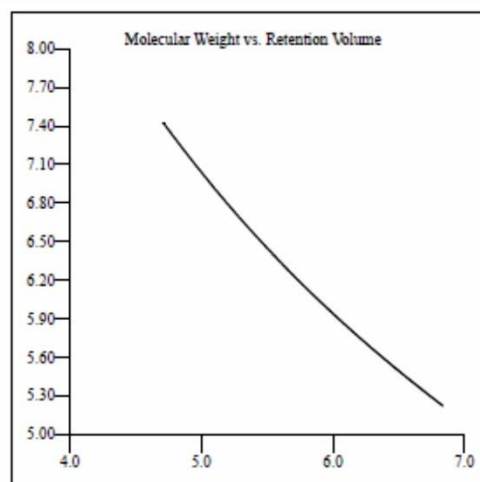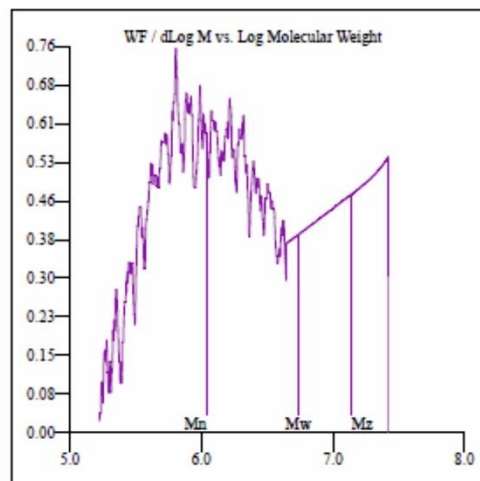

Figure S87. GPC eluogram of PLA obtained with 2 in THF at -20°C, Table 1, entry 25.

FileName: ...DCTB\_K\_RP05-20k\_P40\_c25\_defl600\0\_E24\1\1SRef\data\1\peaklist.xml  
 peak integrals - PG-014 [PLA] [CHCl3]  
 DCTB+K RP 05-20 kDa P=40% c=25 defl=600 Da

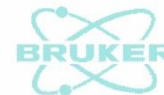

\* 1000

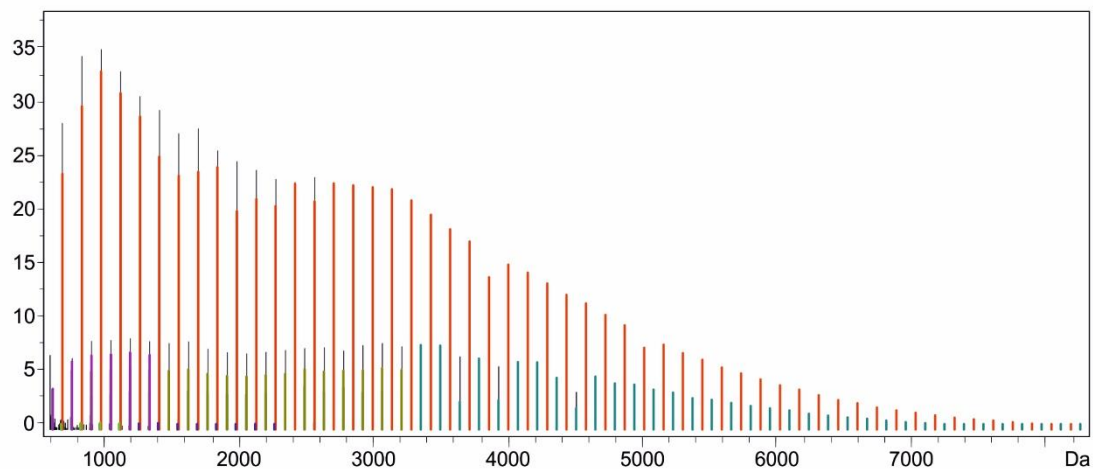

| n | ser. | rep.unit | resid.  | end1    | end2 | cation  | Mn      | Mw      | pd      | DP      | % I. | cnt |
|---|------|----------|---------|---------|------|---------|---------|---------|---------|---------|------|-----|
| 1 | 1    | 144.042  | 75.5478 |         |      | 38.9637 | 2713.01 | 3622.50 | 1.33523 | 18.8348 | 71.1 | 66  |
| 2 | 2    | 144.042  | 65.5309 |         |      | 38.9637 | 1430.01 | 1540.63 | 1.07735 | 9.92774 | 0.2  | 12  |
| 3 | 2    | 144.042  | 66.2388 |         |      | 38.9637 | 899.477 | 922.065 | 1.02511 | 6.24454 | 0.1  | 4   |
| ? | 4    | 3        | 144.042 | 1.45041 |      | 38.9637 | 4198.30 | 4655.64 | 1.10893 | 29.1463 | 10.8 | 59  |
| ? | 5    | 3        | 144.042 | 2.62546 |      | 38.9637 | 2274.03 | 2420.19 | 1.06427 | 15.7873 | 9.7  | 17  |
| o | 6    | 3        | 144.042 | 3.38903 |      | 38.9637 | 1010.91 | 1069.56 | 1.05802 | 7.01818 | 3.4  | 6   |

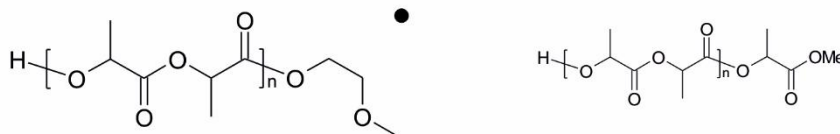

D:\Dane\Mass\_Spectra\Rok\_2022\Work\PG-014\_PLA\_DCTB\_K\_RP05-20k\_P40\_c25\_defl600\0\_E24\1\1SRef

Comment 1 PG-014 [PLA] [CHCl3]  
 Comment 2 DCTB+K RP 05-20 kDa P=40% c=25 defl=600 Da

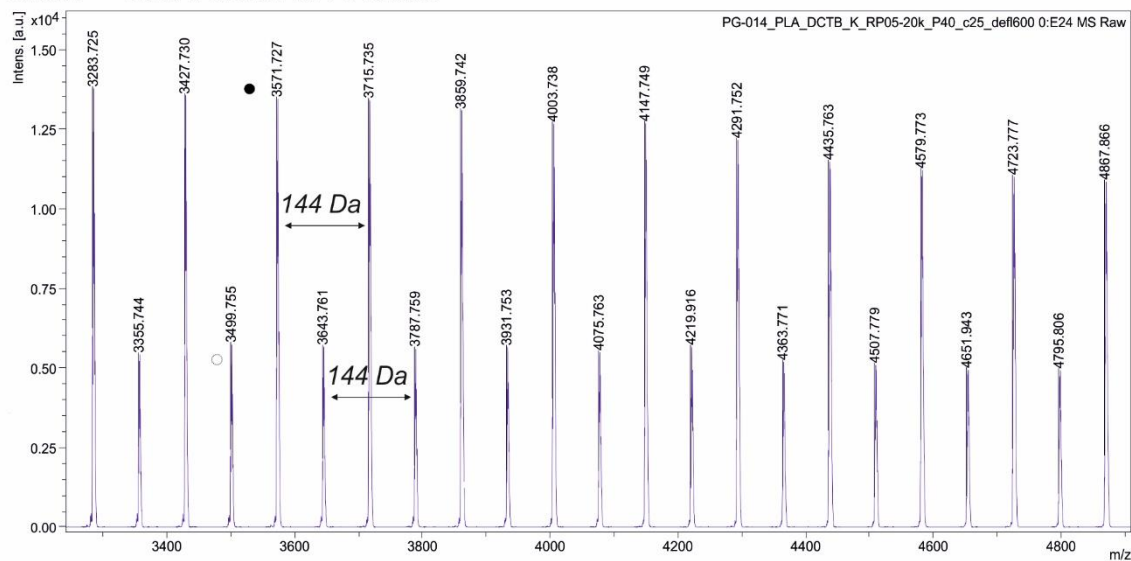

Bruker Daltonics flexAnalysis

printed: 12/6/2022 19:40:51

**Figure S88.** MALDI-TOF spectrum of PLA obtained with **2** in THF at  $-40^{\circ}\text{C}$ , Table 1, entry

28. Figure 2 (→)



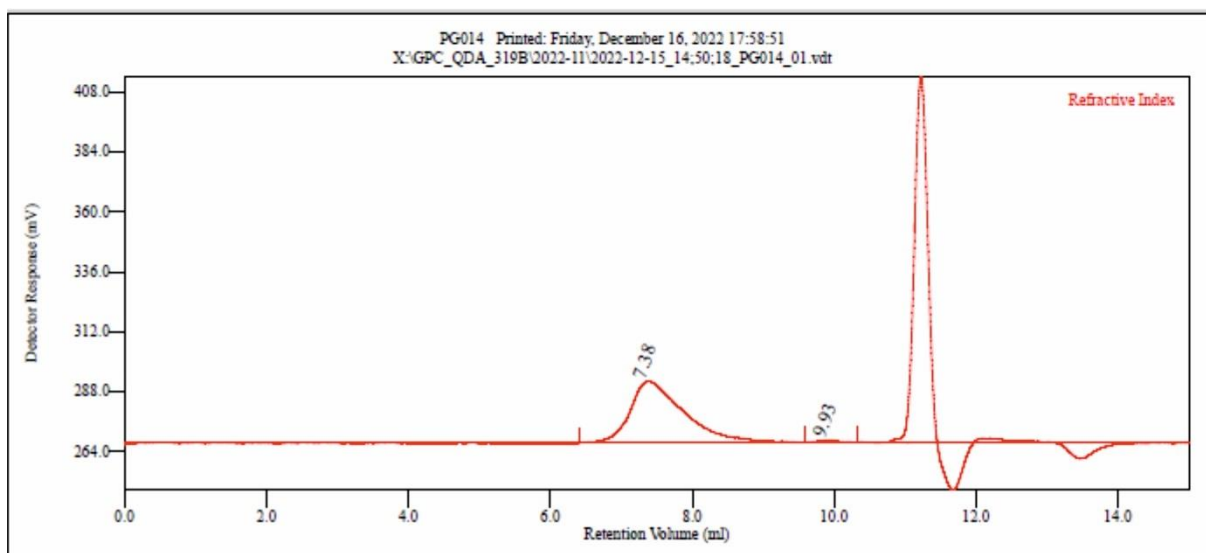

Warning: No flow rate marker was found.

Conventional Calibration - Homopolymers : Results

|                        |         |         |
|------------------------|---------|---------|
| Peak RV - (ml)         | 7.383   | 9.927   |
| Mn - (Daltons)         | 30,060  | 557     |
| Mw - (Daltons)         | 56,283  | 648     |
| Mz - (Daltons)         | 79,831  | 740     |
| Mp - (Daltons)         | 64,750  | 613     |
| Mw / Mn                | 1.872   | 1.163   |
| Percent Above Mw:      | 0       | 100.000 |
| Percent Below Mw:      | 0       | 0.000   |
| Mw 10.0% Low           | 10,045  | 288     |
| Mw 10.0% High          | 133,794 | 1,163   |
| Wt Fr (Peak)           | 0.980   | 0.020   |
| RI Area - (mVml)       | 21.85   | 0.44    |
| UV@240nm Area - (mVml) | 0.00    | 0.00    |

|                          |                                      |
|--------------------------|--------------------------------------|
| Annotation               |                                      |
| Method File              | CC_RI_PS_11-2022-0003-MLtry-0001.vcm |
| Limits File              |                                      |
| Date Acquired            | Dec 15, 2022 - 14:50:18              |
| Solvent                  | Chloroform                           |
| Acquisition Operator     | admin : Administrator                |
| Calculation Operator     | admin : Administrator                |
| Column Set               | Jordi DVB Mixed Bed                  |
| System                   | QDA MB                               |
| Flow Rate - (ml/min)     | 1.000                                |
| Inj Volume - (ul)        | 50.0                                 |
| Volume Increment - (ml)  | 0.00333                              |
| Detector Temp. - (deg C) | 30.0                                 |
| Column Temp. - (deg C)   | 30.0                                 |
| OmniSEC Build Number     | 467                                  |

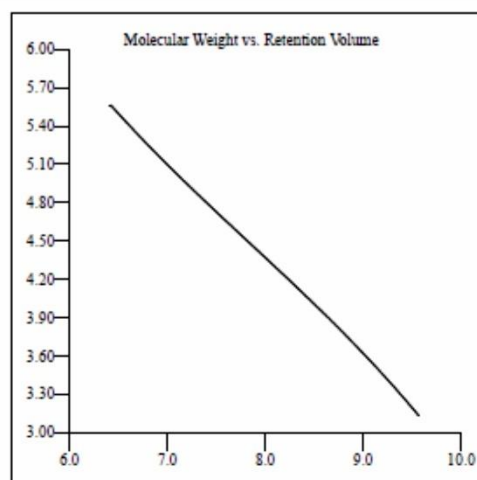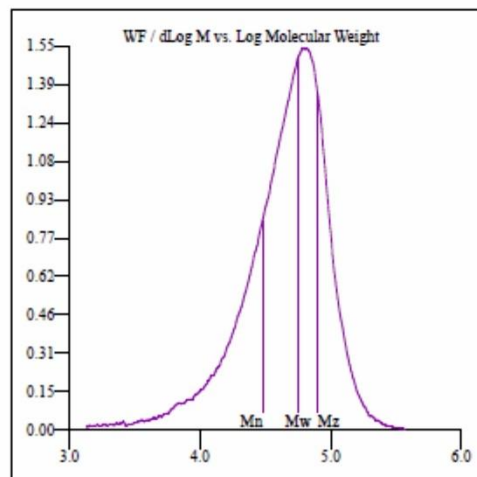

Figure S89. GPC eluogram of PLA obtained with **2** in THF at  $-40^{\circ}\text{C}$ , Table 1, entry 28.
